# Supplementary material for: Cost–benefit analysis of surveillance for surgical site infection following caesarean section
Source: PubMed Central journal article supplement — BMJ Open. 2020 Jul 20;10(7):e036919. doi: 10.1136/bmjopen-2020-036919 (PMC7375637; doi:10.1136/bmjopen-2020-036919), 2020-07-20
Supplement: bmjopen-2020-036919.draft_revisions.pdf [file bmjopen-2020-036919.draft_revisions.pdf]

# BMJ Open

BMJ Open is committed to open peer review. As part of this commitment we make the peer review history of every article we publish publicly available.

When an article is published we post the peer reviewers' comments and the authors' responses online. We also post the versions of the paper that were used during peer review. These are the versions that the peer review comments apply to.

The versions of the paper that follow are the versions that were submitted during the peer review process. They are not the versions of record or the final published versions. They should not be cited or distributed as the published version of this manuscript.

BMJ Open is an open access journal and the full, final, typeset and author-corrected version of record of the manuscript is available on our site with no access controls, subscription charges or pay-per-view fees (<http://bmjopen.bmj.com>).

If you have any questions on BMJ Open's open peer review process please email [info.bmjopen@bmj.com](mailto:info.bmjopen@bmj.com)

# BMJ Open

## Cost-benefit analysis of surveillance for surgical site infection following caesarean section

|                               |                                                                                                                                                                                                                                                                                                                                                                                                                                                                                                                                                                                                                                                                                             |
|-------------------------------|---------------------------------------------------------------------------------------------------------------------------------------------------------------------------------------------------------------------------------------------------------------------------------------------------------------------------------------------------------------------------------------------------------------------------------------------------------------------------------------------------------------------------------------------------------------------------------------------------------------------------------------------------------------------------------------------|
| Journal:                      | <i>BMJ Open</i>                                                                                                                                                                                                                                                                                                                                                                                                                                                                                                                                                                                                                                                                             |
| Manuscript ID                 | bmjopen-2020-036919                                                                                                                                                                                                                                                                                                                                                                                                                                                                                                                                                                                                                                                                         |
| Article Type:                 | Original research                                                                                                                                                                                                                                                                                                                                                                                                                                                                                                                                                                                                                                                                           |
| Date Submitted by the Author: | 10-Jan-2020                                                                                                                                                                                                                                                                                                                                                                                                                                                                                                                                                                                                                                                                                 |
| Complete List of Authors:     | Wloch, Catherine; Public Health England, Healthcare Associated Infection and Antimicrobial Resistance Division<br>Van Hoek, Albert Jan; London School of Hygiene and Tropical Medicine, Infectious Disease Epidemiology<br>Green, Nathan; Imperial College London, Department of Infectious Disease Epidemiology<br>Conneely, Joanna; Public Health England, Healthcare Associated Infections and Antimicrobial Resistance<br>Harrington, Pauline; Public Health England, HCAI & AMR<br>Sheridan, Elizabeth; Public Health England,<br>Wilson, Jennie; University of West London,<br>Lamagni, Theresa; Public Health England, Healthcare Associated Infections and Antimicrobial Resistance |
| Keywords:                     | HEALTH ECONOMICS, Maternal medicine < OBSTETRICS, Epidemiology < INFECTIOUS DISEASES                                                                                                                                                                                                                                                                                                                                                                                                                                                                                                                                                                                                        |
|                               |                                                                                                                                                                                                                                                                                                                                                                                                                                                                                                                                                                                                                                                                                             |

SCHOLARONE™  
Manuscripts

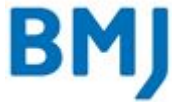

I, the Submitting Author has the right to grant and does grant on behalf of all authors of the Work (as defined in the below author licence), an exclusive licence and/or a non-exclusive licence for contributions from authors who are: i) UK Crown employees; ii) where BMJ has agreed a CC-BY licence shall apply, and/or iii) in accordance with the terms applicable for US Federal Government officers or employees acting as part of their official duties; on a worldwide, perpetual, irrevocable, royalty-free basis to BMJ Publishing Group Ltd ("BMJ") its licensees and where the relevant Journal is co-owned by BMJ to the co-owners of the Journal, to publish the Work in this journal and any other BMJ products and to exploit all rights, as set out in our [licence](#).

The Submitting Author accepts and understands that any supply made under these terms is made by BMJ to the Submitting Author unless you are acting as an employee on behalf of your employer or a postgraduate student of an affiliated institution which is paying any applicable article publishing charge ("APC") for Open Access articles. Where the Submitting Author wishes to make the Work available on an Open Access basis (and intends to pay the relevant APC), the terms of reuse of such Open Access shall be governed by a Creative Commons licence – details of these licences and which [Creative Commons](#) licence will apply to this Work are set out in our licence referred to above.

Other than as permitted in any relevant BMJ Author's Self Archiving Policies, I confirm this Work has not been accepted for publication elsewhere, is not being considered for publication elsewhere and does not duplicate material already published. I confirm all authors consent to publication of this Work and authorise the granting of this licence.

1  
2  
3 **Cost-benefit analysis of surveillance for surgical site infection following**  
4 **caesarean section**  
5  
6

7  
8 Catherine Wloch, Albert Jan van Hoek, Nathan Green, Joanna Conneely, Pauline  
9 Harrington, Elizabeth Sheridan, Jennie Wilson, Theresa Lamagni  
10  
11  
12

13  
14  
15  
16 Healthcare-Associated Infection and Antimicrobial Resistance Division, National  
17 Infection Service, Public Health England, London NW9 5EQ, UK  
18  
19  
20

21 Catherine Wloch  
22

23 Senior Scientist,  
24

25 Joanna Conneely  
26

27 Operations Manager,  
28

29 Pauline Harrington  
30

31 Surveillance Manager,  
32

33 Elizabeth Sheridan  
34

35 Consultant Microbiologist,  
36

37 Theresa Lamagni  
38

39 Senior Epidemiologist  
40  
41  
42  
43  
44  
45  
46  
47  
48  
49  
50  
51

52 Immunisation, Hepatitis, and Blood Safety Department, National Infection Service,  
53 Public Health England, London NW9 5EQ, UK  
54  
55  
56

57 Albert Jan van Hoek  
58  
59  
60

1  
2  
3 Health Economist / Infectious disease modeller  
4  
5  
6  
7

8  
9 Department of Infectious Disease Epidemiology, School of Public Health, Faculty of  
10  
11 Medicine, Imperial College London, London W2 1PG, UK  
12

13  
14 Nathan Green

15  
16  
17 Research Fellow  
18  
19  
20  
21

22 University of West London, London W5 5RF, UK  
23  
24

25 Jennie Wilson,  
26  
27

28 Reader Healthcare Epidemiology  
29  
30  
31  
32

33 Correspondence to: [Catherine.wloch@phe.gov.uk](mailto:Catherine.wloch@phe.gov.uk)  
34  
35  
36  
37  
38  
39  
40  
41  
42  
43  
44  
45  
46  
47  
48  
49  
50  
51  
52  
53  
54  
55  
56  
57  
58  
59  
60

## ABSTRACT

**Objective** To estimate the economic burden to the health service of surgical site infection following caesarean section and to identify potential savings achievable through implementation of a surveillance programme.

**Design** Economic model to evaluate the costs and benefits of surveillance from community and hospital healthcare providers' perspective.

**Setting** England.

**Participants** Women undergoing caesarean section in National Health Service hospitals.

**Main outcome measure** Costs attributable to treatment and management of surgical site infection following caesarean section.

**Results** The costs (2010) for a hospital carrying out 800 caesarean sections a year based on infection risk of 9.6% were estimated at £18,914 (95% CI 11,521 to 29,499) with 28% accounted for by community care (£5,370). This equates to a cost of £4.8m (inflated to 2017 prices) for the equivalent infection risk for all caesarean sections performed annually in England 2017-18. The cost of surveillance for a hospital for one calendar quarter was estimated as £3,747.

Modelling a decrease in risk of infection of 30, 20 or 10% between successive surveillance periods indicated that a variable intermittent surveillance strategy achieved higher or similar net savings than continuous surveillance. Breakeven was reached sooner with the variable surveillance strategy than continuous surveillance

1  
2  
3 when the baseline risk of infection was 10 or 15% and smaller losses with a baseline  
4 risk of 5%.  
5  
6  
7

8  
9 **Conclusion** Surveillance of surgical site infections after caesarean section with  
10 feedback of data to surgical teams offers a potentially effective means to reduce  
11 infection risk, improve patient experience and save money for the health service.  
12  
13  
14

### 15 16 17 **Strengths and limitations** 18

- 19  
20 • The model estimated both community (28%) and hospital costs (72%),  
21 providing a more representative estimate of overall economic burden to the  
22 health service.  
23
- 24 • Time-matching of patients with and without infection according to length of  
25 post-operative stay provided a more accurate assessment of excess bed-days  
26 attributable to surgical site infection (2.6 days) than average excess length of  
27 stay (median 5 days) comparison by disentangling the impact of prolonged  
28 length of stay on increased chance of detecting an infection.  
29
- 30 • Through capture and assessment of the costs and impact of surveillance, our  
31 model demonstrated the potential for savings through reductions in incidence  
32 of surgical site infections.  
33
- 34 • Costs were obtained from NHS National Schedule Reference Costs and other  
35 sources rather than observed expenditure and assumptions made about the  
36 number of extra midwife and general practitioner appointments resulting from  
37 infection.  
38
- 39 • The study was based on healthcare utilisation and did not assess direct and  
40 indirect costs borne by the patients or their carers.  
41  
42  
43  
44  
45  
46  
47  
48  
49  
50  
51  
52  
53  
54  
55  
56  
57  
58  
59  
60

## INTRODUCTION

Caesarean section delivery rates have risen in recent years in many Organisation for Economic Co-operation and Development (OECD) countries and ranged from 15.5% of deliveries in Finland to 53.1% in Turkey in 2015.<sup>1</sup> In England caesarean section rates have risen from 9% of deliveries in 1980 to 28.4% in 2017-18.<sup>2</sup>

Surgical site infection is a common and potentially serious complication of caesarean section with risk of infection of 9-11% reported previously in the UK.<sup>3;4</sup> The majority of post-caesarean surgical site infections are superficial infections of the skin and subcutaneous tissue which can be managed by the community midwife and general practitioner. However, in the UK, 10-13% are more serious deep infections of the muscle and fascial layer or organ/space infections (endometritis and reproductive tract infections)<sup>4-6</sup> which may require readmission to hospital. As well as causing anxiety and pain for the patient, these infections result in costs to the health service both in terms of excess length of hospital stay and for treatment of the infections in the community. In very rare instances, a surgical site infection following caesarean section can have fatal consequences.<sup>7</sup>

The use of surveillance to measure the risk of surgical site infection and feedback of results to surgeons has been shown to be effective in reducing the risk of infection.<sup>8-10</sup> However, surveillance of surgical site infection is resource-intensive and studies to assess its cost-benefit have not been conducted. The Surgical Site Infection Surveillance Service at Public Health England provides national coordination for surgical site infection surveillance for hospitals in England. In 2009 Public Health England conducted a multi-centre study of surgical site infection following caesarean section to test the feasibility of post-discharge detection methods and establish a



1  
2  
3 national benchmark for infection risk.<sup>6</sup> Based on the findings from the study, we  
4  
5 undertook a further assessment of the economic burden of infection and the potential  
6  
7 savings achievable through establishing surveillance as a means to stimulate a  
8  
9 review of clinical practices and direct infection prevention measures.  
10  
11  
12  
13  
14  
15

## 16 **METHODS**

17  
18  
19  
20 A cost-benefit model was constructed to estimate the costs to the health service of  
21  
22 managing surgical site infection post-caesarean section both in hospital and in the  
23  
24 community.  
25  
26

### 27 **Cohort study**

28  
29  
30 The estimated risk of infection was based on data captured during a multi-centre  
31  
32 cohort study.<sup>6</sup> Of the 4107 women followed-up after caesarean section across the  
33  
34 14 National Health Service centres participating in the 2009 study, 9.6% (394)  
35  
36 developed a surgical site infection meeting the study case definitions. Overall 11.7%  
37  
38 (46) of infections were organ/space (endometritis and female genital tract infections)  
39  
40 or deep incisional infections and the remaining 88.3% were superficial incisional  
41  
42 infections. In the cohort study, surgical site infections were detected during the initial  
43  
44 inpatient hospital admission in which the caesarean section was performed, at  
45  
46 readmission to hospital, in the community by midwives visiting women in their own  
47  
48 home or via a patient questionnaire at 30 days after the operation. Standard case  
49  
50 definitions, based on clinical and laboratory findings, were used to identify surgical  
51  
52 site infection that occurred up to 30 days after the operation.<sup>6;11</sup> Table 1 shows the  
53  
54 parameters taken from the cohort study for use in the model.  
55  
56  
57  
58  
59  
60

1  
2  
3 Seven of the participating hospitals repeated the surveillance for a further three-  
4 month period and the risk of infection were compared between these two periods.  
5

6  
7 The seven hospitals who repeated the surveillance for a second period carried out a  
8 total of 1212 operations with 131 infections in the first period (10.8% risk) and 1235  
9 operations with 89 infections (7.2% risk) in the second period. A slight but non-  
10 significant increase in infection risk was observed for two of the seven hospitals,  
11 whereas five hospitals experienced a decrease in infection risk, three of which were  
12 significant (Figure 1). The mean reduction in infection risk between the 2 periods  
13 across all hospitals was -31.2% (range from -73.3 to 19.5%).  
14  
15  
16  
17  
18  
19  
20  
21  
22  
23  
24

### 25 **Hospital treatment costs**

26  
27 Costs were modelled on a hospital undertaking a three-month period of surveillance  
28 and conducting 800 caesarean sections per year (the approximate average number  
29 of operations for hospitals participating in the multi-centre study).  
30  
31  
32  
33  
34

35 The length of the initial hospital stay during which the caesarean section was  
36 performed was derived from data captured during the study. A case-control paired  
37 matching approach was used to estimate excess length of stay for patients with an  
38 infection diagnosed during the inpatient stay. A mean average of paired differences  
39 between total post-operative length of stay of a patient with surgical site infection  
40 (case) and total length of stay of matched patients without infection (controls) was  
41 calculated. Under the assumption that the exposure to infection is from the time of  
42 surgery onwards, then the time in hospital before caesarean section is assumed not  
43 to put the patients at additional risk of surgical site infection. We selected controls by  
44 identifying patients matched on confounders to account for varying length of stay  
45 (age, antimicrobial prophylaxis, American Society of Anesthesiologists physical  
46  
47  
48  
49  
50  
51  
52  
53  
54  
55  
56  
57  
58  
59  
60

1  
2  
3 status score, body mass index category, blood loss, diabetes, duration of active  
4 labour, duration of operation, urgency of risk category, and wound class). All  
5 controls must have had a post-operative length of stay at least as long as the  
6 infection free period of stay of the paired case.  
7  
8  
9  
10  
11  
12

13 Case records were linked to National Health Service (NHS) Digital Hospital Episode  
14 Statistics© (HES) Admitted Patient Care Records to derive information on diagnostic  
15 reason for readmission and length of stay. This enabled additional costs due to  
16 readmission to be calculated for: a) patients who had an infection detected during  
17 the inpatient period who were also readmitted to hospital for further treatment and b)  
18 patients whose infection was initially diagnosed at readmission.  
19  
20  
21  
22  
23  
24  
25  
26  
27

28 The average cost of excess bed days and readmissions was identified from  
29 Healthcare Resource Group data (standard groupings of clinically similar treatments  
30 which use common levels of healthcare resource listed within HES data) assigned to  
31 each patient hospital spell and linked to the National Schedule Reference Costs (the  
32 average unit cost to the NHS of providing a defined service, 2010).<sup>12</sup>  
33  
34  
35  
36  
37  
38  
39

### 40 **Community treatment costs**

41  
42 Community costs of treating and managing surgical site infection were estimated  
43 based on the assumption of one extra midwife visit, one general practitioner visit and  
44 one course of antibiotics for each surgical site infection detected by a midwife. For  
45 patient reported infections this was assumed to be one general practitioner visit and  
46 one course of antibiotics. The cost of a community midwife post-natal visit was  
47 identified from National Schedule Reference Costs and a general practitioner visit  
48 from Unit Costs of Health and Social Care (Personal Social Services Research Unit).  
49 Antibiotic costs were obtained from the NHS Drugs Tariff.<sup>13</sup>  
50  
51  
52  
53  
54  
55  
56  
57  
58  
59  
60

1  
2  
3 The proportion of patients in the study with community reported surgical site infection  
4 accompanied by positive microbiology results was employed to derive model  
5  
6 parameters for microbiological testing. Positive microbiology results were recorded  
7  
8 for 43% of the community midwife detected surgical site infections and 30% of  
9  
10 patient reported infections in the cohort study. Microbiology costs were obtained by  
11  
12 personal communication with consultant microbiologists from two NHS Trusts.  
13  
14  
15  
16  
17

### 18 **Hospital surveillance costs**

19  
20 Information on the staff time required to conduct a three-month period of surveillance  
21  
22 and administer patient questionnaires was provided by three hospitals who  
23  
24 participated in the multi-centre study. Expenses for other resources (stationery,  
25  
26 telephone calls, stamps) needed to carry out surveillance were also recorded. This  
27  
28 information was used to determine the average cost of surveillance (including gross  
29  
30 salary costs) for a hospital conducting 800 caesarean sections per year.  
31  
32  
33  
34

### 35 **Cost-benefit analysis**

36  
37 The cost-benefit model compared the total 2010 costs to the healthcare system of a  
38  
39 scenario with and without surveillance in place (healthcare provider's perspective).  
40  
41 The uncertainty around the overall costs was calculated using the appropriate  
42  
43 binomial distributions based on the sample in the study and a normal distribution for  
44  
45 the length of stay. The 95% confidence interval was obtained by running 10,000  
46  
47 simulations in @Risk 5.0 (risk analysis software) using Excel 2007.  
48  
49  
50  
51

52 The costs identified for surgical site infection following caesarean section were used  
53  
54 to model the balance of surveillance costs versus savings over a five year period  
55  
56 (with discounting of costs at 3.5% to reflect value over the time of the analysis)<sup>14</sup>  
57  
58 using Microsoft Excel. Different surveillance strategies were modelled, together with  
59  
60

1  
2  
3 three baseline infection risks and three potential average reductions in risk of  
4  
5 infection between each surveillance period.  
6  
7

8  
9 The three average rates of reduction in infection risk were selected for the model  
10  
11 given the reductions in caesarean section surgical site infection achieved during our  
12  
13 cohort study (31%), also seen in other European single site studies (70-80%  
14  
15 between interventions)<sup>15,16</sup> and observed across European surveillance networks  
16  
17 (e.g. approximately 33% over 4 years for United Kingdom, except England).<sup>17</sup>  
18  
19

20  
21 A range of scenarios were tested as follows:  
22

- 23  
24 A. baseline infection risk of 5, 10 or 15%  
25  
26 B. surveillance strategies of  
27  
28 a. one 3-month surveillance quarter a year  
29  
30 b. two 3-month surveillance quarters a year  
31  
32 c. continuous surveillance (in 3-month periods)  
33  
34 C. average reductions of 10, 20 or 30% in infection risk during each surveillance  
35  
36 period.  
37  
38  
39  
40

41  
42 When calculating reductions in surgical site infection risk the model reflected a  
43  
44 constant reduction rate over the five year period of study whereby the risk for each  
45  
46 surveillance period was iteratively calculated from the surgical site infection risk of  
47  
48 the previous surveillance period. A fourth surveillance strategy with a variable  
49  
50 programme was also modelled: continuous surveillance for hospitals with a surgical  
51  
52 site infection risk over 10%, 2 surveillance quarters a year for surgical site infection  
53  
54 risk between 5 and 10% and one surveillance period a year for surgical site infection  
55  
56 risk <5%.  
57  
58  
59  
60

1  
2  
3 The simulations assumed that average reductions in risk of disease were achieved  
4 through infection control measures taken during each surveillance period and  
5 sustained between surveillance periods. The calculations also assumed an  
6 irreducible minimum infection risk of 3% could be reached at which point no further  
7 reductions in risk of infection would be included in the model and surveillance would  
8 be reduced to one quarter per year.  
9  
10  
11  
12  
13  
14  
15  
16

### 17 **Patient and Public Involvement**

18 Patients or the public were not involved in the design, conduct, reporting or  
19 dissemination of our research.  
20  
21  
22  
23  
24  
25

## 26 **RESULTS**

### 27 **Treatment costs**

28 The estimated costs to hospital and community of surgical site infection following  
29 caesarean section at a model hospital conducting 800 caesarean sections per year  
30 are shown in Table 2. For the initial hospital stay (during which the caesarean  
31 section was performed) the difference in median length of stay for patients with an  
32 infection detected during that inpatient stay, compared to those without an infection,  
33 was five days. The number of excess days due to surgical site infection detected  
34 during the initial inpatient stay was calculated as 2.60 days (standard error 0.082)  
35 using the case-control paired matching approach to account for differences in  
36 comorbidity and factors other than the surgical site infection which may have  
37 increased length of stay.  
38  
39  
40  
41  
42  
43  
44  
45  
46  
47  
48  
49  
50  
51  
52  
53

54 Costs associated with a) subsequent readmission to hospital for further treatment of  
55 infections detected during the initial inpatient stay and b) for readmission of patients  
56 for surgical site infection, were calculated from Healthcare Resource Group data.  
57  
58  
59  
60

1  
2  
3 The cost to community healthcare of microbiological testing was estimated from the  
4 mean microbiology cost of £13.74 reported by the two NHS hospitals (including pay  
5 and consumables), together with the proportions of positive microbiology results  
6 recorded in the cohort study for community midwife detected and patient reported  
7 infections.  
8  
9  
10  
11  
12  
13  
14

15 The estimated hospital costs resulting from a 9.6% infection risk at a model hospital  
16 conducting 800 caesarean sections a year were estimated to be £13,544 with  
17 community costs estimated at £5,370, an overall cost of £18,914. Uncertainty  
18 calculations (95% confidence interval) indicated a minimum of £11,521 and  
19 maximum £29,499 with the most influential parameters being infections detected on  
20 readmission, inpatient detected infections and incidence of readmission of the  
21 patients whose surgical site infection were already detected as inpatients. The two  
22 main drivers of the uncertainty in the overall outcome were the incidence of  
23 readmission and the uncertainty around the excess length of stay. Costs were  
24 inflated to 2017 prices using the OECD Consumer Prices Index for the United  
25 Kingdom (Total less food, less energy).<sup>18</sup> This resulted in hospital costs of £15,481,  
26 Community costs of £6,138 and total cost of £21,619. If the 9.6% infection risk  
27 identified in our cohort study was applied to the 177,793 caesarean sections  
28 performed annually in England (2017-18) this would be equivalent to 17,059  
29 infections resulting in an estimated cost of £4.8 million.  
30  
31  
32  
33  
34  
35  
36  
37  
38  
39  
40  
41  
42  
43  
44  
45  
46  
47  
48  
49  
50

### 51 **Surveillance costs**

52 Information provided by participating hospitals indicated that a surveillance nurse  
53 would require time equivalent to two days a week for surveillance of 200 patients  
54 undergoing caesarean section for one quarter. The estimated cost for one quarter of  
55  
56  
57  
58  
59  
60

1  
2  
3 surveillance at the model hospital carrying out 800 caesarean sections a year was  
4  
5 calculated at £4,282 including administrative costs (Table 3).  
6  
7

### 8 9 **Modelling cost savings from surveillance**

10  
11 As might be expected, the model simulations estimating the balance of surveillance  
12  
13 expenditure versus savings covering a period of 5 years indicated that surgical site  
14  
15 infection risk reduced more quickly for the continuous surveillance strategy than for  
16  
17 either one or two quarters a year surveillance where the same baseline infection risk  
18  
19 and reductions in risk of infection were applied (Figure 2).  
20  
21  
22

23  
24 Where the hospital baseline infection risk was 10%, similar to the mean surgical site  
25  
26 infection risk in the cohort study, savings over the period of simulation were greater  
27  
28 than the costs of surveillance for all the surveillance strategies where reductions of  
29  
30 20 or 30% in the risk of infection were achieved. Breakeven was achieved by the  
31  
32 end of Year 2 (or sooner) where reductions of 30% between successive surveillance  
33  
34 periods were applied and by the end of Year 3 (or sooner) for reductions of 20%  
35  
36 (Figure 2). Net savings of £25,035 over the five year period were achieved for a  
37  
38 strategy of continuous surveillance with a 20% reduction in infection risk. The  
39  
40 simulation for a hospital with a baseline infection risk of 5% indicated that savings  
41  
42 from reducing surgical site infection risk did not offset the costs of surveillance for  
43  
44 any of the surveillance strategies.  
45  
46  
47  
48

49  
50 For a hospital with a baseline surgical site infection risk of 15%, all of the  
51  
52 surveillance strategies achieved savings greater than the costs of surveillance over  
53  
54 the 5 year period of the simulation when reductions in infection risk of 10, 20 or 30%  
55  
56 were applied. Breakeven was achieved by the end of Year 2 (or sooner) where  
57  
58 reductions of 20% and 30% at each surveillance period were applied (Figure 2). A  
59  
60



1  
2  
3 saving of £60,872 over the period of simulation was obtained for a 15% baseline  
4 infection risk achieving a 20% reduction in infections at each surveillance period and  
5 employing a continuous surveillance strategy.  
6  
7  
8  
9

10  
11 When the variable surveillance strategy was modelled (Figure 3) this responsive  
12 strategy estimated a net saving of £60,902 would be achieved for a hospital with a  
13 15% baseline infection risk achieving a 20% reduction in infections at each  
14 surveillance period (£25,694 savings for 10% infection risk with 20% reductions).  
15  
16  
17

18 For hospitals with a 15% baseline infection risk, breakeven points for the variable  
19 surveillance strategy were slightly later compared to the fixed surveillance strategies  
20 of one or two surveillance periods a year, due to the continuous surveillance  
21 component of the variable strategy. However, for a 10% baseline infection risk,  
22 breakeven was earlier or at the same time for the variable surveillance strategy  
23 compared to the original fixed surveillance strategies.  
24  
25  
26  
27  
28  
29  
30  
31  
32

33  
34  
35 Overall breakeven was reached within the 5 year simulation period with the variable  
36 surveillance strategy for scenarios where hospitals had a baseline infection risk of 10  
37 or 15% (Figure 4). The variable surveillance strategy achieved higher (5/9  
38 scenarios) or similar net savings (1/9 scenarios) compared to the original  
39 surveillance strategies for the equivalent baseline infection risk and reductions in risk  
40 of infection. The variable surveillance strategy for hospitals with a 5% baseline risk  
41 of infection was equivalent to the one surveillance period a year strategy and  
42 therefore resulted in equal losses (3/9 scenarios).  
43  
44  
45  
46  
47  
48  
49  
50  
51  
52  
53

54 A tool has been designed, based on the costs identified in this study for caesarean  
55 section, to predict the time to breakeven for a model hospital employing the variable  
56  
57  
58  
59  
60

1  
2  
3 surveillance strategy and applying self-selecting baseline infection risk, predicted  
4  
5 reductions in infection and volume of surgery (supplementary material).  
6  
7

## 8 9 **DISCUSSION**

10  
11  
12 Our study estimated that surgical site infections in caesarean section cost the  
13  
14 National Health Service in England £4.8 million a year, equating to £21,619 for a  
15  
16 typical hospital conducting 800 caesarean sections per year. Through capture and  
17  
18 assessment of the costs of surveillance, our model showed that the benefits of a  
19  
20 surveillance strategy can outweigh the costs through reductions in incidence of  
21  
22 surgical site infections.  
23  
24

25  
26  
27 Excess length of stay of patients with infection compared to patients without is  
28  
29 frequently used as a proxy for combined inpatient attributable costs. However, a  
30  
31 naïve comparison of length of stay between patients with and without a surgical site  
32  
33 infection would have produced an overestimate because it would not disentangle the  
34  
35 increased chance of detecting an infection for those patients with a prolonged length  
36  
37 of stay due to other reasons.<sup>19;20</sup> A suitable calculation method should account for  
38  
39 patient heterogeneity and timing of events to avoid biasing results. A multistate  
40  
41 model estimate which accounted for the time-dependent bias was considered,  
42  
43 however this did not naturally incorporate patient heterogeneity. An alternative  
44  
45 option was to use a confounder and time matching approach, where suitable control  
46  
47 patients should be "at risk" of acquiring an infection at the time of infection of the  
48  
49 corresponding case, which can be satisfied by using the time-to-infection as an  
50  
51 additional matching criteria. The advantage of the method used in this study, of  
52  
53 matching infected patients with similar uninfected patients with comparable length of  
54  
55 post-operative stay prior to infection, is that it produced a more accurate assessment  
56  
57  
58  
59  
60

1  
2  
3 of the excess length of stay directly attributable to the surgical site infection (2.6  
4 days) than the average excess length of stay (median 5 days).  
5  
6  
7

8  
9 The largest contribution to the overall costs (and the uncertainty) for the model  
10 hospital is the excess post-delivery length of stay and the readmission of patients. In  
11 the multicentre study the majority of infections (52%) detected at readmission and  
12 the majority of those detected during the initial inpatient stay were the more serious  
13 24% of those detected during the initial inpatient stay were the more serious  
14 infections (deep incisional or organ/space) which are likely to require more extensive  
15 treatment, such as debridement or re-suturing, than superficial infections. In contrast  
16 only 13% of midwife detected surgical site infections were deep or organ/space  
17 infections. This may explain the lower community costs for infection compared with  
18 hospital costs.  
19  
20  
21  
22  
23  
24  
25  
26  
27  
28  
29

30 Previous studies have focussed primarily on hospital costs.<sup>21;22</sup> By including an  
31 estimate of the costs in the community in this analysis a more representative  
32 estimate of overall economic burden to the health service was achieved. More than  
33 28% of the economic burden arose in the community where the majority of these  
34 infections are managed. In contrast a study conducted in Scotland in 2001, using  
35 actual rather than estimated bed days and general practitioner visits, identified 11%  
36 of treatment costs resulting from surgical site infection occurred in the community.<sup>23</sup>  
37  
38  
39 However, that study included non-obstetric surgical procedures (which would not  
40 have incurred midwife costs).  
41  
42  
43  
44  
45  
46  
47  
48  
49  
50

## 51 Limitations

52  
53  
54 As well as applying the National Schedule Reference Costs to provide the average  
55 cost of hospital stay, rather than actual observed expenditure, various assumptions  
56 have been made in this study including the number of extra midwife and general  
57  
58  
59  
60

1  
2  
3 practitioner appointments resulting from infection. However, there are likely to be  
4  
5 additional costs to those outlined. For example, some of the patients readmitted for  
6  
7 more serious infections may also require a hospital outpatient follow-up appointment  
8  
9 or further general practitioner visits. Also, more than one course of antibiotics may  
10  
11 be needed to treat infections identified by midwives and general practitioners. Given  
12  
13 that our analysis was based on healthcare utilisation, excluding additional costs  
14  
15 (direct and indirect) incurred by the affected women or their carers, the true costs  
16  
17 associated with these infections are likely to be higher than our estimates. The  
18  
19 intangible costs resulting from the pain and suffering of the women were not  
20  
21 assessed although wound infections and endometritis following caesarean section  
22  
23 have been reported to increase anxiety and delay physical recovery for these  
24  
25 women, with consequent impact on their ability to care for their new born.<sup>24</sup> Whilst  
26  
27 the majority of women will be on maternity leave, family members or other carers  
28  
29 may require time off work to look after the patient or to provide childcare for the new-  
30  
31 born or other children. An extensive prospective study would be required to gain  
32  
33 more comprehensive information on the detailed costs associated with surgical site  
34  
35 infection following caesarean section.  
36  
37  
38  
39  
40  
41  
42

43 Although the reductions in surgical site infection risk in the model are supported by  
44  
45 the data from the cohort study (Figure 1) the surveillance was only repeated once  
46  
47 and two of hospitals did not achieve reductions. Therefore, there is no guarantee  
48  
49 that such reductions would be sustained over time. Additionally, decreases in risk of  
50  
51 infection between surveillance cycles will in reality vary over time within a given  
52  
53 hospital and a constant rate of reduction in infections is unlikely to offer a true  
54  
55 reflection of this pattern. This study has applied an average reduction rate in risk of  
56  
57  
58  
59  
60

1  
2  
3 infection but, as further information becomes available on patterns of reduction, the  
4  
5 model can be adapted.  
6  
7

8  
9 There may be additional costs associated with setting up and running surveillance  
10  
11 such as training community midwives and feedback meetings with surgeons but  
12  
13 these costs can be minimised by incorporating time into existing infection prevention,  
14  
15 maternity or surgical meetings. Whilst it could be argued that surveillance drives  
16  
17 adherence to infection control practices that should be in place already, where such  
18  
19 measures are not in place additional infection prevention and control measures may  
20  
21 incur costs. However, changes to many infection prevention measures may be cost-  
22  
23 neutral and additional costs for specific interventions can be considered once  
24  
25 identified.  
26  
27

28  
29  
30 The community costs estimated in this study are not incurred by the hospital and, as  
31  
32 hospitals would not realise any savings from community care by reducing these  
33  
34 infections, this could be a disincentive to hospitals carrying out surveillance and  
35  
36 setting up new infection control measures.  
37  
38  
39

#### 40 Implications for surveillance

41  
42 Surgical site infection surveillance schemes which include feedback of results to  
43  
44 surgeons have been found to reduce risk of infections <sup>25;26</sup> and individual hospitals  
45  
46 have successfully reduced infection risk by applying measures to improve  
47  
48 practice.<sup>15;27</sup> The NICE<sup>28</sup> and WHO<sup>29</sup> guidelines for preventing surgical site infection  
49  
50 recommend various approaches to reduce infection risk including the timing of  
51  
52 antimicrobial prophylaxis, avoiding shaving, antiseptic skin preparation, maintaining  
53  
54 patient homeostasis, covering wounds with an interactive dressing and prevention of  
55  
56 hypothermia.<sup>30</sup> Whilst health services may aim to achieve a zero risk of infection, it  
57  
58  
59  
60

1  
2  
3 is likely that there is an irreducible minimum risk for some surgical categories beyond  
4 which there will be limited opportunities for further reductions. Such a possibility was  
5 built into the model. In some hospitals, high infection risks may be due to underlying  
6 systemic problems and reductions in infection risk may take longer in these more  
7 complex situations. Local needs of individual hospitals will need to be assessed.  
8  
9

10 This study estimated the cost of surveillance for one 3-month period as £4,282 for a  
11 model hospital conducting 800 caesarean sections a year. A continuous  
12 surveillance programme would provide a more rapid decrease in infection risk, when  
13 accompanied by improvements in care, than surveillance strategies of one or two  
14 quarters a year. However, although the continuous surveillance model achieved  
15 savings for hospitals with higher baseline infection risk, it did not achieve the  
16 greatest balance of saving against costs of surveillance over the 5 year simulation  
17 period for scenarios with a 10% reduction in infections between surveillance periods.  
18 The variable surveillance model achieved similar or greater savings or smaller losses  
19 for all baseline infection risks. Extrapolating from these findings, hospitals could  
20 consider a variable surveillance strategy of continuous surveillance for hospitals with  
21 high risk of infection (greater than 10%) to rapidly reduce infections and patient harm  
22 as quickly as possible. Surveillance for caesarean section could then be reduced to  
23 two quarters a year once the infection risk has decreased to 10% and to one quarter  
24 per year when the infection risk declines to 5% to maximise savings. In terms of cost  
25 saving this approach is supported by the model estimates for such a variable  
26 surveillance programme identified by this study. A minimum surveillance strategy of  
27 one quarter a year would then be useful to reinforce infection control measures and  
28 provide continued vigilance to sustain low levels of infection. However, the strategy  
29  
30  
31  
32  
33  
34  
35  
36  
37  
38  
39  
40  
41  
42  
43  
44  
45  
46  
47  
48  
49  
50  
51  
52  
53  
54  
55  
56  
57  
58  
59  
60

1  
2  
3 outlined in this model may not be applicable to other surgical categories, particularly  
4  
5 those with a low infection risk.  
6  
7

8  
9 Although a variable surveillance strategy can be less costly and can be tailored to  
10  
11 the baseline infection risk of a hospital, conducting continuous surveillance has  
12  
13 advantages. These include having well established surveillance systems with  
14  
15 methodology embedded in practice, and providing a more precise estimate of  
16  
17 infection risk where surgical volumes are low. Additional savings to those presented  
18  
19 in this study could be achieved through reducing surveillance costs, for example  
20  
21 through use of patient-facing digital technologies, currently under development, to  
22  
23 collect patient-reported infections<sup>31</sup>.  
24  
25  
26  
27

#### 28 Patient outcomes

29  
30 The number of caesarean sections performed each year in England has been rising  
31  
32 since the 1980s<sup>2</sup> accompanied by an increase in the proportion of women of child  
33  
34 bearing age who are obese.<sup>32</sup> High BMI has been identified as a key risk factor for  
35  
36 surgical site infection following caesarean section.<sup>6</sup> This means that with rising  
37  
38 obesity surgical site infections are likely to become an increasing burden for the  
39  
40 health service. Reducing the risk of infections following caesarean section is an  
41  
42 important health issue for these women who are otherwise generally young and  
43  
44 healthy.  
45  
46  
47  
48

49  
50 The multi-centre cohort study identified 1 in 10 women with surgical site infection  
51  
52 following caesarean section.<sup>6</sup> There is currently no national surveillance for surgical  
53  
54 site infection following caesarean section in England, although it is mandatory in  
55  
56 Scotland, Wales and Northern Ireland and there is considerable support from  
57  
58 hospitals to introduce this in England.<sup>33;34</sup>  
59  
60

1  
2  
3 Although costs incurred by surgical site infection following caesarean section are  
4  
5 lower than those associated with orthopaedic infections<sup>35;36</sup> infections post-  
6  
7 caesarean can still lead to serious outcomes,<sup>7;37;38</sup> and may give rise to high cost  
8  
9 clinical negligence claims.<sup>39</sup> However, the decision to attempt to reduce risk of  
10  
11 surgical site infection is not solely about cost saving. Hospitals have a duty to avoid  
12  
13 harm to the patient, reduce antibiotic consumption and improve patient experience.  
14  
15  
16

## 17 Conclusion

18  
19  
20 Surgical site infection following caesarean section causes pain and anxiety to new  
21  
22 mothers and incurs a financial burden to the healthcare system in both community and  
23  
24 hospital healthcare settings. Integrating caesarean section surveillance into the  
25  
26 national surveillance programme would provide hospitals with the infrastructure (and  
27  
28 national benchmark) for reducing infection by feeding back data and there by  
29  
30 empowering staff to take action to improve patient care and potentially reduce costs.  
31  
32  
33  
34  
35  
36  
37  
38  
39  
40  
41  
42  
43  
44  
45  
46  
47  
48  
49  
50  
51  
52  
53  
54  
55  
56  
57  
58  
59  
60



1  
2  
3 **Acknowledgements:** We would like to thank Julie Robotham (PHE) for her expert guidance  
4 as well as the hospitals who contributed information on the cost of microbiological screening  
5 and surveillance resources.  
6  
7  
8

9  
10 We would also like to thank NHS Digital for permission to reuse Hospital Episode Statistics  
11 (HES), Copyright NHS Digital © 2010. All rights reserved.  
12  
13

14  
15 **Contributors:** CW and TL designed the study. CW, JC, PH and ES sourced cost data. CW  
16 analysed the cost data, constructed the initial cost model and wrote the paper. NG  
17 conducted the paired matching analysis and AJVH calculated uncertainty and advised on the  
18 model construction and JW designed the multi-centre study. All authors critically reviewed  
19 and contributed to the final draft of the paper. TL is the guarantor.  
20  
21  
22  
23  
24  
25

26  
27 **Funding:** This research received no specific grant from any funding agency in the public,  
28 commercial or not-for-profit sectors  
29  
30

31  
32 **Competing interests:** None declared  
33

34  
35 **Ethical approval:** Not needed for this type of study  
36  
37

38  
39 **Patient consent for publication:** Not required  
40

41  
42 **Provenance and peer review:** Not commissioned; externally peer reviewed  
43

44  
45 **Data availability statement:** No additional data available  
46  
47  
48  
49  
50  
51  
52  
53  
54  
55  
56  
57  
58  
59  
60

## References

- 1  
2  
3  
4  
5  
6  
7  
8 (1) OECD. Health at a Glance 2017: OECD Indicators. OECD 2018 [cited 2018  
9 Sept. 14]; Available from: URL:[https://dx.doi.org/10.1787/health\\_glance-2017-](https://dx.doi.org/10.1787/health_glance-2017-en)  
10 [en](https://dx.doi.org/10.1787/health_glance-2017-en)
- 11  
12 (2) NHS Digital. NHS Maternity Statistics, England 2017-18. NHS Digital 2018  
13 [cited 2018 Oct. 25]; Available from: URL:[https://digital.nhs.uk/data-and-](https://digital.nhs.uk/data-and-information/publications/statistical/nhs-maternity-statistics/2017-18)  
14 [information/publications/statistical/nhs-maternity-statistics/2017-18](https://digital.nhs.uk/data-and-information/publications/statistical/nhs-maternity-statistics/2017-18)
- 15  
16 (3) Ward VP, Charlett A, Fagan J, Crawshaw SC. Enhanced surgical site  
17 infection surveillance following caesarean section: experience of a multicentre  
18 collaborative post-discharge system. *J Hosp Infect* 2008; 70(2):166-173.
- 19  
20 (4) Johnson A, Young D, Reilly J. Caesarean section surgical site infection  
21 surveillance. *J Hosp Infect* 2006; 64(1):30-35.
- 22  
23 (5) Caesarean-section surgical site infection surveillance. Annual report: all  
24 Wales. Public Health Wales 2017 [cited 2018 June 12]; Available from:  
25 URL:[http://www2.nphs.wales.nhs.uk:8080/WHAIPDocs.nsf/3dc04669c9e1eaa](http://www2.nphs.wales.nhs.uk:8080/WHAIPDocs.nsf/3dc04669c9e1eaa880257062003b246b/5b9c050161b447408025821100359f6f/$FILE/2016%20All%20Wales%20SSI%20Annual%20Report%20-%20V1.pdf)  
26 [880257062003b246b/5b9c050161b447408025821100359f6f/\\$FILE/2016%20](http://www2.nphs.wales.nhs.uk:8080/WHAIPDocs.nsf/3dc04669c9e1eaa880257062003b246b/5b9c050161b447408025821100359f6f/$FILE/2016%20All%20Wales%20SSI%20Annual%20Report%20-%20V1.pdf)  
27 [All%20Wales%20SSI%20Annual%20Report%20-%20V1.pdf](http://www2.nphs.wales.nhs.uk:8080/WHAIPDocs.nsf/3dc04669c9e1eaa880257062003b246b/5b9c050161b447408025821100359f6f/$FILE/2016%20All%20Wales%20SSI%20Annual%20Report%20-%20V1.pdf)
- 28  
29 (6) Wloch C, Wilson J, Lamagni T, Harrington P, Charlett A, Sheridan E. Risk  
30 factors for surgical site infection following caesarean section in England:  
31 results from a multicentre cohort study. *BJOG* 2012; 119(11):1324-1333.
- 32  
33 (7) Cantwell R, Clutton-Brock T, Cooper G, Dawson A, Drife J, Garrod D et al.  
34 Saving Mothers' Lives: Reviewing maternal deaths to make motherhood safer:  
35 2006-2008. The Eighth Report of the Confidential Enquiries into Maternal  
36 Deaths in the United Kingdom. *BJOG* 2011; 118(Suppl 1):1-203.
- 37  
38 (8) Haley RW, Culver DH, White JW, Morgan WM, Emori TG, Munn VP et al. The  
39 efficacy of infection surveillance and control programs in preventing  
40 nosocomial infections in US hospitals. *Am J Epidemiol* 1985; 121(2):182-205.
- 41  
42 (9) Gastmeier P, Geffers C, Brandt C, Zuschneid I, Sohr D, Schwab F et al.  
43 Effectiveness of a nationwide nosocomial infection surveillance system for  
44 reducing nosocomial infections. *J Hosp Infect* 2006; 64(1):16-22.
- 45  
46 (10) Abbas M, de Kraker MEA, Aghayev E, Astagneau P, Aupee M, Behnke M et  
47 al. Impact of participation in a surgical site infection surveillance network:  
48 results from a large international cohort study. *J Hosp Infect* 2018; DOI:  
49 [10.1016/j.jhin.2018.12.003](https://doi.org/10.1016/j.jhin.2018.12.003).
- 50  
51 (11) Wilson J, Wloch C, Saei A, McDougall C, Harrington P, Charlett A et al. Inter-  
52 hospital comparison of rates of surgical site infection following caesarean  
53 section delivery: evaluation of a multicentre surveillance study. *J Hosp Infect*  
54 2013; 84(1):44-51.
- 55  
56  
57  
58  
59  
60

- 1  
2  
3 (12) Department of Health. 2010-11reference costs publication. Gov uk 2018  
4 [cited 2018 July 25]; Available from:  
5 URL:[https://www.gov.uk/government/publications/2010-11-reference-costs-](https://www.gov.uk/government/publications/2010-11-reference-costs-publication)  
6 [publication](https://www.gov.uk/government/publications/2010-11-reference-costs-publication)  
7  
8  
9 (13) Business Services Authority. NHS Drugs Tariff. Business Services Authority  
10 2018 [cited 2018 July 25]; Available from:  
11 URL:[https://www.nhsbsa.nhs.uk/pharmacies-gp-practices-and-appliance-](https://www.nhsbsa.nhs.uk/pharmacies-gp-practices-and-appliance-contractors/drug-tariff)  
12 [contractors/drug-tariff](https://www.nhsbsa.nhs.uk/pharmacies-gp-practices-and-appliance-contractors/drug-tariff)  
13  
14 (14) National Institute for Health and Care Excellence. Guide to methods of  
15 technology appraisal 2013. [https://www.nice.org](https://www.nice.org.uk/process/pmg9/chapter/foreword)  
16 [uk/process/pmg9/chapter/foreword](https://www.nice.org.uk/process/pmg9/chapter/foreword) 2013 [cited 2017 July 6]; Available from:  
17 URL:<https://www.nice.org.uk/process/pmg9/chapter/foreword>  
18  
19 (15) Dyrkorn OA, Kristoffersen M, Walberg M. Reducing post-caesarean surgical  
20 wound infection rate: an improvement project in a Norwegian maternity clinic.  
21 *BMJ Qual Saf* 2012; 21(3):206-210.  
22  
23 (16) Corcoran S, Jackson V, Coulter-Smith S, Loughrey J, McKenna P, Cafferkey  
24 M. Surgical site infection after cesarean section: implementing 3 changes to  
25 improve the quality of patient care. *Am J Infect Control* 2013; 41(12):1258-  
26 1263.  
27  
28 (17) European Centre for Disease Prevention and Control. Surveillance of surgical  
29 site infections in Europe, 2010-2011. European Centre for Disease Prevention  
30 and Control 2013 Available from:  
31 URL:[http://ecdc.europa.eu/en/publications/Publications/SSI-in-europe-2010-](http://ecdc.europa.eu/en/publications/Publications/SSI-in-europe-2010-2011.pdf)  
32 [2011.pdf](http://ecdc.europa.eu/en/publications/Publications/SSI-in-europe-2010-2011.pdf)  
33  
34 (18) OECD. Inflation (CPI)(Indicator). OECD 2019 [cited 2019 Jan. 16]; Available  
35 from: URL: doi: 10.1787/eee82e6e-en  
36  
37 (19) Kappstein I, Schulgen G, Beyer U, Geiger K, Schumacher M, Daschner FD.  
38 Prolongation of hospital stay and extra costs due to ventilator-associated  
39 pneumonia in an intensive care unit. *Eur J Clin Microbiol Infect Dis* 1992;  
40 11(6):504-508.  
41  
42 (20) De AG, Murthy A, Beyersmann J, Harbarth S. Estimating the impact of  
43 healthcare-associated infections on length of stay and costs. *Clin Microbiol*  
44 *Infect* 2010; 16(12):1729-1735.  
45  
46 (21) Mugford M, Kingston J, Chalmers I. Reducing the incidence of infection after  
47 caesarean section: implications of prophylaxis with antibiotics for hospital  
48 resources. *BMJ* 1989; 299(6706):1003-1006.  
49  
50 (22) Olsen MA, Butler AM, Willers DM, Gross GA, Hamilton BH, Fraser VJ.  
51 Attributable costs of surgical site infection and endometritis after low  
52 transverse cesarean delivery. *Infect Control Hosp Epidemiol* 2010; 31(3):276-  
53 282.  
54  
55  
56  
57  
58  
59  
60

- 1  
2  
3 (23) Reilly J, Twaddle S, McIntosh J, Kean L. An economic analysis of surgical  
4 wound infection. *J Hosp Infect* 2001; 49(4):245-249.  
5  
6 (24) Kealy MA, Small RE, Liamputtong P. Recovery after caesarean birth: a  
7 qualitative study of women's accounts in Victoria, Australia. *BMC Pregnancy*  
8 *Childbirth* 2010; 10:47.  
9  
10 (25) Barwolff S, Sohr D, Geffers C, Brandt C, Vonberg RP, Halle H et al.  
11 Reduction of surgical site infections after Caesarean delivery using  
12 surveillance. *J Hosp Infect* 2006; 64(2):156-161.  
13  
14 (26) Astagneau P, L'Heriteau F, Daniel F, Parneix P, Venier AG, Malavaud S et al.  
15 Reducing surgical site infection incidence through a network: results from the  
16 French ISO-RAISIN surveillance system. *J Hosp Infect* 2009; 72(2):127-134.  
17  
18 (27) Gregson H. Reducing surgical site infection following caesarean section. *Nurs*  
19 *Stand* 2011; 25(50):35-40.  
20  
21 (28) National Collaborating Centre for Women's and Children's Health. Surgical  
22 site infection - prevention and treatment of surgical site infection. Clinical  
23 Guideline 74. NICE 2008 [cited 2015 Oct. 23]; Available from:  
24 URL:<http://www.nice.org.uk/guidance/CG74>  
25  
26 (29) World Health Organisation. Global guidelines for the prevention of surgical  
27 site infection. <http://www.who.int/gpsc/ssi-guidelines/en/> 2016 [cited 2017  
28 July 6]; Available from: URL:<http://www.who.int/gpsc/ssi-guidelines/en/>  
29  
30 (30) National Institute for Health and Care Excellence. Hypothermia: prevention  
31 and management in adults having surgery, CG65. [https://www.nice.org](https://www.nice.org.uk/guidance/cg65)  
32 [uk/guidance/cg65](https://www.nice.org.uk/guidance/cg65) 2016 [cited 2017 July 6]; Available from:  
33 URL:<https://www.nice.org.uk/guidance/cg65>  
34  
35 (31) Public Health England. Surveillance of surgical site infections in NHS  
36 hospitals in England 2015/16. Public Health England 2016 Available from:  
37 URL:[https://www.gov.uk/government/publications/surgical-site-infections-ssi-](https://www.gov.uk/government/publications/surgical-site-infections-ssi-surveillance-nhs-hospitals-in-england)  
38 [surveillance-nhs-hospitals-in-england](https://www.gov.uk/government/publications/surgical-site-infections-ssi-surveillance-nhs-hospitals-in-england)  
39  
40 (32) Health Survey for England, 2016. NHS Digital 2017 Available from:  
41 URL:[https://digital.nhs.uk/data-and-information/publications/statistical/health-](https://digital.nhs.uk/data-and-information/publications/statistical/health-survey-for-england/health-survey-for-england-2016)  
42 [survey-for-england/health-survey-for-england-2016](https://digital.nhs.uk/data-and-information/publications/statistical/health-survey-for-england/health-survey-for-england-2016)  
43  
44 (33) Health Protection Scotland. Pan Celtic Collaborative Surgical Site Infection  
45 Surveillance Report: Surveillance of surgical site infection for caesarean  
46 section procedures performed in Northern Ireland, Scotland and Wales in  
47 2008. 2014. Health Protection Scotland. 17-1-2014.  
48  
49 (34) Godbole G, Wloch C, Harrington P, Verlander NQ, Hopkins S, Johnson AP et  
50 al. Future priorities of acute hospitals for surgical site infection surveillance in  
51 England. *J Hosp Infect* 2018.  
52  
53  
54  
55  
56  
57  
58  
59  
60

- 1  
2  
3 (35) Coello R, Charlett A, Wilson J, Ward V, Pearson A, Borriello SP. Adverse  
4 impact of surgical site infections in English hospitals. *J Hosp Infect* 2005;  
5 60(2):93-103.  
6  
7 (36) Merollini KM, Crawford RW, Whitehouse SL, Graves N. Surgical site infection  
8 prevention following total hip arthroplasty in Australia: a cost-effectiveness  
9 analysis. *Am J Infect Control* 2013; 41(9):803-809.  
10  
11 (37) Schumacher H, Tehrani H, Irwin MS, Malata CM. Abdominoplasty as an  
12 adjunct to the management of peri-Caesarian section necrotising fasciitis. *J*  
13 *Plast Reconstr Aesthet Surg* 2008; 61(7):807-810.  
14  
15 (38) Melendez J, Claxton A, Erskine K. MRSA bacteraemia after caesarean  
16 section wound infection: when screening is missed and things go wrong. *Arch*  
17 *Gynecol Obstet* 2012; 285(3):663-665.  
18  
19 (39) National Audit Office. Managing the costs of clinical negligence in trusts.  
20 National Audit Office 2017 [cited 2018 Nov. 1]; Available from:  
21 URL:[https://www.nao.org.uk/report/managing-the-costs-of-clinical-negligence-](https://www.nao.org.uk/report/managing-the-costs-of-clinical-negligence-in-trusts/)  
22 [in-trusts/](https://www.nao.org.uk/report/managing-the-costs-of-clinical-negligence-in-trusts/)  
23  
24  
25  
26  
27  
28  
29  
30  
31  
32  
33  
34  
35  
36  
37  
38  
39  
40  
41  
42  
43  
44  
45  
46  
47  
48  
49  
50  
51  
52  
53  
54  
55  
56  
57  
58  
59  
60

**Table 1. Parameters for surgical site infection (SSI) risk used in the model**

| Detection method                               | Infection risk |
|------------------------------------------------|----------------|
| All methods combined                           | 9.59%          |
| Inpatient detected                             | 0.51%          |
| Inpatient detected SSI subsequently readmitted | 0.05%          |
| Readmission detected                           | 0.56%          |
| Community Midwife detected                     | 5.31%          |
| Self-reported by patient                       | 3.21%          |

For peer review only

**Table 2.** Estimated annual hospital and community costs to the NHS arising due to surgical site infection following caesarean section for a model hospital conducting 800 caesarean sections per year

| Treatment stage                                  | Item                                    | Estimate  | (95% CI)*      | Hospital costs (£) | Community costs (£) | Total costs (£) | (95% CI)*                   | †Inflated costs  |
|--------------------------------------------------|-----------------------------------------|-----------|----------------|--------------------|---------------------|-----------------|-----------------------------|------------------|
| <b>Infections detected during inpatient stay</b> | a Excess length of stay (days)**        | 2.6       | (2.44 to 2.76) |                    |                     |                 |                             |                  |
|                                                  | b Value per bed day                     | £444.00   |                |                    |                     |                 |                             |                  |
|                                                  | c No. cases (0.51% of 800 women)        | 4.1       | (2.3 to 5.8)   |                    |                     |                 |                             |                  |
|                                                  | <b>Total = (a*b*c)</b>                  |           |                | <b>£4,722.82</b>   |                     |                 |                             | <b>£5,398.25</b> |
| Inpatient detected SSI subsequently readmitted   | a Average HRG cost per spell            | £1,092.20 |                |                    |                     |                 |                             |                  |
|                                                  | b Spells per patient                    | 1         |                |                    |                     |                 |                             |                  |
|                                                  | c No. cases (0.05% of 800 women)        | 0.4       | (0 to 1)       |                    |                     |                 |                             |                  |
|                                                  | <b>Total = (a*b*c)</b>                  |           |                | <b>£428.14</b>     |                     |                 |                             | <b>£489.37</b>   |
| <b>Infections detected at readmission</b>        | a Average HRG cost per spell            | £1,387.67 |                |                    |                     |                 |                             |                  |
|                                                  | b Spells per patient                    | 1.35      |                |                    |                     |                 |                             |                  |
|                                                  | c No. cases (0.56% of 800 women)        | 4.5       | (2.7 to 6.2)   |                    |                     |                 |                             |                  |
|                                                  | <b>Total = (a*b*c)</b>                  |           |                | <b>£8,392.63</b>   |                     |                 |                             | <b>£9,592.90</b> |
| <b>Infections detected by community midwife</b>  | a 1 extra midwife visit                 | £63.00    |                |                    |                     |                 |                             |                  |
|                                                  | b 1 extra visit to GP                   | £30.00    |                |                    |                     |                 |                             |                  |
|                                                  | c 1 course antibiotics                  | £4.27     |                |                    |                     |                 |                             |                  |
|                                                  | d Microbiology (£13.74)*43%             | £5.91     |                |                    |                     |                 |                             |                  |
|                                                  | e No. cases (5.31% of 800 women)        | 42.4      | (37.0 to 47.8) |                    |                     |                 |                             |                  |
|                                                  | <b>Total (a+b+c+d)*e</b>                |           |                |                    | <b>£4,383.01</b>    |                 |                             | <b>£5,009.84</b> |
| <b>Self reported infections</b>                  | a 1 extra visit to general practitioner | £30.00    |                |                    |                     |                 |                             |                  |
|                                                  | b 1 course antibiotics (£4.27)          | £4.27     |                |                    |                     |                 |                             |                  |
|                                                  | c Microbiology (£13.74)*30%             | £4.12     |                |                    |                     |                 |                             |                  |
|                                                  | d No. cases (3.21% of 800 women)        | 25.7      | (21.4 to 30.0) |                    |                     |                 |                             |                  |
| <b>Total = (a+b+c)*d</b>                         |                                         |           |                | <b>£987.14</b>     |                     |                 | <b>£1,128.32</b>            |                  |
| <b>Total costs</b>                               |                                         |           |                | <b>£13,544</b>     | <b>£5,370</b>       | <b>£18,914</b>  | <b>(£11,521 to £29,499)</b> | <b>£21,619</b>   |

\*CI=Confidence Interval. \*\*Normal distribution assumed. †Inflated to 2017 prices using UK Consumer Price Index – Total less food, less energy (OECD Data)

HRG=Healthcare Resource Group

**Table 3.** Estimated costs for a 3-month surveillance period for surgical site infection following caesarean section for a model hospital conducting 800 caesarean sections per year

| Surveillance       | Item | Surveillance                                            | Total            | Inflated costs†  |
|--------------------|------|---------------------------------------------------------|------------------|------------------|
| Surveillance nurse | a    | 0.4 equivalent Band 6 Surveillance nurse (24% on costs) | £14,614          |                  |
|                    | b    | 1 surveillance quarter                                  | 0.25             |                  |
|                    |      | Total (a*b)                                             |                  | £3,653.54        |
| Administration     | a    | Stationery/photocopying/stamps/phone calls              | £0.47            |                  |
|                    | b    | Patients in surveillance quarter                        | 200              |                  |
|                    |      | Total (a*b)                                             |                  | £93.00           |
| <b>Total cost</b>  |      |                                                         | <b>£3,746.54</b> | <b>£4,282.35</b> |

†Inflated to 2017 prices using UK Consumer Price Index – Total less food, less energy (OECD Data)



**Figure 1.** Change in surgical site infection (SSI) risk between consecutive 3 month surveillance periods for 7 hospitals during the multi-centre caesarean section study

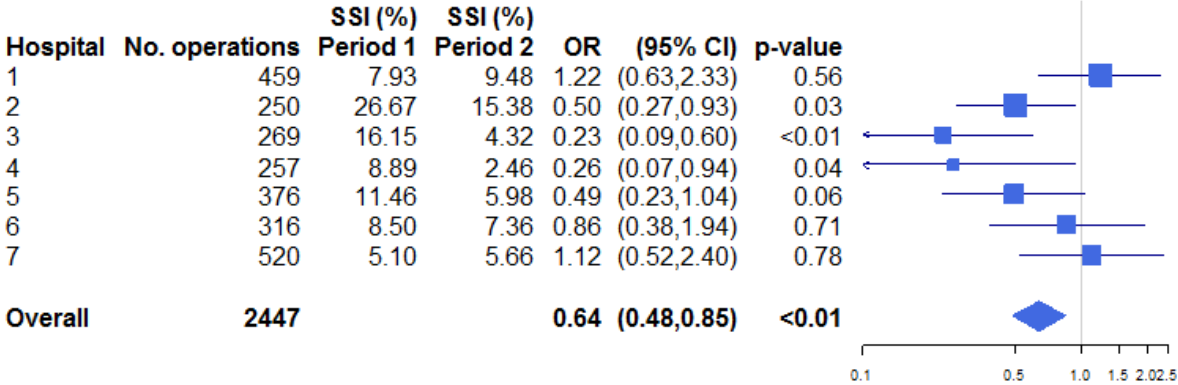

**Figure 2.** Balance of surveillance cost versus savings from reductions of 10, 20 and 30% per surveillance period for surveillance strategies of one quarter a year, two quarters a year and continuous surveillance for starting surgical site infection (SSI) risk of 5, 10 or 15%

Model assumes reductions in infection risk are achieved in conjunction with improvement programmes during surveillance periods and maintained between each surveillance period. No further reductions in risk of infection were included in the model once a postulated minimum SSI risk of 3% was reached.

**Key:** Surveillance strategy      Reductions in SSI risk

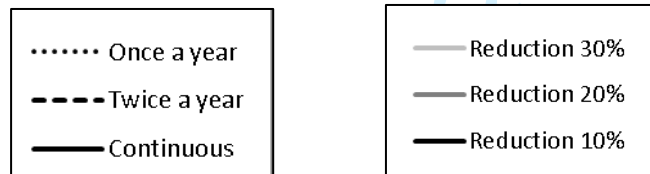

2a. Baseline SSI risk 5%, i) SSI risk (%)

ii) balance of discounted cost versus savings

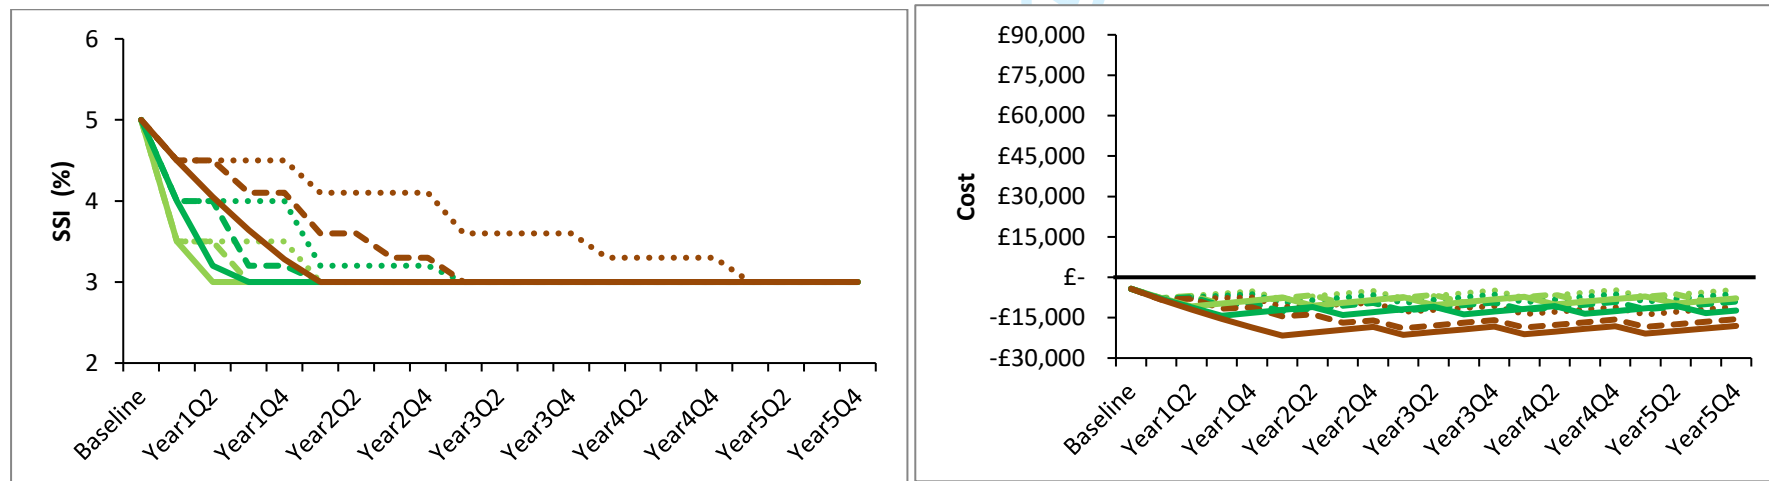

2b. Baseline SSI risk 10%, i) SSI risk (%)

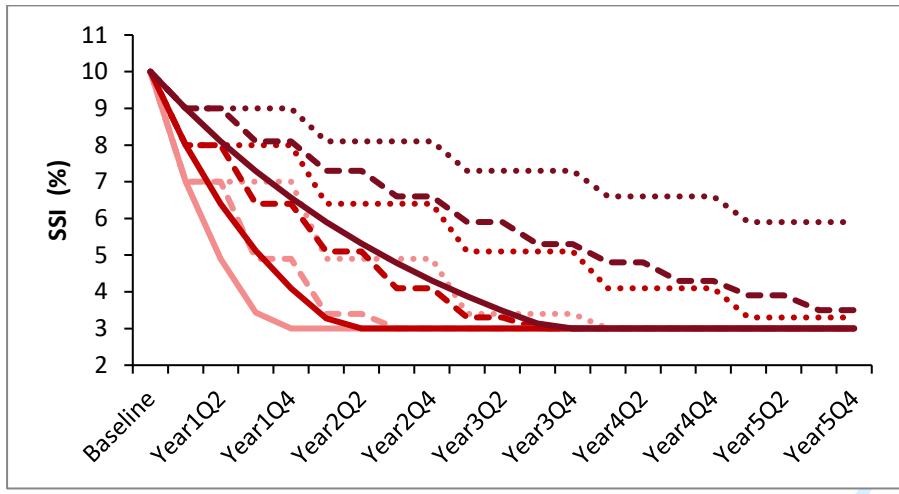

ii) balance of discounted cost versus savings

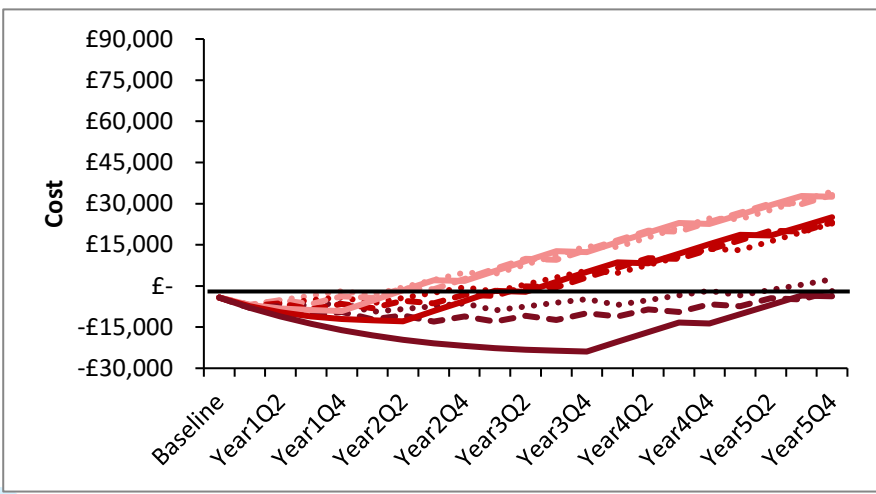

2c. Baseline SSI risk 15%, i) SSI risk (%)

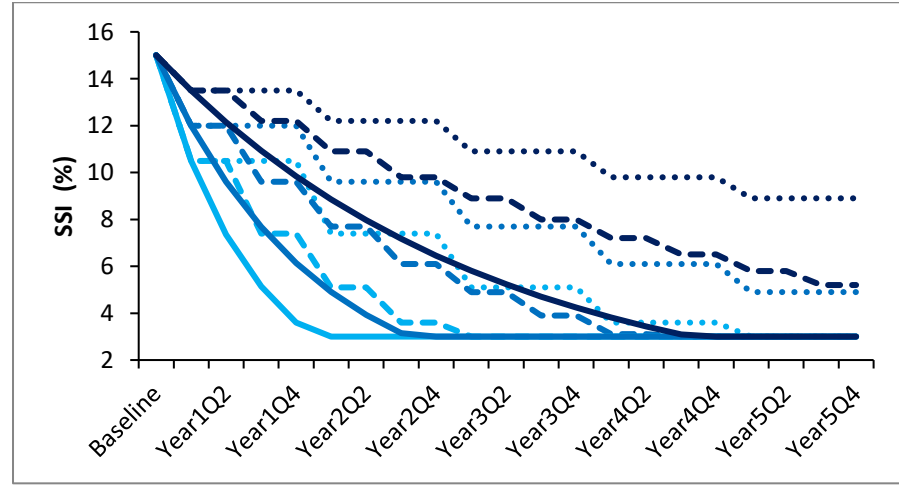

ii) balance of discounted cost versus savings

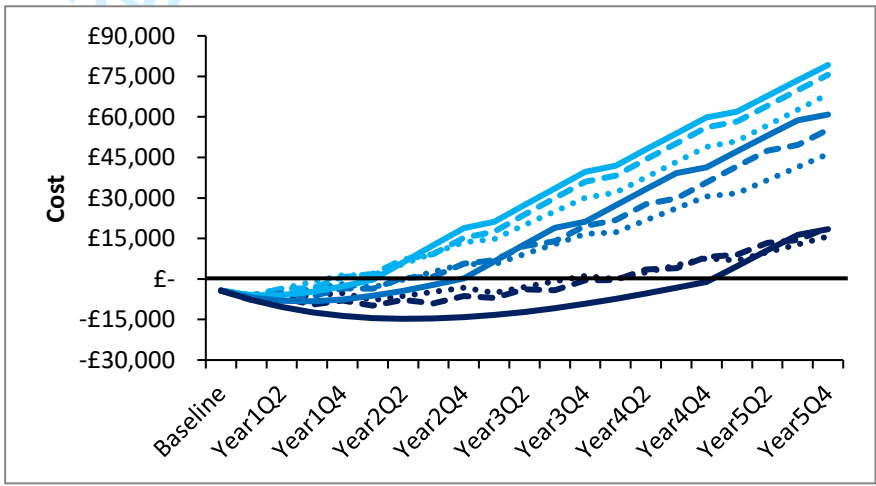

**Figure 3.** Balance of surveillance cost versus savings from reductions in surgical site infection risk of 10, 20 and 30% per surveillance period for baseline surgical site infection (SSI) risk of 10 or 15% using a variable surveillance strategy (continuous surveillance when the infection risk is above 10%, two quarters per year surveillance for infection risk between 5 and 10% and one quarter per year surveillance for infection risk below 5%)

Model assumes reductions in risk of infection are achieved in conjunction with improvement programmes during surveillance periods and maintained between each surveillance period. No further reductions in risk of infection were included once a postulated minimum SSI risk of 3% was reached.

Key: Reductions in risk      Baseline SSI risk

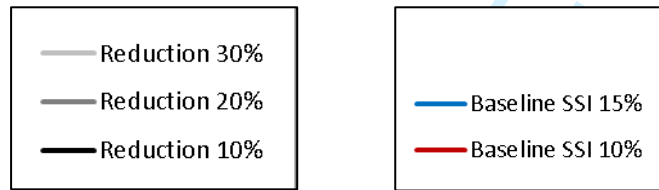

i) SSI risk (%)

ii) balance of discounted cost versus savings

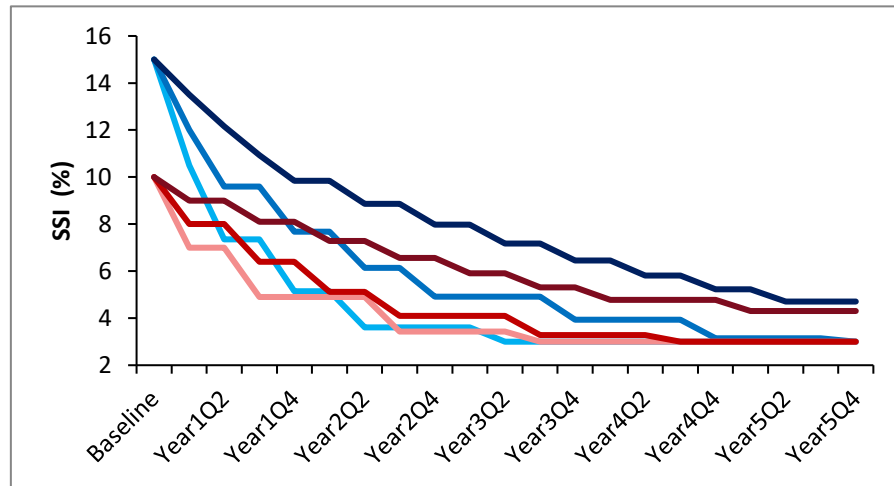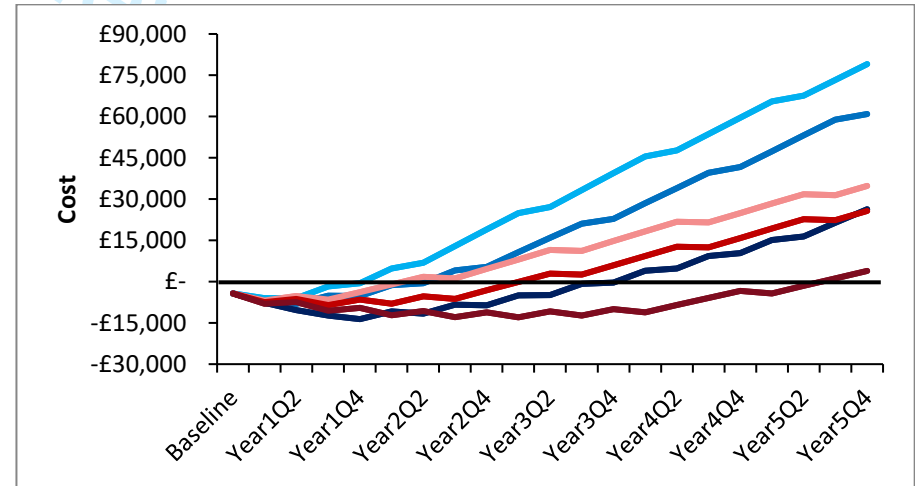

**Figure 4** Cumulative discounted prevented costs against costs of surveillance after 5 year surveillance programme

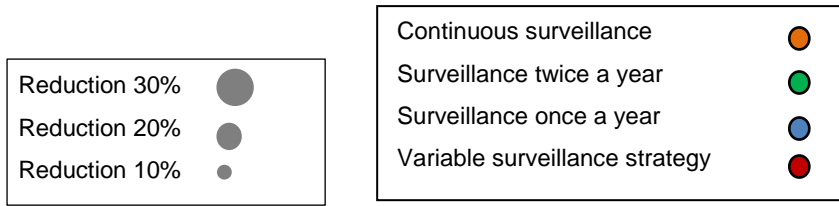

A. 15% Baseline surgical site infection risk

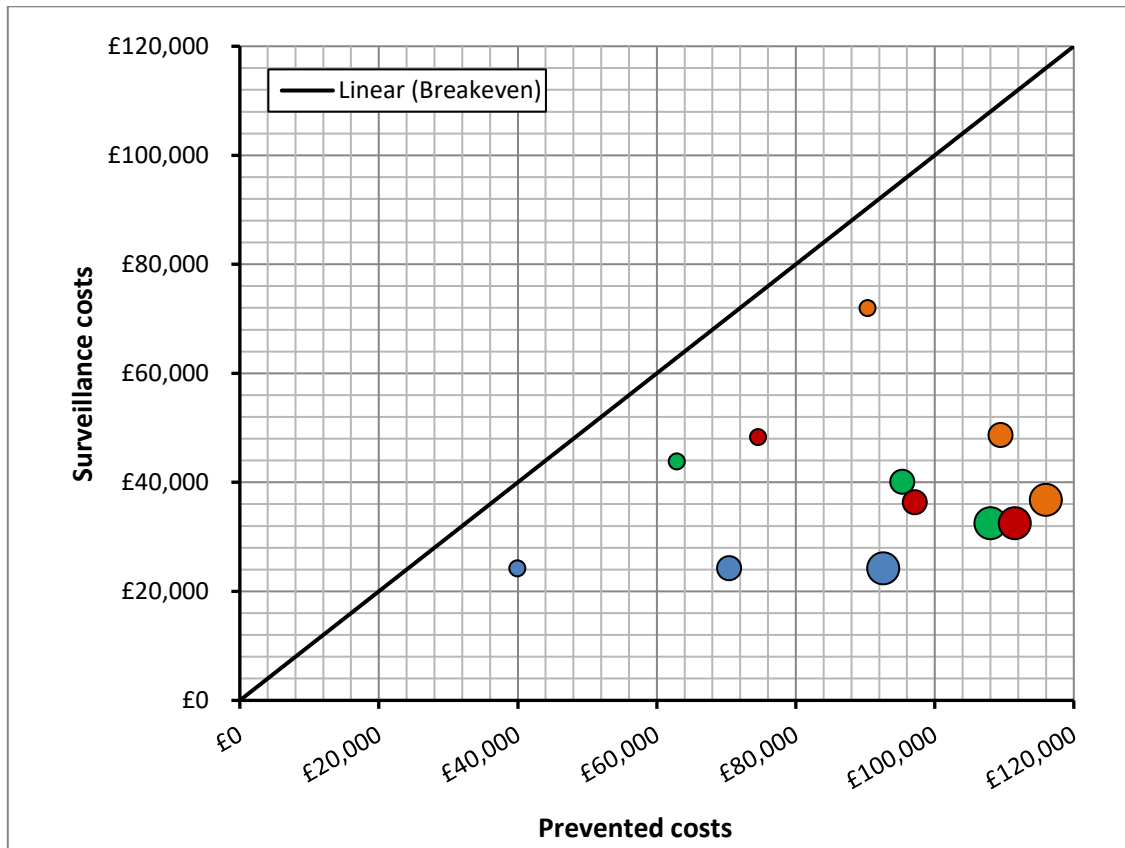

B. 10% baseline surgical site infection risk

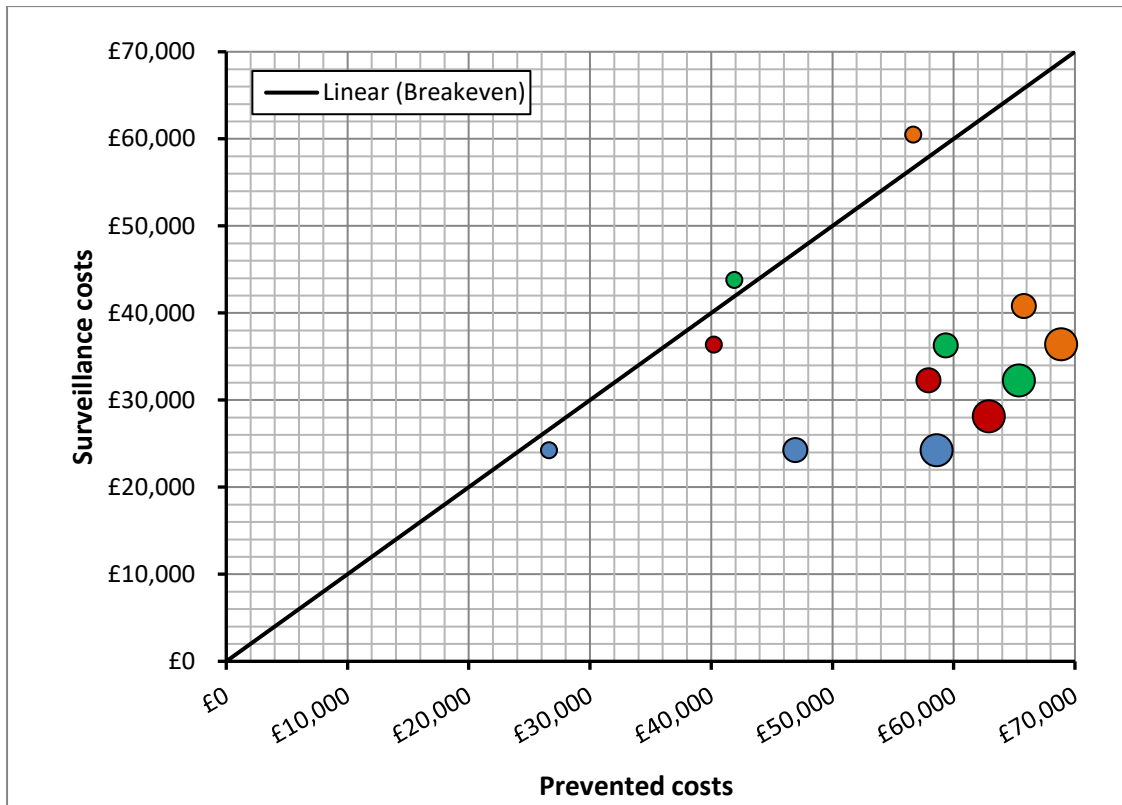

C. 5% baseline surgical site infection risk

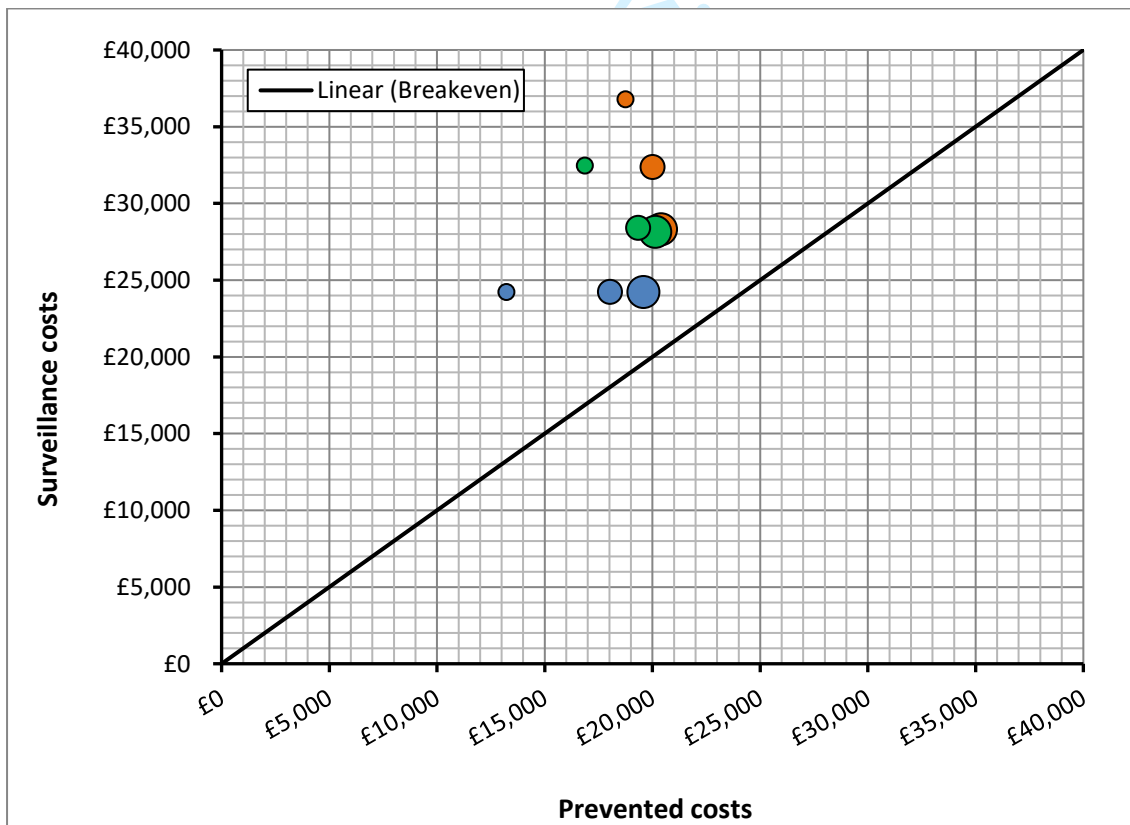

\*Variable surveillance strategy is equivalent to once-a-year surveillance where SSI risk is <5%

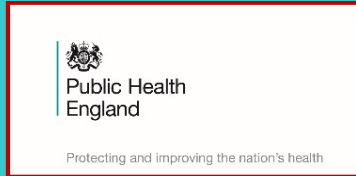

## Model of cost saving from reductions in surgical site

This tool is designed to estimate the time to breakeven as a result of  
based on a variable surveillance strategy:

- \* continuous surveillance where SSI risk >10%
- \* two 3-month surveillance periods a year where SSI risk >5% but <
- \* one 3-month surveillance period a year where SSI risk <5%

The simulations assume that reductions in disease risk are achieved  
period and sustained from one surveillance period to the next. Once

Please click on the 'Model' tab to enter the volume of surgery, base

For peer review only

### Surveillance of surgical site infection (SSI) following caesarean section versus surveillance costs

Costs of surveillance for SSI following C-section and savings due to potential reductions in SSI rate

Baseline SSI%  $\leq 10\%$

When used in conjunction with infection control improvement programmes during each surveillance cycle, once a postulated irreducible minimum SSI risk of 3% is reached no further reductions are expected.

Calculate baseline SSI% and expected reduction in SSI risk for your hospital

For peer review only



1  
2  
3  
4  
5  
6  
7  
8  
9  
10  
11  
12  
13  
14  
15  
16  
17  
18  
19  
20  
21  
22  
23  
24  
25  
26  
27  
28  
29  
30  
31  
32  
33  
34  
35  
36  
37  
38  
39  
40  
41  
42  
43  
44  
45  
46  
47  
48  
49  
50  
51  
52  
53  
54  
55  
56  
57  
58  
59  
60

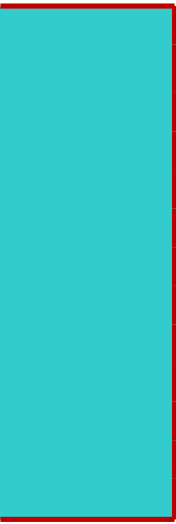

For peer review only

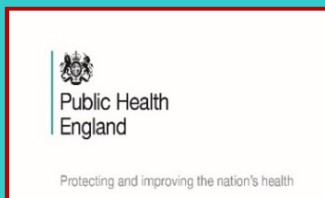

**No. C-section per year**  
**Baseline SSI rate (>3.0%)**  
**Reduction SSI due to action (%)**  
**Discounting**

|              |
|--------------|
| <b>800</b>   |
| <b>10</b>    |
| <b>20%</b>   |
| <b>3.50%</b> |

| Period   | Discounting | Total cost of disease per quarter | Total costs discounted | SSI rate reduction (%) |
|----------|-------------|-----------------------------------|------------------------|------------------------|
| Baseline | 0           | £5,630                            | £5,630                 | 10.00                  |
| Year1Q1  | 0.125       | £5,630                            | £5,606                 | 8.00                   |
| Year1Q2  | 0.375       | £5,630                            | £5,558                 | 8.00                   |
| Year1Q3  | 0.625       | £5,630                            | £5,510                 | 6.40                   |
| Year1Q4  | 0.875       | £5,630                            | £5,463                 | 6.40                   |
| Year2Q1  | 1.125       | £5,630                            | £5,416                 | 5.12                   |
| Year2Q2  | 1.375       | £5,630                            | £5,370                 | 5.12                   |
| Year2Q3  | 1.625       | £5,630                            | £5,324                 | 4.10                   |
| Year2Q4  | 1.875       | £5,630                            | £5,278                 | 4.10                   |
| Year3Q1  | 2.125       | £5,630                            | £5,233                 | 4.10                   |
| Year3Q2  | 2.375       | £5,630                            | £5,188                 | 4.10                   |
| Year3Q3  | 2.625       | £5,630                            | £5,144                 | 3.28                   |
| Year3Q4  | 2.875       | £5,630                            | £5,100                 | 3.28                   |
| Year4Q1  | 3.125       | £5,630                            | £5,056                 | 3.3                    |
| Year4Q2  | 3.375       | £5,630                            | £5,013                 | 3.3                    |
| Year4Q3  | 3.625       | £5,630                            | £4,970                 | 2.6                    |
| Year4Q4  | 3.875       | £5,630                            | £4,927                 | 2.6                    |
| Year5Q1  | 4.125       | £5,630                            | £4,885                 | 2.6                    |
| Year5Q2  | 4.375       | £5,630                            | £4,843                 | 2.6                    |
| Year5Q3  | 4.625       | £5,630                            | £4,802                 | 2.1                    |
| Year5Q4  | 4.875       | £5,630                            | £4,761                 | 2.1                    |
| Year6Q1  | 5.125       | £5,630                            | £4,720                 | 2.1                    |
| Year6Q2  | 5.375       | £5,630                            | £4,679                 | 2.1                    |
| Year6Q3  | 5.625       | £5,630                            | £4,639                 | 1.7                    |
| Year6Q4  | 5.875       | £5,630                            | £4,600                 | 1.7                    |
| Year7Q1  | 6.125       | £5,630                            | £4,560                 | 1.7                    |
| Year7Q2  | 6.375       | £5,630                            | £4,521                 | 1.7                    |
| Year7Q3  | 6.625       | £5,630                            | £4,482                 | 1.3                    |
| Year7Q4  | 6.875       | £5,630                            | £4,444                 | 1.3                    |
| Year8Q1  | 7.125       | £5,630                            | £4,406                 | 1.3                    |
| Year8Q2  | 7.375       | £5,630                            | £4,368                 | 1.3                    |
| Year8Q3  | 7.625       | £5,630                            | £4,331                 | 1.1                    |
| Year8Q4  | 7.875       | £5,630                            | £4,294                 | 1.1                    |
| Year9Q1  | 8.125       | £5,630                            | £4,257                 | 1.1                    |
| Year9Q2  | 8.375       | £5,630                            | £4,221                 | 1.1                    |
| Year9Q3  | 8.625       | £5,630                            | £4,184                 | 0.9                    |

|    |          |        |        |        |     |
|----|----------|--------|--------|--------|-----|
| 1  |          |        |        |        |     |
| 2  | Year9Q4  | 8.875  | £5,630 | £4,149 | 0.9 |
| 3  | Year10Q1 | 9.125  | £5,630 | £4,113 | 0.9 |
| 4  | Year10Q2 | 9.375  | £5,630 | £4,078 | 0.9 |
| 5  | Year10Q3 | 9.625  | £5,630 | £4,043 | 0.7 |
| 6  | Year10Q4 | 9.875  | £5,630 | £4,008 | 0.7 |
| 7  |          |        |        |        |     |
| 8  | Year11Q1 | 10.125 | £5,630 | £3,974 | 0.7 |
| 9  | Year11Q2 | 10.375 | £5,630 | £3,940 | 0.7 |
| 10 | Year11Q3 | 10.625 | £5,630 | £3,906 | 0.5 |
| 11 | Year11Q4 | 10.875 | £5,630 | £3,873 | 0.5 |
| 12 |          |        |        |        |     |
| 13 | Year12Q1 | 11.125 | £5,630 | £3,840 | 0.5 |
| 14 | Year12Q2 | 11.375 | £5,630 | £3,807 | 0.5 |
| 15 | Year12Q3 | 11.625 | £5,630 | £3,774 | 0.4 |
| 16 | Year12Q4 | 11.875 | £5,630 | £3,742 | 0.4 |
| 17 | Year13Q1 | 12.125 | £5,630 | £3,710 | 0.4 |
| 18 | Year13Q2 | 12.375 | £5,630 | £3,678 | 0.4 |
| 19 |          |        |        |        |     |
| 20 | Year13Q3 | 12.625 | £5,630 | £3,647 | 0.4 |
| 21 | Year13Q4 | 12.875 | £5,630 | £3,615 | 0.4 |
| 22 | Year14Q1 | 13.125 | £5,630 | £3,584 | 0.4 |
| 23 | Year14Q2 | 13.375 | £5,630 | £3,554 | 0.4 |
| 24 |          |        |        |        |     |
| 25 | Year14Q3 | 13.625 | £5,630 | £3,523 | 0.3 |
| 26 | Year14Q4 | 13.875 | £5,630 | £3,493 | 0.3 |
| 27 | Year15Q1 | 14.125 | £5,630 | £3,463 | 0.3 |
| 28 | Year15Q2 | 14.375 | £5,630 | £3,433 | 0.3 |
| 29 | Year15Q3 | 14.625 | £5,630 | £3,404 | 0.2 |
| 30 | Year15Q4 | 14.875 | £5,630 | £3,375 | 0.2 |
| 31 |          |        |        |        |     |
| 32 | Year16Q1 | 15.125 | £5,630 | £3,346 | 0.2 |
| 33 | Year16Q2 | 15.375 | £5,630 | £3,317 | 0.2 |
| 34 | Year16Q3 | 15.625 | £5,630 | £3,289 | 0.2 |
| 35 | Year16Q4 | 15.875 | £5,630 | £3,261 | 0.2 |
| 36 |          |        |        |        |     |
| 37 | Year17Q1 | 16.125 | £5,630 | £3,233 | 0.2 |
| 38 | Year17Q2 | 16.375 | £5,630 | £3,205 | 0.2 |
| 39 | Year17Q3 | 16.625 | £5,630 | £3,178 | 0.1 |
| 40 | Year17Q4 | 16.875 | £5,630 | £3,151 | 0.1 |
| 41 | Year18Q1 | 17.125 | £5,630 | £3,124 | 0.1 |
| 42 | Year18Q2 | 17.375 | £5,630 | £3,097 | 0.1 |
| 43 |          |        |        |        |     |
| 44 | Year18Q3 | 17.625 | £5,630 | £3,070 | 0.1 |
| 45 | Year18Q4 | 17.875 | £5,630 | £3,044 | 0.1 |
| 46 | Year19Q1 | 18.125 | £5,630 | £3,018 | 0.1 |
| 47 | Year19Q2 | 18.375 | £5,630 | £2,992 | 0.1 |
| 48 |          |        |        |        |     |
| 49 | Year19Q3 | 18.625 | £5,630 | £2,966 | 0.1 |
| 50 | Year19Q4 | 18.875 | £5,630 | £2,941 | 0.1 |
| 51 | Year20Q1 | 19.125 | £5,630 | £2,916 | 0.1 |
| 52 | Year20Q2 | 19.375 | £5,630 | £2,891 | 0.1 |
| 53 | Year20Q3 | 19.625 | £5,630 | £2,866 | 0.1 |
| 54 | Year20Q4 | 19.875 | £5,630 | £2,842 | 0.1 |
| 55 |          |        |        |        |     |
| 56 | Year21Q1 | 20.125 | £5,630 | £2,817 | 0.1 |
| 57 | Year21Q2 | 20.375 | £5,630 | £2,793 | 0.1 |
| 58 | Year21Q3 | 20.625 | £5,630 | £2,769 | 0.1 |
| 59 | Year21Q4 | 20.875 | £5,630 | £2,745 | 0.1 |
| 60 | Year22Q1 | 21.125 | £5,630 | £2,722 | 0.1 |

|    |          |        |        |        |     |
|----|----------|--------|--------|--------|-----|
| 1  |          |        |        |        |     |
| 2  | Year22Q2 | 21.375 | £5,630 | £2,699 | 0.1 |
| 3  | Year22Q3 | 21.625 | £5,630 | £2,676 | 0.0 |
| 4  | Year22Q4 | 21.875 | £5,630 | £2,653 | 0.0 |
| 5  | Year23Q1 | 22.125 | £5,630 | £2,630 | 0.0 |
| 6  | Year23Q2 | 22.375 | £5,630 | £2,607 | 0.0 |
| 7  | Year23Q3 | 22.625 | £5,630 | £2,585 | 0.0 |
| 8  | Year23Q4 | 22.875 | £5,630 | £2,563 | 0.0 |
| 9  | Year24Q1 | 23.125 | £5,630 | £2,541 | 0.0 |
| 10 | Year24Q2 | 23.375 | £5,630 | £2,519 | 0.0 |
| 11 | Year24Q3 | 23.625 | £5,630 | £2,498 | 0.0 |
| 12 | Year24Q4 | 23.875 | £5,630 | £2,476 | 0.0 |
| 13 | Year25Q1 | 24.125 | £5,630 | £2,455 | 0.0 |
| 14 | Year25Q2 | 24.375 | £5,630 | £2,434 | 0.0 |
| 15 | Year25Q3 | 24.625 | £5,630 | £2,413 | 0.0 |
| 16 | Year25Q4 | 24.875 | £5,630 | £2,393 | 0.0 |
| 17 | Year26Q5 | 25.125 | £5,630 | £2,372 | 0.0 |
| 18 | Year26Q6 | 25.375 | £5,630 | £2,352 | 0.0 |
| 19 | Year26Q7 | 25.625 | £5,630 | £2,332 | 0.0 |
| 20 | Year26Q8 | 25.875 | £5,630 | £2,312 | 0.0 |
| 21 |          |        |        |        |     |
| 22 |          |        |        |        |     |
| 23 |          |        |        |        |     |
| 24 |          |        |        |        |     |
| 25 |          |        |        |        |     |
| 26 |          |        |        |        |     |
| 27 |          |        |        |        |     |
| 28 |          |        |        |        |     |
| 29 |          |        |        |        |     |
| 30 |          |        |        |        |     |
| 31 |          |        |        |        |     |
| 32 |          |        |        |        |     |
| 33 |          |        |        |        |     |
| 34 |          |        |        |        |     |
| 35 |          |        |        |        |     |
| 36 |          |        |        |        |     |
| 37 |          |        |        |        |     |
| 38 |          |        |        |        |     |
| 39 |          |        |        |        |     |
| 40 |          |        |        |        |     |
| 41 |          |        |        |        |     |
| 42 |          |        |        |        |     |
| 43 |          |        |        |        |     |
| 44 |          |        |        |        |     |
| 45 |          |        |        |        |     |
| 46 |          |        |        |        |     |
| 47 |          |        |        |        |     |
| 48 |          |        |        |        |     |
| 49 |          |        |        |        |     |
| 50 |          |        |        |        |     |
| 51 |          |        |        |        |     |
| 52 |          |        |        |        |     |
| 53 |          |        |        |        |     |
| 54 |          |        |        |        |     |
| 55 |          |        |        |        |     |
| 56 |          |        |        |        |     |
| 57 |          |        |        |        |     |
| 58 |          |        |        |        |     |
| 59 |          |        |        |        |     |
| 60 |          |        |        |        |     |

**Year Quarter**      **Cumulative cost surveillance**

|    |         |   |        |
|----|---------|---|--------|
| 29 | Year1Q1 | £ | 8,565  |
| 30 | Year1Q2 | £ | 8,565  |
| 31 | Year1Q3 | £ | 12,847 |
| 32 | Year1Q4 | £ | 12,847 |
| 33 | Year2Q1 | £ | 17,129 |
| 34 | Year2Q2 | £ | 17,129 |
| 35 | Year2Q3 | £ | 21,412 |
| 36 | Year2Q4 | £ | 21,412 |
| 37 | Year3Q1 | £ | 21,412 |
| 38 | Year3Q2 | £ | 21,412 |
| 39 | Year3Q3 | £ | 25,694 |
| 40 | Year3Q4 | £ | 25,694 |
| 41 | Year4Q1 | £ | 25,694 |
| 42 | Year4Q2 | £ | 25,694 |
| 43 | Year4Q3 | £ | 29,976 |
| 44 | Year4Q4 | £ | 29,976 |
| 45 | Year5Q1 | £ | 29,976 |
| 46 | Year5Q2 | £ | 29,976 |
| 47 | Year5Q3 | £ | 34,259 |
| 48 | Year5Q4 | £ | 34,259 |
| 49 | Year6Q1 | £ | 34,259 |
| 50 | Year6Q2 | £ | 34,259 |
| 51 | Year6Q3 | £ | 38,541 |
| 52 | Year6Q4 | £ | 38,541 |
| 53 | Year7Q1 | £ | 38,541 |
| 54 | Year7Q2 | £ | 38,541 |
| 55 | Year7Q3 | £ | 42,824 |

|    |          |   |        |
|----|----------|---|--------|
| 1  |          |   |        |
| 2  | Year7Q4  | £ | 42,824 |
| 3  | Year8Q1  | £ | 42,824 |
| 4  | Year8Q2  | £ | 42,824 |
| 5  | Year8Q3  | £ | 47,106 |
| 6  | Year8Q4  | £ | 47,106 |
| 7  | Year9Q1  | £ | 47,106 |
| 8  | Year9Q2  | £ | 47,106 |
| 9  | Year9Q3  | £ | 51,388 |
| 10 | Year9Q4  | £ | 51,388 |
| 11 | Year10Q1 | £ | 51,388 |
| 12 | Year10Q2 | £ | 51,388 |
| 13 | Year10Q3 | £ | 55,671 |
| 14 | Year10Q4 | £ | 55,671 |
| 15 | Year11Q1 | £ | 55,671 |
| 16 | Year11Q2 | £ | 55,671 |
| 17 | Year11Q3 | £ | 59,953 |
| 18 | Year11Q4 | £ | 59,953 |
| 19 | Year12Q1 | £ | 59,953 |
| 20 | Year12Q2 | £ | 59,953 |
| 21 | Year12Q3 | £ | 64,235 |
| 22 | Year12Q4 | £ | 64,235 |
| 23 | Year13Q1 | £ | 64,235 |
| 24 | Year13Q2 | £ | 64,235 |
| 25 | Year13Q3 | £ | 68,518 |
| 26 | Year13Q4 | £ | 68,518 |
| 27 | Year14Q1 | £ | 68,518 |
| 28 | Year14Q2 | £ | 68,518 |
| 29 | Year14Q3 | £ | 72,800 |
| 30 | Year14Q4 | £ | 72,800 |
| 31 | Year15Q1 | £ | 72,800 |
| 32 | Year15Q2 | £ | 72,800 |
| 33 | Year15Q3 | £ | 77,082 |
| 34 | Year15Q4 | £ | 77,082 |
| 35 | Year16Q1 | £ | 77,082 |
| 36 | Year16Q2 | £ | 77,082 |
| 37 | Year16Q3 | £ | 81,365 |
| 38 | Year16Q4 | £ | 81,365 |
| 39 | Year17Q1 | £ | 81,365 |
| 40 | Year17Q2 | £ | 81,365 |
| 41 | Year17Q3 | £ | 85,647 |
| 42 | Year17Q4 | £ | 85,647 |
| 43 | Year18Q1 | £ | 85,647 |
| 44 | Year18Q2 | £ | 85,647 |
| 45 | Year18Q3 | £ | 89,929 |
| 46 | Year18Q4 | £ | 89,929 |
| 47 | Year19Q1 | £ | 89,929 |
| 48 | Year19Q2 | £ | 89,929 |
| 49 | Year19Q3 | £ | 94,212 |
| 50 | Year19Q4 | £ | 94,212 |
| 51 | Year20Q1 | £ | 94,212 |
| 52 |          |   |        |
| 53 |          |   |        |
| 54 |          |   |        |
| 55 |          |   |        |
| 56 |          |   |        |
| 57 |          |   |        |
| 58 |          |   |        |
| 59 |          |   |        |
| 60 |          |   |        |

|    |          |   |         |
|----|----------|---|---------|
| 1  |          |   |         |
| 2  | Year20Q2 | £ | 94,212  |
| 3  | Year20Q3 | £ | 98,494  |
| 4  | Year20Q4 | £ | 98,494  |
| 5  | Year21Q1 | £ | 98,494  |
| 6  | Year21Q2 | £ | 98,494  |
| 7  | Year21Q3 | £ | 102,776 |
| 8  | Year21Q4 | £ | 102,776 |
| 9  | Year22Q1 | £ | 102,776 |
| 10 | Year22Q2 | £ | 102,776 |
| 11 | Year22Q3 | £ | 107,059 |
| 12 | Year22Q4 | £ | 107,059 |
| 13 | Year23Q1 | £ | 107,059 |
| 14 | Year23Q2 | £ | 107,059 |
| 15 | Year23Q3 | £ | 111,341 |
| 16 | Year23Q4 | £ | 111,341 |
| 17 | Year24Q1 | £ | 111,341 |
| 18 | Year24Q2 | £ | 111,341 |
| 19 | Year24Q3 | £ | 115,623 |
| 20 | Year24Q4 | £ | 115,623 |
| 21 | Year25Q1 | £ | 115,623 |
| 22 | Year25Q2 | £ | 115,623 |
| 23 | Year25Q3 | £ | 119,906 |
| 24 | Year25Q4 | £ | 119,906 |
| 25 |          |   |         |
| 26 |          |   |         |
| 27 |          |   |         |
| 28 |          |   |         |
| 29 |          |   |         |
| 30 |          |   |         |
| 31 |          |   |         |
| 32 |          |   |         |
| 33 |          |   |         |
| 34 |          |   |         |
| 35 |          |   |         |
| 36 |          |   |         |
| 37 |          |   |         |
| 38 |          |   |         |
| 39 |          |   |         |
| 40 |          |   |         |
| 41 |          |   |         |
| 42 |          |   |         |
| 43 |          |   |         |
| 44 |          |   |         |
| 45 |          |   |         |
| 46 |          |   |         |
| 47 |          |   |         |
| 48 |          |   |         |
| 49 |          |   |         |
| 50 |          |   |         |
| 51 |          |   |         |
| 52 |          |   |         |
| 53 |          |   |         |
| 54 |          |   |         |
| 55 |          |   |         |
| 56 |          |   |         |
| 57 |          |   |         |
| 58 |          |   |         |
| 59 |          |   |         |
| 60 |          |   |         |

1  
2  
3  
4  
5  
6  
7  
8  
9  
10  
11  
12  
13  
14  
15  
16  
17  
18  
19  
20  
21  
22  
23  
24  
25  
26  
27  
28  
29  
30  
31  
32  
33  
34  
35  
36  
37  
38  
39  
40  
41  
42  
43  
44  
45  
46  
47  
48  
49  
50  
51  
52  
53  
54  
55  
56  
57  
58  
59  
60

|                                                  |           |                     |
|--------------------------------------------------|-----------|---------------------|
| Quarterly cost surveillance cost per 1% SSI rate | £4,282    |                     |
| Total cost of disease per year                   | £2,251.95 |                     |
|                                                  | £22,520   |                     |
| Years until cost-saving                          | 3.375     | 999= more than 25 y |

| SSI rate reduction to 3% minimum (%) | Quarterly cost of surveillance | Quarterly costs of surveillance discounted | New total costs after reduction SSI | New total cost discounted | Prevented costs |
|--------------------------------------|--------------------------------|--------------------------------------------|-------------------------------------|---------------------------|-----------------|
| 10.0                                 | £4,282                         | £4,282                                     | £ 5,629.88                          | £ 5,629.88                | £ -             |
| 8.0                                  | £4,282                         | £4,264                                     | £ 4,503.90                          | £ 4,484.57                | £ 1,125.98      |
| 8.0                                  | £0                             | £0                                         | £ 4,503.90                          | £ 4,446.17                | £ 1,125.98      |
| 6.4                                  | £4,282                         | £4,191                                     | £ 3,603.12                          | £ 3,526.48                | £ 2,026.76      |
| 6.4                                  | £0                             | £0                                         | £ 3,603.12                          | £ 3,496.28                | £ 2,026.76      |
| 5.1                                  | £4,282                         | £4,120                                     | £ 2,882.50                          | £ 2,773.07                | £ 2,747.38      |
| 5.1                                  | £0                             | £0                                         | £ 2,882.50                          | £ 2,749.32                | £ 2,747.38      |
| 4.1                                  | £4,282                         | £4,050                                     | £ 2,306.00                          | £ 2,180.62                | £ 3,323.88      |
| 4.1                                  | £0                             | £0                                         | £ 2,306.00                          | £ 2,161.95                | £ 3,323.88      |
| 4.1                                  | £0                             | £0                                         | £ 2,306.00                          | £ 2,143.44                | £ 3,323.88      |
| 4.1                                  | £0                             | £0                                         | £ 2,306.00                          | £ 2,125.08                | £ 3,323.88      |
| 3.3                                  | £4,282                         | £3,913                                     | £ 1,844.80                          | £ 1,685.51                | £ 3,785.08      |
| 3.3                                  | £0                             | £0                                         | £ 1,844.80                          | £ 1,671.07                | £ 3,785.08      |
| 3.3                                  | £0                             | £0                                         | £ 1,844.80                          | £ 1,656.76                | £ 3,785.08      |
| 3.3                                  | £0                             | £0                                         | £ 1,844.80                          | £ 1,642.57                | £ 3,785.08      |
| 3.0                                  | £4,282                         | £3,780                                     | £ 1,688.96                          | £ 1,490.94                | £ 3,940.91      |
| 3.0                                  | £0                             | £0                                         | £ 1,688.96                          | £ 1,478.18                | £ 3,940.91      |
| 3.0                                  | £0                             | £0                                         | £ 1,688.96                          | £ 1,465.52                | £ 3,940.91      |
| 3.0                                  | £0                             | £0                                         | £ 1,688.96                          | £ 1,452.97                | £ 3,940.91      |
| 3.0                                  | £4,282                         | £3,652                                     | £ 1,688.96                          | £ 1,440.53                | £ 3,940.91      |
| 3.0                                  | £0                             | £0                                         | £ 1,688.96                          | £ 1,428.19                | £ 3,940.91      |
| 3.0                                  | £0                             | £0                                         | £ 1,688.96                          | £ 1,415.96                | £ 3,940.91      |
| 3.0                                  | £0                             | £0                                         | £ 1,688.96                          | £ 1,403.83                | £ 3,940.91      |
| 3.0                                  | £4,282                         | £3,529                                     | £ 1,688.96                          | £ 1,391.81                | £ 3,940.91      |
| 3.0                                  | £0                             | £0                                         | £ 1,688.96                          | £ 1,379.89                | £ 3,940.91      |
| 3.0                                  | £0                             | £0                                         | £ 1,688.96                          | £ 1,368.08                | £ 3,940.91      |
| 3.0                                  | £0                             | £0                                         | £ 1,688.96                          | £ 1,356.36                | £ 3,940.91      |
| 3.0                                  | £4,282                         | £3,410                                     | £ 1,688.96                          | £ 1,344.75                | £ 3,940.91      |
| 3.0                                  | £0                             | £0                                         | £ 1,688.96                          | £ 1,333.23                | £ 3,940.91      |
| 3.0                                  | £0                             | £0                                         | £ 1,688.96                          | £ 1,321.81                | £ 3,940.91      |
| 3.0                                  | £0                             | £0                                         | £ 1,688.96                          | £ 1,310.49                | £ 3,940.91      |
| 3.0                                  | £4,282                         | £3,294                                     | £ 1,688.96                          | £ 1,299.27                | £ 3,940.91      |
| 3.0                                  | £0                             | £0                                         | £ 1,688.96                          | £ 1,288.15                | £ 3,940.91      |
| 3.0                                  | £0                             | £0                                         | £ 1,688.96                          | £ 1,277.11                | £ 3,940.91      |
| 3.0                                  | £0                             | £0                                         | £ 1,688.96                          | £ 1,266.18                | £ 3,940.91      |
| 3.0                                  | £4,282                         | £3,183                                     | £ 1,688.96                          | £ 1,255.33                | £ 3,940.91      |

|    |     |        |        |   |          |   |          |   |          |
|----|-----|--------|--------|---|----------|---|----------|---|----------|
| 1  |     |        |        |   |          |   |          |   |          |
| 2  | 3.0 | £0     | £0     | £ | 1,688.96 | £ | 1,244.58 | £ | 3,940.91 |
| 3  | 3.0 | £0     | £0     | £ | 1,688.96 | £ | 1,233.93 | £ | 3,940.91 |
| 4  | 3.0 | £0     | £0     | £ | 1,688.96 | £ | 1,223.36 | £ | 3,940.91 |
| 5  | 3.0 | £4,282 | £3,075 | £ | 1,688.96 | £ | 1,212.88 | £ | 3,940.91 |
| 6  | 3.0 | £0     | £0     | £ | 1,688.96 | £ | 1,202.50 | £ | 3,940.91 |
| 7  | 3.0 | £0     | £0     | £ | 1,688.96 | £ | 1,192.20 | £ | 3,940.91 |
| 8  | 3.0 | £0     | £0     | £ | 1,688.96 | £ | 1,181.99 | £ | 3,940.91 |
| 9  | 3.0 | £0     | £0     | £ | 1,688.96 | £ | 1,171.87 | £ | 3,940.91 |
| 10 | 3.0 | £4,282 | £2,971 | £ | 1,688.96 | £ | 1,171.87 | £ | 3,940.91 |
| 11 | 3.0 | £0     | £0     | £ | 1,688.96 | £ | 1,161.83 | £ | 3,940.91 |
| 12 | 3.0 | £0     | £0     | £ | 1,688.96 | £ | 1,151.88 | £ | 3,940.91 |
| 13 | 3.0 | £0     | £0     | £ | 1,688.96 | £ | 1,151.88 | £ | 3,940.91 |
| 14 | 3.0 | £0     | £0     | £ | 1,688.96 | £ | 1,142.02 | £ | 3,940.91 |
| 15 | 3.0 | £4,282 | £2,871 | £ | 1,688.96 | £ | 1,132.24 | £ | 3,940.91 |
| 16 | 3.0 | £0     | £0     | £ | 1,688.96 | £ | 1,122.54 | £ | 3,940.91 |
| 17 | 3.0 | £0     | £0     | £ | 1,688.96 | £ | 1,112.93 | £ | 3,940.91 |
| 18 | 3.0 | £0     | £0     | £ | 1,688.96 | £ | 1,103.40 | £ | 3,940.91 |
| 19 | 3.0 | £0     | £0     | £ | 1,688.96 | £ | 1,103.40 | £ | 3,940.91 |
| 20 | 3.0 | £4,282 | £2,774 | £ | 1,688.96 | £ | 1,093.95 | £ | 3,940.91 |
| 21 | 3.0 | £0     | £0     | £ | 1,688.96 | £ | 1,084.58 | £ | 3,940.91 |
| 22 | 3.0 | £0     | £0     | £ | 1,688.96 | £ | 1,075.30 | £ | 3,940.91 |
| 23 | 3.0 | £0     | £0     | £ | 1,688.96 | £ | 1,075.30 | £ | 3,940.91 |
| 24 | 3.0 | £0     | £0     | £ | 1,688.96 | £ | 1,066.09 | £ | 3,940.91 |
| 25 | 3.0 | £4,282 | £2,680 | £ | 1,688.96 | £ | 1,056.96 | £ | 3,940.91 |
| 26 | 3.0 | £0     | £0     | £ | 1,688.96 | £ | 1,047.91 | £ | 3,940.91 |
| 27 | 3.0 | £0     | £0     | £ | 1,688.96 | £ | 1,047.91 | £ | 3,940.91 |
| 28 | 3.0 | £0     | £0     | £ | 1,688.96 | £ | 1,038.93 | £ | 3,940.91 |
| 29 | 3.0 | £0     | £0     | £ | 1,688.96 | £ | 1,038.93 | £ | 3,940.91 |
| 30 | 3.0 | £4,282 | £2,589 | £ | 1,688.96 | £ | 1,021.22 | £ | 3,940.91 |
| 31 | 3.0 | £0     | £0     | £ | 1,688.96 | £ | 1,012.47 | £ | 3,940.91 |
| 32 | 3.0 | £0     | £0     | £ | 1,688.96 | £ | 1,012.47 | £ | 3,940.91 |
| 33 | 3.0 | £0     | £0     | £ | 1,688.96 | £ | 1,003.80 | £ | 3,940.91 |
| 34 | 3.0 | £0     | £0     | £ | 1,688.96 | £ | 1,003.80 | £ | 3,940.91 |
| 35 | 3.0 | £4,282 | £2,502 | £ | 1,688.96 | £ | 995.20   | £ | 3,940.91 |
| 36 | 3.0 | £0     | £0     | £ | 1,688.96 | £ | 986.68   | £ | 3,940.91 |
| 37 | 3.0 | £0     | £0     | £ | 1,688.96 | £ | 978.23   | £ | 3,940.91 |
| 38 | 3.0 | £0     | £0     | £ | 1,688.96 | £ | 969.86   | £ | 3,940.91 |
| 39 | 3.0 | £0     | £0     | £ | 1,688.96 | £ | 961.55   | £ | 3,940.91 |
| 40 | 3.0 | £4,282 | £2,417 | £ | 1,688.96 | £ | 953.32   | £ | 3,940.91 |
| 41 | 3.0 | £0     | £0     | £ | 1,688.96 | £ | 945.15   | £ | 3,940.91 |
| 42 | 3.0 | £0     | £0     | £ | 1,688.96 | £ | 945.15   | £ | 3,940.91 |
| 43 | 3.0 | £0     | £0     | £ | 1,688.96 | £ | 937.06   | £ | 3,940.91 |
| 44 | 3.0 | £0     | £0     | £ | 1,688.96 | £ | 929.03   | £ | 3,940.91 |
| 45 | 3.0 | £4,282 | £2,335 | £ | 1,688.96 | £ | 921.08   | £ | 3,940.91 |
| 46 | 3.0 | £0     | £0     | £ | 1,688.96 | £ | 913.19   | £ | 3,940.91 |
| 47 | 3.0 | £0     | £0     | £ | 1,688.96 | £ | 913.19   | £ | 3,940.91 |
| 48 | 3.0 | £0     | £0     | £ | 1,688.96 | £ | 905.37   | £ | 3,940.91 |
| 49 | 3.0 | £0     | £0     | £ | 1,688.96 | £ | 905.37   | £ | 3,940.91 |
| 50 | 3.0 | £4,282 | £2,256 | £ | 1,688.96 | £ | 897.62   | £ | 3,940.91 |
| 51 | 3.0 | £0     | £0     | £ | 1,688.96 | £ | 889.93   | £ | 3,940.91 |
| 52 | 3.0 | £0     | £0     | £ | 1,688.96 | £ | 882.31   | £ | 3,940.91 |
| 53 | 3.0 | £0     | £0     | £ | 1,688.96 | £ | 882.31   | £ | 3,940.91 |
| 54 | 3.0 | £4,282 | £2,180 | £ | 1,688.96 | £ | 874.75   | £ | 3,940.91 |
| 55 | 3.0 | £0     | £0     | £ | 1,688.96 | £ | 874.75   | £ | 3,940.91 |
| 56 | 3.0 | £0     | £0     | £ | 1,688.96 | £ | 867.26   | £ | 3,940.91 |
| 57 | 3.0 | £0     | £0     | £ | 1,688.96 | £ | 867.26   | £ | 3,940.91 |
| 58 | 3.0 | £4,282 | £2,106 | £ | 1,688.96 | £ | 859.84   | £ | 3,940.91 |
| 59 | 3.0 | £0     | £0     | £ | 1,688.96 | £ | 852.47   | £ | 3,940.91 |
| 60 | 3.0 | £0     | £0     | £ | 1,688.96 | £ | 852.47   | £ | 3,940.91 |
| 61 | 3.0 | £0     | £0     | £ | 1,688.96 | £ | 845.17   | £ | 3,940.91 |
| 62 | 3.0 | £0     | £0     | £ | 1,688.96 | £ | 845.17   | £ | 3,940.91 |
| 63 | 3.0 | £0     | £0     | £ | 1,688.96 | £ | 837.94   | £ | 3,940.91 |
| 64 | 3.0 | £0     | £0     | £ | 1,688.96 | £ | 837.94   | £ | 3,940.91 |
| 65 | 3.0 | £4,282 | £2,106 | £ | 1,688.96 | £ | 830.76   | £ | 3,940.91 |
| 66 | 3.0 | £0     | £0     | £ | 1,688.96 | £ | 823.65   | £ | 3,940.91 |
| 67 | 3.0 | £0     | £0     | £ | 1,688.96 | £ | 823.65   | £ | 3,940.91 |
| 68 | 3.0 | £0     | £0     | £ | 1,688.96 | £ | 816.59   | £ | 3,940.91 |
| 69 | 3.0 | £0     | £0     | £ | 1,688.96 | £ | 816.59   | £ | 3,940.91 |



|    |     |        |        |   |          |   |        |   |          |
|----|-----|--------|--------|---|----------|---|--------|---|----------|
| 1  |     |        |        |   |          |   |        |   |          |
| 2  | 3.0 | £0     | £0     | £ | 1,688.96 | £ | 809.60 | £ | 3,940.91 |
| 3  | 3.0 | £4,282 | £2,035 | £ | 1,688.96 | £ | 802.67 | £ | 3,940.91 |
| 4  | 3.0 | £0     | £0     | £ | 1,688.96 | £ | 795.79 | £ | 3,940.91 |
| 5  | 3.0 | £0     | £0     | £ | 1,688.96 | £ | 788.98 | £ | 3,940.91 |
| 6  | 3.0 | £0     | £0     | £ | 1,688.96 | £ | 782.22 | £ | 3,940.91 |
| 7  | 3.0 | £0     | £0     | £ | 1,688.96 | £ | 775.52 | £ | 3,940.91 |
| 8  | 3.0 | £4,282 | £1,966 | £ | 1,688.96 | £ | 768.88 | £ | 3,940.91 |
| 9  | 3.0 | £0     | £0     | £ | 1,688.96 | £ | 762.30 | £ | 3,940.91 |
| 10 | 3.0 | £0     | £0     | £ | 1,688.96 | £ | 755.77 | £ | 3,940.91 |
| 11 | 3.0 | £0     | £0     | £ | 1,688.96 | £ | 749.30 | £ | 3,940.91 |
| 12 | 3.0 | £4,282 | £1,900 | £ | 1,688.96 | £ | 742.88 | £ | 3,940.91 |
| 13 | 3.0 | £0     | £0     | £ | 1,688.96 | £ | 736.52 | £ | 3,940.91 |
| 14 | 3.0 | £0     | £0     | £ | 1,688.96 | £ | 730.21 | £ | 3,940.91 |
| 15 | 3.0 | £0     | £0     | £ | 1,688.96 | £ | 723.96 | £ | 3,940.91 |
| 16 | 3.0 | £4,282 | £1,836 | £ | 1,688.96 | £ | 717.76 | £ | 3,940.91 |
| 17 | 3.0 | £0     | £0     | £ | 1,688.96 | £ | 711.61 | £ | 3,940.91 |
| 18 | 3.0 | £0     | £0     | £ | 1,688.96 | £ | 705.52 | £ | 3,940.91 |
| 19 | 3.0 | £0     | £0     | £ | 1,688.96 | £ | 699.48 | £ | 3,940.91 |
| 20 | 3.0 | £4,282 | £1,774 | £ | 1,688.96 | £ | 693.49 | £ | 3,940.91 |
| 21 | 3.0 | £0     | £0     | £ | 1,688.96 | £ |        |   |          |
| 22 | 3.0 | £0     | £0     | £ | 1,688.96 | £ |        |   |          |
| 23 | 3.0 | £0     | £0     | £ | 1,688.96 | £ |        |   |          |
| 24 | 3.0 | £0     | £0     | £ | 1,688.96 | £ |        |   |          |

|    | Cumulative cost<br>surveillance<br>discounted | Cumulative<br>prevented<br>cost | Cumulative<br>prevented cost<br>discounted | Net saving | Ratio | Year   |    |        |      |       |
|----|-----------------------------------------------|---------------------------------|--------------------------------------------|------------|-------|--------|----|--------|------|-------|
| 26 |                                               |                                 |                                            |            |       |        |    |        |      |       |
| 27 |                                               |                                 |                                            |            |       |        |    |        |      |       |
| 28 |                                               |                                 |                                            |            |       |        |    |        |      |       |
| 29 | £                                             | 8,546                           | £                                          | 1,126      | £     | 1,121  | £  | 7,425  | 7.62 | 1.125 |
| 30 | £                                             | 8,546                           | £                                          | 2,252      | £     | 2,233  | £  | 6,314  | 3.83 | 1.375 |
| 31 | £                                             | 12,738                          | £                                          | 4,279      | £     | 4,216  | £  | 8,521  | 3.02 | 1.625 |
| 32 | £                                             | 12,738                          | £                                          | 6,305      | £     | 6,183  | £  | 6,555  | 2.06 | 1.875 |
| 33 | £                                             | 16,857                          | £                                          | 9,053      | £     | 8,826  | £  | 8,031  | 1.91 | 2.125 |
| 34 | £                                             | 16,857                          | £                                          | 11,800     | £     | 11,447 | £  | 5,411  | 1.47 | 2.375 |
| 35 | £                                             | 20,907                          | £                                          | 15,124     | £     | 14,590 | £  | 6,317  | 1.43 | 2.625 |
| 36 | £                                             | 20,907                          | £                                          | 18,448     | £     | 17,706 | £  | 3,201  | 1.18 | 2.875 |
| 37 | £                                             | 20,907                          | £                                          | 21,772     | £     | 20,795 | £  | 111    | 1.01 | 3.125 |
| 38 | £                                             | 20,907                          | £                                          | 25,096     | £     | 23,859 | -£ | 2,952  | 0.88 | 3.375 |
| 39 | £                                             | 24,819                          | £                                          | 28,881     | £     | 27,317 | -£ | 2,497  | 0.91 | 3.625 |
| 40 | £                                             | 24,819                          | £                                          | 32,666     | £     | 30,745 | -£ | 5,926  | 0.81 | 3.875 |
| 41 | £                                             | 24,819                          | £                                          | 36,451     | £     | 34,145 | -£ | 9,325  | 0.73 | 4.125 |
| 42 | £                                             | 24,819                          | £                                          | 40,236     | £     | 37,515 | -£ | 12,695 | 0.66 | 4.375 |
| 43 | £                                             | 28,600                          | £                                          | 44,177     | £     | 40,994 | -£ | 12,394 | 0.70 | 4.625 |
| 44 | £                                             | 28,600                          | £                                          | 48,118     | £     | 44,443 | -£ | 15,843 | 0.64 | 4.875 |
| 45 | £                                             | 28,600                          | £                                          | 52,059     | £     | 47,862 | -£ | 19,263 | 0.60 | 5.125 |
| 46 | £                                             | 28,600                          | £                                          | 56,000     | £     | 51,253 | -£ | 22,653 | 0.56 | 5.375 |
| 47 | £                                             | 32,252                          | £                                          | 59,941     | £     | 54,614 | -£ | 22,362 | 0.59 | 5.625 |
| 48 | £                                             | 32,252                          | £                                          | 63,882     | £     | 57,946 | -£ | 25,694 | 0.56 | 5.875 |
| 49 | £                                             | 32,252                          | £                                          | 67,822     | £     | 61,250 | -£ | 28,998 | 0.53 | 6.125 |
| 50 | £                                             | 32,252                          | £                                          | 71,763     | £     | 64,526 | -£ | 32,274 | 0.50 | 6.375 |
| 51 | £                                             | 35,781                          | £                                          | 75,704     | £     | 67,773 | -£ | 31,992 | 0.53 | 6.625 |
| 52 | £                                             | 35,781                          | £                                          | 79,645     | £     | 70,993 | -£ | 35,212 | 0.50 | 6.875 |
| 53 | £                                             | 35,781                          | £                                          | 83,586     | £     | 74,185 | -£ | 38,404 | 0.48 | 7.125 |
| 54 | £                                             | 35,781                          | £                                          | 87,527     | £     | 77,350 | -£ | 41,569 | 0.46 | 7.375 |
| 55 | £                                             | 39,191                          | £                                          | 91,468     | £     | 80,488 | -£ | 41,297 | 0.49 | 7.625 |

|    |   |        |           |           |            |      |        |  |
|----|---|--------|-----------|-----------|------------|------|--------|--|
| 1  |   |        |           |           |            |      |        |  |
| 2  | £ | 39,191 | £ 95,409  | £ 83,599  | -£ 44,408  | 0.47 | 7.875  |  |
| 3  | £ | 39,191 | £ 99,350  | £ 86,683  | -£ 47,492  | 0.45 | 8.125  |  |
| 4  | £ | 39,191 | £ 103,291 | £ 89,741  | -£ 50,550  | 0.44 | 8.375  |  |
| 5  | £ | 42,485 | £ 107,232 | £ 92,772  | -£ 50,287  | 0.46 | 8.625  |  |
| 6  | £ | 42,485 | £ 111,172 | £ 95,778  | -£ 53,293  | 0.44 | 8.875  |  |
| 7  | £ | 42,485 | £ 115,113 | £ 98,758  | -£ 56,273  | 0.43 | 9.125  |  |
| 8  | £ | 42,485 | £ 119,054 | £ 101,712 | -£ 59,227  | 0.42 | 9.375  |  |
| 9  | £ | 45,668 | £ 122,995 | £ 104,642 | -£ 58,974  | 0.44 | 9.625  |  |
| 10 | £ | 45,668 | £ 126,936 | £ 107,546 | -£ 61,878  | 0.42 | 9.875  |  |
| 11 | £ | 45,668 | £ 130,877 | £ 110,425 | -£ 64,757  | 0.41 | 10.125 |  |
| 12 | £ | 45,668 | £ 134,818 | £ 113,279 | -£ 67,611  | 0.40 | 10.375 |  |
| 13 | £ | 48,743 | £ 138,759 | £ 116,109 | -£ 67,366  | 0.42 | 10.625 |  |
| 14 | £ | 48,743 | £ 142,700 | £ 118,915 | -£ 70,172  | 0.41 | 10.875 |  |
| 15 | £ | 48,743 | £ 146,641 | £ 121,697 | -£ 72,954  | 0.40 | 11.125 |  |
| 16 | £ | 48,743 | £ 150,582 | £ 124,455 | -£ 75,712  | 0.39 | 11.375 |  |
| 17 | £ | 51,714 | £ 154,523 | £ 127,189 | -£ 75,475  | 0.41 | 11.625 |  |
| 18 | £ | 51,714 | £ 158,463 | £ 129,900 | -£ 78,186  | 0.40 | 11.875 |  |
| 19 | £ | 51,714 | £ 162,404 | £ 132,588 | -£ 80,874  | 0.39 | 12.125 |  |
| 20 | £ | 51,714 | £ 166,345 | £ 135,253 | -£ 83,538  | 0.38 | 12.375 |  |
| 21 | £ | 54,585 | £ 170,286 | £ 137,895 | -£ 83,309  | 0.40 | 12.625 |  |
| 22 | £ | 54,585 | £ 174,227 | £ 140,514 | -£ 85,929  | 0.39 | 12.875 |  |
| 23 | £ | 54,585 | £ 178,168 | £ 143,111 | -£ 88,526  | 0.38 | 13.125 |  |
| 24 | £ | 54,585 | £ 182,109 | £ 145,685 | -£ 91,100  | 0.37 | 13.375 |  |
| 25 | £ | 57,359 | £ 186,050 | £ 148,238 | -£ 90,879  | 0.39 | 13.625 |  |
| 26 | £ | 57,359 | £ 189,991 | £ 150,769 | -£ 93,410  | 0.38 | 13.875 |  |
| 27 | £ | 57,359 | £ 193,932 | £ 153,278 | -£ 95,919  | 0.37 | 14.125 |  |
| 28 | £ | 57,359 | £ 197,873 | £ 155,765 | -£ 98,406  | 0.37 | 14.375 |  |
| 29 | £ | 60,039 | £ 201,813 | £ 158,231 | -£ 98,193  | 0.38 | 14.625 |  |
| 30 | £ | 60,039 | £ 205,754 | £ 160,676 | -£ 100,638 | 0.37 | 14.875 |  |
| 31 | £ | 60,039 | £ 209,695 | £ 163,101 | -£ 103,062 | 0.37 | 15.125 |  |
| 32 | £ | 60,039 | £ 213,636 | £ 165,504 | -£ 105,465 | 0.36 | 15.375 |  |
| 33 | £ | 62,628 | £ 217,577 | £ 167,887 | -£ 105,259 | 0.37 | 15.625 |  |
| 34 | £ | 62,628 | £ 221,518 | £ 170,249 | -£ 107,621 | 0.37 | 15.875 |  |
| 35 | £ | 62,628 | £ 225,459 | £ 172,592 | -£ 109,963 | 0.36 | 16.125 |  |
| 36 | £ | 62,628 | £ 229,400 | £ 174,914 | -£ 112,286 | 0.36 | 16.375 |  |
| 37 | £ | 65,130 | £ 233,341 | £ 177,216 | -£ 112,086 | 0.37 | 16.625 |  |
| 38 | £ | 65,130 | £ 237,282 | £ 179,498 | -£ 114,369 | 0.36 | 16.875 |  |
| 39 | £ | 65,130 | £ 241,223 | £ 181,761 | -£ 116,632 | 0.36 | 17.125 |  |
| 40 | £ | 65,130 | £ 245,163 | £ 184,005 | -£ 118,875 | 0.35 | 17.375 |  |
| 41 | £ | 67,547 | £ 249,104 | £ 186,229 | -£ 118,683 | 0.36 | 17.625 |  |
| 42 | £ | 67,547 | £ 253,045 | £ 188,435 | -£ 120,888 | 0.36 | 17.875 |  |
| 43 | £ | 67,547 | £ 256,986 | £ 190,621 | -£ 123,074 | 0.35 | 18.125 |  |
| 44 | £ | 67,547 | £ 260,927 | £ 192,789 | -£ 125,242 | 0.35 | 18.375 |  |
| 45 | £ | 69,882 | £ 264,868 | £ 194,938 | -£ 125,056 | 0.36 | 18.625 |  |
| 46 | £ | 69,882 | £ 268,809 | £ 197,069 | -£ 127,187 | 0.35 | 18.875 |  |
| 47 | £ | 69,882 | £ 272,750 | £ 199,182 | -£ 129,299 | 0.35 | 19.125 |  |
| 48 | £ | 69,882 | £ 276,691 | £ 201,276 | -£ 131,394 | 0.35 | 19.375 |  |
| 49 | £ | 72,139 | £ 280,632 | £ 203,352 | -£ 131,214 | 0.35 | 19.625 |  |
| 50 | £ | 72,139 | £ 284,573 | £ 205,411 | -£ 133,272 | 0.35 | 19.875 |  |
| 51 | £ | 72,139 | £ 288,514 | £ 207,452 | -£ 135,314 | 0.35 | 20.125 |  |

|    |   |        |   |         |   |         |    |         |      |        |
|----|---|--------|---|---------|---|---------|----|---------|------|--------|
| 1  |   |        |   |         |   |         |    |         |      |        |
| 2  | £ | 72,139 | £ | 292,454 | £ | 209,476 | -£ | 137,337 | 0.34 | 20.375 |
| 3  | £ | 74,319 | £ | 296,395 | £ | 211,482 | -£ | 137,163 | 0.35 | 20.625 |
| 4  | £ | 74,319 | £ | 300,336 | £ | 213,471 | -£ | 139,152 | 0.35 | 20.875 |
| 5  | £ | 74,319 | £ | 304,277 | £ | 215,443 | -£ | 141,125 | 0.34 | 21.125 |
| 6  | £ | 74,319 | £ | 308,218 | £ | 217,399 | -£ | 143,080 | 0.34 | 21.375 |
| 7  | £ | 76,425 | £ | 312,159 | £ | 219,337 | -£ | 142,912 | 0.35 | 21.625 |
| 8  | £ | 76,425 | £ | 316,100 | £ | 221,259 | -£ | 144,834 | 0.35 | 21.875 |
| 9  | £ | 76,425 | £ | 320,041 | £ | 223,164 | -£ | 146,739 | 0.34 | 22.125 |
| 10 | £ | 76,425 | £ | 323,982 | £ | 225,053 | -£ | 148,628 | 0.34 | 22.375 |
| 11 | £ | 78,460 | £ | 327,923 | £ | 226,926 | -£ | 148,466 | 0.35 | 22.625 |
| 12 | £ | 78,460 | £ | 331,864 | £ | 228,783 | -£ | 150,323 | 0.34 | 22.875 |
| 13 | £ | 78,460 | £ | 335,804 | £ | 230,624 | -£ | 152,164 | 0.34 | 23.125 |
| 14 | £ | 78,460 | £ | 339,745 | £ | 232,449 | -£ | 153,989 | 0.34 | 23.375 |
| 15 | £ | 80,427 | £ | 343,686 | £ | 234,259 | -£ | 153,832 | 0.34 | 23.625 |
| 16 | £ | 80,427 | £ | 347,627 | £ | 236,053 | -£ | 155,626 | 0.34 | 23.875 |
| 17 | £ | 80,427 | £ | 351,568 | £ | 237,831 | -£ | 157,405 | 0.34 | 24.125 |
| 18 | £ | 80,427 | £ | 355,509 | £ | 239,595 | -£ | 159,168 | 0.34 | 24.375 |
| 19 | £ | 82,327 | £ | 359,450 | £ | 241,343 | -£ | 159,017 | 0.34 | 24.625 |
| 20 | £ | 82,327 | £ | 363,391 | £ | 243,077 | -£ | 160,750 | 0.34 | 24.875 |
| 21 | £ | 82,327 | £ | 367,332 | £ | 244,795 | -£ | 162,469 | 0.34 | 25.125 |
| 22 | £ | 82,327 | £ | 371,273 | £ | 246,499 | -£ | 164,172 | 0.33 | 25.375 |
| 23 | £ | 84,162 | £ | 375,214 | £ | 248,188 | -£ | 164,026 | 0.34 | 25.625 |
| 24 | £ | 84,162 | £ | 379,155 | £ | 249,863 | -£ | 165,701 | 0.34 | 25.875 |
| 25 |   |        |   |         |   |         |    |         |      |        |
| 26 |   |        |   |         |   |         |    |         |      |        |
| 27 |   |        |   |         |   |         |    |         |      |        |
| 28 |   |        |   |         |   |         |    |         |      |        |
| 29 |   |        |   |         |   |         |    |         |      |        |
| 30 |   |        |   |         |   |         |    |         |      |        |
| 31 |   |        |   |         |   |         |    |         |      |        |
| 32 |   |        |   |         |   |         |    |         |      |        |
| 33 |   |        |   |         |   |         |    |         |      |        |
| 34 |   |        |   |         |   |         |    |         |      |        |
| 35 |   |        |   |         |   |         |    |         |      |        |
| 36 |   |        |   |         |   |         |    |         |      |        |
| 37 |   |        |   |         |   |         |    |         |      |        |
| 38 |   |        |   |         |   |         |    |         |      |        |
| 39 |   |        |   |         |   |         |    |         |      |        |
| 40 |   |        |   |         |   |         |    |         |      |        |
| 41 |   |        |   |         |   |         |    |         |      |        |
| 42 |   |        |   |         |   |         |    |         |      |        |
| 43 |   |        |   |         |   |         |    |         |      |        |
| 44 |   |        |   |         |   |         |    |         |      |        |
| 45 |   |        |   |         |   |         |    |         |      |        |
| 46 |   |        |   |         |   |         |    |         |      |        |
| 47 |   |        |   |         |   |         |    |         |      |        |
| 48 |   |        |   |         |   |         |    |         |      |        |
| 49 |   |        |   |         |   |         |    |         |      |        |
| 50 |   |        |   |         |   |         |    |         |      |        |
| 51 |   |        |   |         |   |         |    |         |      |        |
| 52 |   |        |   |         |   |         |    |         |      |        |
| 53 |   |        |   |         |   |         |    |         |      |        |
| 54 |   |        |   |         |   |         |    |         |      |        |
| 55 |   |        |   |         |   |         |    |         |      |        |
| 56 |   |        |   |         |   |         |    |         |      |        |
| 57 |   |        |   |         |   |         |    |         |      |        |
| 58 |   |        |   |         |   |         |    |         |      |        |
| 59 |   |        |   |         |   |         |    |         |      |        |
| 60 |   |        |   |         |   |         |    |         |      |        |

1  
2  
3  
4  
5  
6  
7  
8  
9  
10  
11 years  
12  
13  
14

15 **Prevented**  
16 **costs**  
17 **discounted**

|    |   |          |
|----|---|----------|
| 19 | £ | -        |
| 20 | £ | 1,121.14 |
| 21 | £ | 1,111.54 |
| 22 | £ | 1,983.64 |
| 23 | £ | 1,966.66 |
| 24 | £ | 2,643.08 |
| 25 | £ | 2,620.45 |
| 26 | £ | 3,143.16 |
| 27 | £ | 3,116.25 |
| 28 | £ | 3,089.56 |
| 29 | £ | 3,063.10 |
| 30 | £ | 3,458.25 |
| 31 | £ | 3,428.64 |
| 32 | £ | 3,399.27 |
| 33 | £ | 3,370.16 |
| 34 | £ | 3,478.87 |
| 35 | £ | 3,449.08 |
| 36 | £ | 3,419.54 |
| 37 | £ | 3,390.26 |
| 38 | £ | 3,361.23 |
| 39 | £ | 3,332.44 |
| 40 | £ | 3,303.90 |
| 41 | £ | 3,275.61 |
| 42 | £ | 3,247.56 |
| 43 | £ | 3,219.75 |
| 44 | £ | 3,192.18 |
| 45 | £ | 3,164.84 |
| 46 | £ | 3,137.74 |
| 47 | £ | 3,110.87 |
| 48 | £ | 3,084.23 |
| 49 | £ | 3,057.82 |
| 50 | £ | 3,031.63 |
| 51 | £ | 3,005.67 |
| 52 | £ | 2,979.93 |
| 53 | £ | 2,954.41 |
| 54 | £ | 2,929.11 |

|    |            |
|----|------------|
| 1  |            |
| 2  | £ 2,904.03 |
| 3  | £ 2,879.16 |
| 4  | £ 2,854.51 |
| 5  | £ 2,830.06 |
| 6  | £ 2,805.83 |
| 7  | £ 2,781.80 |
| 8  | £ 2,757.98 |
| 9  | £ 2,734.36 |
| 10 | £ 2,710.94 |
| 11 | £ 2,687.73 |
| 12 | £ 2,664.71 |
| 13 | £ 2,641.89 |
| 14 | £ 2,619.27 |
| 15 | £ 2,596.84 |
| 16 | £ 2,574.60 |
| 17 | £ 2,552.55 |
| 18 | £ 2,530.69 |
| 19 | £ 2,509.02 |
| 20 | £ 2,487.54 |
| 21 | £ 2,466.24 |
| 22 | £ 2,445.12 |
| 23 | £ 2,424.18 |
| 24 | £ 2,403.42 |
| 25 | £ 2,382.84 |
| 26 | £ 2,362.43 |
| 27 | £ 2,342.20 |
| 28 | £ 2,322.14 |
| 29 | £ 2,302.26 |
| 30 | £ 2,282.54 |
| 31 | £ 2,263.00 |
| 32 | £ 2,243.62 |
| 33 | £ 2,224.40 |
| 34 | £ 2,205.35 |
| 35 | £ 2,186.47 |
| 36 | £ 2,167.75 |
| 37 | £ 2,149.18 |
| 38 | £ 2,130.78 |
| 39 | £ 2,112.53 |
| 40 | £ 2,094.44 |
| 41 | £ 2,076.50 |
| 42 | £ 2,058.72 |
| 43 | £ 2,041.09 |
| 44 | £ 2,023.61 |
| 45 | £ 2,006.28 |
| 46 | £ 1,989.10 |
| 47 | £ 1,972.07 |
| 48 | £ 1,955.18 |
| 49 | £ 1,938.44 |
| 50 | £ 1,921.84 |
| 51 | £ 1,905.38 |

For peer review only

1  
2 £ 1,889.06  
3 £ 1,872.89  
4 £ 1,856.85  
5 £ 1,840.95  
6 £ 1,825.18  
7 £ 1,809.55  
8 £ 1,794.06  
9 £ 1,778.69  
10 £ 1,763.46  
11 £ 1,748.36  
12 £ 1,733.39  
13 £ 1,718.54  
14 £ 1,703.83  
15 £ 1,689.24  
16 £ 1,674.77  
17 £ 1,660.43  
18 £ 1,646.21  
19 £ 1,632.11  
20 £ 1,618.14

25  
26 **Year of cost**  
27 **saving**  
28

29 999  
30 999  
31 999  
32 999  
33 999  
34 999  
35 999  
36 999  
37 999  
38 999  
39 999  
40 3.375  
41 3.625  
42 3.875  
43 4.125  
44 4.375  
45 4.625  
46 4.875  
47 5.125  
48 5.375  
49 5.625  
50 5.875  
51 6.125  
52 6.375  
53 6.625  
54 6.875  
55 7.125  
56 7.375  
57 7.625  
58  
59  
60

|    |        |
|----|--------|
| 1  |        |
| 2  | 7.875  |
| 3  | 8.125  |
| 4  | 8.375  |
| 5  | 8.625  |
| 6  | 8.875  |
| 7  | 9.125  |
| 8  | 9.375  |
| 9  | 9.625  |
| 10 | 9.875  |
| 11 | 10.125 |
| 12 | 10.375 |
| 13 | 10.625 |
| 14 | 10.875 |
| 15 | 11.125 |
| 16 | 11.375 |
| 17 | 11.625 |
| 18 | 11.875 |
| 19 | 12.125 |
| 20 | 12.375 |
| 21 | 12.625 |
| 22 | 12.875 |
| 23 | 13.125 |
| 24 | 13.375 |
| 25 | 13.625 |
| 26 | 13.875 |
| 27 | 14.125 |
| 28 | 14.375 |
| 29 | 14.625 |
| 30 | 14.875 |
| 31 | 15.125 |
| 32 | 15.375 |
| 33 | 15.625 |
| 34 | 15.875 |
| 35 | 16.125 |
| 36 | 16.375 |
| 37 | 16.625 |
| 38 | 16.875 |
| 39 | 17.125 |
| 40 | 17.375 |
| 41 | 17.625 |
| 42 | 17.875 |
| 43 | 18.125 |
| 44 | 18.375 |
| 45 | 18.625 |
| 46 | 18.875 |
| 47 | 19.125 |
| 48 | 19.375 |
| 49 | 19.625 |
| 50 | 19.875 |
| 51 | 20.125 |
| 52 |        |
| 53 |        |
| 54 |        |
| 55 |        |
| 56 |        |
| 57 |        |
| 58 |        |
| 59 |        |
| 60 |        |

For peer review only

1  
2 20.375  
3 20.625  
4 20.875  
5 21.125  
6 21.375  
7 21.625  
8 21.875  
9 21.875  
10 22.125  
11 22.375  
12 22.625  
13 22.625  
14 22.875  
15 23.125  
16 23.375  
17 23.625  
18 23.875  
19 23.875  
20 24.125  
21 24.375  
22 24.625  
23 24.875  
24 24.875  
25 25.125  
26 25.375  
27 25.625  
28 25.875  
29  
30  
31  
32  
33  
34  
35  
36  
37  
38  
39  
40  
41  
42  
43  
44  
45  
46  
47  
48  
49  
50  
51  
52  
53  
54  
55  
56  
57  
58  
59  
60

For peer review only



# CHEERS Checklist

| Section/topic                                          | #   | Recommendation                                                                                                                                                                             | Reported on page # |
|--------------------------------------------------------|-----|--------------------------------------------------------------------------------------------------------------------------------------------------------------------------------------------|--------------------|
| <b>TITLE AND ABSTRACT</b>                              |     |                                                                                                                                                                                            |                    |
| Title                                                  | 1   | Identify the study as an economic evaluation or use more specific terms such as “cost-effectiveness analysis”, and describe the interventions compared.                                    | 1                  |
| Abstract                                               | 2   | Provide a structured summary of objectives, perspective, setting, methods (including study design and inputs), results (including base case and uncertainty analyses), and conclusions.    | 3 - 4              |
| <b>INTRODUCTION</b>                                    |     |                                                                                                                                                                                            |                    |
| Background and objectives                              | 3   | Provide an explicit statement of the broader context for the study.<br>Present the study question and its relevance for health policy or practice decisions.                               | 5 - 6              |
| <b>METHODS</b>                                         |     |                                                                                                                                                                                            |                    |
| Target population and subgroups                        | 4   | Describe characteristics of the base case population and subgroups analysed, including why they were chosen.                                                                               | 6-7                |
| Setting and location                                   | 5   | State relevant aspects of the system(s) in which the decision(s) need(s) to be made.                                                                                                       | 6-7                |
| Study perspective                                      | 6   | Describe the perspective of the study and relate this to the costs being evaluated.                                                                                                        | 9                  |
| Comparators                                            | 7   | Describe the interventions or strategies being compared and state why they were chosen.                                                                                                    | 10 - 11            |
| Time horizon                                           | 8   | State the time horizon(s) over which costs and consequences are being evaluated and say why appropriate.                                                                                   | 10                 |
| Discount rate                                          | 9   | Report the choice of discount rate(s) used for costs and outcomes and say why appropriate.                                                                                                 | 9                  |
| Choice of health outcomes                              | 10  | Describe what outcomes were used as the measure(s) of benefit in the evaluation and their relevance for the type of analysis performed.                                                    | 10                 |
| Measurement of effectiveness                           | 11a | <i>Single study-based estimates</i> : Describe fully the design features of the single effectiveness study and why the single study was a sufficient source of clinical effectiveness data |                    |
|                                                        | 11b | <i>Synthesis-based estimates</i> : Describe fully the methods used for identification of included studies and synthesis of clinical effectiveness data.                                    | 7 - 9              |
| Measurement and valuation of preference based outcomes | 12  | If applicable, describe the population and methods used to elicit preferences for outcomes                                                                                                 | NA                 |

# CHEERS Checklist

| Section/topic                        | #   | Checklist item                                                                                                                                                                                                                                                                                                                                        | Reported on page #        |
|--------------------------------------|-----|-------------------------------------------------------------------------------------------------------------------------------------------------------------------------------------------------------------------------------------------------------------------------------------------------------------------------------------------------------|---------------------------|
| Estimating resources and costs       | 13a | <i>Single study-based economic evaluation:</i> Describe approaches used to estimate resource use associated with the alternative interventions. Describe primary or secondary research methods for valuing each resource item in terms of its unit cost. Describe any adjustments made to approximate to opportunity costs.                           | NA                        |
|                                      | 13b | <i>Model-based economic evaluation:</i> Describe approaches and data sources used to estimate resource use associated with model health states. Describe primary or secondary research methods for valuing each resource item in terms of its unit cost. Describe any adjustments made to approximate to opportunity costs.                           | 7 - 9                     |
| Currency, price date, and conversion | 14  | Report the dates of the estimated resource quantities and unit costs. Describe methods for adjusting estimated unit costs to the year of reported costs if necessary. Describe methods for converting costs into a common currency base and the exchange rate.                                                                                        | 8 - 9                     |
| Choice of model                      | 15  | Describe and give reasons for the specific type of decision-analytical model used. Providing a figure to show model structure is strongly recommended.                                                                                                                                                                                                | 9 - 10                    |
| Assumptions                          | 16  | Describe all structural or other assumptions underpinning the decision-analytical model.                                                                                                                                                                                                                                                              | 10 - 11                   |
| Analytical models                    | 17  | Describe all analytical methods supporting the evaluation. This could include methods for dealing with skewed, missing, or censored data; extrapolation methods; methods for pooling data; approaches to validate or make adjustments (such as half cycle corrections) to a model; and methods for handling population heterogeneity and uncertainty. | 7-8, 9-10                 |
| <b>RESULTS</b>                       |     |                                                                                                                                                                                                                                                                                                                                                       |                           |
| Study parameters                     | 18  | Report the values, ranges, references, and, if used, probability distributions for all parameters/ Report reasons or sources for distributions used to represent uncertainty where appropriate. Providing a table to show the input values is strongly recommended.                                                                                   | 11 – 13<br>Tables 1, 2, 3 |
| Incremental costs and outcomes       | 19  | For each intervention, report mean values for the main categories of estimated costs and outcomes of interest, as well as mean differences between the comparator groups. If applicable, report incremental cost-effectiveness ratios.                                                                                                                | 13-15                     |
| Characterising uncertainty           | 20a | <i>Single study-based economic evaluation:</i> Describe the effects of sampling uncertainty for the estimated incremental cost and incremental effectiveness parameters, together with the impact of methodological assumptions (such as discount rate, study perspective).                                                                           | NA                        |
|                                      | 20b | <i>Model-based economic evaluation:</i> Describe the effects on the results of uncertainty for all input parameters, and uncertainty related to the structure of the model and assumptions.                                                                                                                                                           | 12                        |
| Characterising heterogeneity         | 21  | If applicable, report differences in costs, outcomes, or cost-effectiveness that can be explained by variations between subgroups of patients with different baseline characteristics or other observed variability in effects that are not reducible by more information.                                                                            | NA                        |
| Section/topic                        | #   | Checklist item                                                                                                                                                                                                                                                                                                                                        | Reported on page #        |
| <b>DISCUSSION</b>                    |     |                                                                                                                                                                                                                                                                                                                                                       |                           |

# CHEERS Checklist

1  
2  
3  
4  
5  
6  
7  
8  
9  
10  
11  
12  
13  
14  
15  
16  
17  
18  
19  
20  
21  
22  
23  
24  
25  
26  
27  
28  
29  
30  
31  
32  
33  
34  
35  
36  
37  
38  
39  
40  
41  
42  
43  
44  
45  
46  
47

|                                                                      |    |                                                                                                                                                                                                                                                   |       |
|----------------------------------------------------------------------|----|---------------------------------------------------------------------------------------------------------------------------------------------------------------------------------------------------------------------------------------------------|-------|
| Study findings, limitations, generalisability, and current knowledge | 22 | Summarise key study findings and describe how they support the conclusions reached. Discuss limitations and the generalisability of the findings and how the findings fit with current knowledge.                                                 | 15-21 |
| <b>Other</b>                                                         |    |                                                                                                                                                                                                                                                   |       |
| Source of funding                                                    | 23 | Describe how the study was funded and the role of the funder in the identification, design, conduct, and reporting of the analysis. Describe other non-monetary sources of support.                                                               | 22    |
| Conflicts of interest                                                | 24 | Describe any potential for conflict of interest of study contributors in accordance with journal policy. In the absence of a journal policy, we recommend authors comply with International Committee of Medical Journal Editors recommendations. | 22    |

For peer review only

# BMJ Open

## Cost-benefit analysis of surveillance for surgical site infection following caesarean section

|                                 |                                                                                                                                                                                                                                                                                                                                                                                                                                                                                                                                                                                                                                                                                             |
|---------------------------------|---------------------------------------------------------------------------------------------------------------------------------------------------------------------------------------------------------------------------------------------------------------------------------------------------------------------------------------------------------------------------------------------------------------------------------------------------------------------------------------------------------------------------------------------------------------------------------------------------------------------------------------------------------------------------------------------|
| Journal:                        | <i>BMJ Open</i>                                                                                                                                                                                                                                                                                                                                                                                                                                                                                                                                                                                                                                                                             |
| Manuscript ID                   | bmjopen-2020-036919.R1                                                                                                                                                                                                                                                                                                                                                                                                                                                                                                                                                                                                                                                                      |
| Article Type:                   | Original research                                                                                                                                                                                                                                                                                                                                                                                                                                                                                                                                                                                                                                                                           |
| Date Submitted by the Author:   | 19-Mar-2020                                                                                                                                                                                                                                                                                                                                                                                                                                                                                                                                                                                                                                                                                 |
| Complete List of Authors:       | Wloch, Catherine; Public Health England, Healthcare Associated Infection and Antimicrobial Resistance Division<br>Van Hoek, Albert Jan; London School of Hygiene and Tropical Medicine, Infectious Disease Epidemiology<br>Green, Nathan; Imperial College London, Department of Infectious Disease Epidemiology<br>Conneely, Joanna; Public Health England, Healthcare Associated Infections and Antimicrobial Resistance<br>Harrington, Pauline; Public Health England, HCAI & AMR<br>Sheridan, Elizabeth; Public Health England,<br>Wilson, Jennie; University of West London,<br>Lamagni, Theresa; Public Health England, Healthcare Associated Infections and Antimicrobial Resistance |
| <b>Primary Subject Heading</b>: | Health economics                                                                                                                                                                                                                                                                                                                                                                                                                                                                                                                                                                                                                                                                            |
| Secondary Subject Heading:      | Obstetrics and gynaecology                                                                                                                                                                                                                                                                                                                                                                                                                                                                                                                                                                                                                                                                  |
| Keywords:                       | HEALTH ECONOMICS, Maternal medicine < OBSTETRICS, Epidemiology < INFECTIOUS DISEASES                                                                                                                                                                                                                                                                                                                                                                                                                                                                                                                                                                                                        |
|                                 |                                                                                                                                                                                                                                                                                                                                                                                                                                                                                                                                                                                                                                                                                             |

SCHOLARONE™  
Manuscripts



I, the Submitting Author has the right to grant and does grant on behalf of all authors of the Work (as defined in the below author licence), an exclusive licence and/or a non-exclusive licence for contributions from authors who are: i) UK Crown employees; ii) where BMJ has agreed a CC-BY licence shall apply, and/or iii) in accordance with the terms applicable for US Federal Government officers or employees acting as part of their official duties; on a worldwide, perpetual, irrevocable, royalty-free basis to BMJ Publishing Group Ltd ("BMJ") its licensees and where the relevant Journal is co-owned by BMJ to the co-owners of the Journal, to publish the Work in this journal and any other BMJ products and to exploit all rights, as set out in our [licence](#).

The Submitting Author accepts and understands that any supply made under these terms is made by BMJ to the Submitting Author unless you are acting as an employee on behalf of your employer or a postgraduate student of an affiliated institution which is paying any applicable article publishing charge ("APC") for Open Access articles. Where the Submitting Author wishes to make the Work available on an Open Access basis (and intends to pay the relevant APC), the terms of reuse of such Open Access shall be governed by a Creative Commons licence – details of these licences and which [Creative Commons](#) licence will apply to this Work are set out in our licence referred to above.

Other than as permitted in any relevant BMJ Author's Self Archiving Policies, I confirm this Work has not been accepted for publication elsewhere, is not being considered for publication elsewhere and does not duplicate material already published. I confirm all authors consent to publication of this Work and authorise the granting of this licence.

1  
2  
3 **Cost-benefit analysis of surveillance for surgical site infection following**  
4 **caesarean section**  
5  
6

7  
8 Catherine Wloch, Albert Jan van Hoek, Nathan Green, Joanna Conneely, Pauline  
9 Harrington, Elizabeth Sheridan, Jennie Wilson, Theresa Lamagni  
10  
11  
12

13  
14  
15  
16 Healthcare-Associated Infection and Antimicrobial Resistance Division, National  
17 Infection Service, Public Health England, London NW9 5EQ, UK  
18  
19  
20

21 Catherine Wloch  
22

23 Senior Scientist,  
24

25 Joanna Conneely  
26

27 Operations Manager,  
28

29 Pauline Harrington  
30

31 Surveillance Manager,  
32

33 Elizabeth Sheridan  
34

35 Consultant Microbiologist,  
36

37 Theresa Lamagni  
38

39 Senior Epidemiologist  
40  
41  
42  
43  
44  
45  
46  
47  
48  
49  
50  
51

52 Immunisation, Hepatitis, and Blood Safety Department, National Infection Service,  
53 Public Health England, London NW9 5EQ, UK  
54  
55  
56

57 Albert Jan van Hoek  
58  
59  
60

1  
2  
3 Health Economist / Infectious disease modeller  
4  
5  
6  
7

8  
9 Department of Infectious Disease Epidemiology, School of Public Health, Faculty of  
10  
11 Medicine, Imperial College London, London W2 1PG, UK  
12

13  
14 Nathan Green

15  
16 Research Fellow  
17  
18  
19  
20  
21

22 University of West London, London W5 5RF, UK  
23  
24

25 Jennie Wilson,  
26  
27

28 Reader Healthcare Epidemiology  
29  
30  
31  
32

33 Correspondence to: [Catherine.wloch@phe.gov.uk](mailto:Catherine.wloch@phe.gov.uk)  
34  
35  
36  
37  
38  
39  
40  
41  
42  
43  
44  
45  
46  
47  
48  
49  
50  
51  
52  
53  
54  
55  
56  
57  
58  
59  
60

## ABSTRACT

**Objective** To estimate the economic burden to the health service of surgical site infection following caesarean section and to identify potential savings achievable through implementation of a surveillance programme.

**Design** Economic model to evaluate the costs and benefits of surveillance from community and hospital healthcare providers' perspective.

**Setting** England.

**Participants** Women undergoing caesarean section in National Health Service hospitals.

**Main outcome measure** Costs attributable to treatment and management of surgical site infection following caesarean section.

**Results** The costs (2010) for a hospital carrying out 800 caesarean sections a year based on infection risk of 9.6% were estimated at £18,914 (95% CI 11,521 to 29,499) with 28% accounted for by community care (£5,370). With inflation to 2017 prices, this equates to an estimated cost of £4.8m for all caesarean sections performed annually in England 2017-18, approximately £1,800 and £90 per infection managed in hospital and community respectively. The cost of surveillance for a hospital for one calendar quarter was estimated as £3,747 (2010 costs).

Modelling a decrease in risk of infection of 30, 20 or 10% between successive surveillance periods indicated that a variable intermittent surveillance strategy achieved higher or similar net savings than continuous surveillance. Breakeven was reached sooner with the variable surveillance strategy than continuous surveillance



1  
2  
3 when the baseline risk of infection was 10 or 15% and smaller losses with a baseline  
4 risk of 5%.  
5  
6  
7

8  
9 **Conclusion** Surveillance of surgical site infections after caesarean section with  
10 feedback of data to surgical teams offers a potentially effective means to reduce  
11 infection risk, improve patient experience and save money for the health service.  
12  
13  
14

### 15 16 17 **Strengths and limitations** 18

- 19  
20 • The model estimated both community (28%) and hospital costs (72%),  
21 providing a more representative estimate of overall economic burden to the  
22 health service.  
23  
24
- 25 • Time-matching of patients with and without infection according to length of  
26 post-operative stay provided a more accurate assessment of excess bed-days  
27 attributable to surgical site infection (2.6 days) than average excess length of  
28 stay (median difference 5 days) comparison by disentangling the impact of  
29 prolonged length of stay on increased chance of detecting an infection.  
30  
31
- 32 • Through capture and assessment of the costs and impact of surveillance, our  
33 model demonstrated the potential for savings through reductions in incidence  
34 of surgical site infections.  
35  
36
- 37 • Costs were obtained from NHS National Schedule Reference Costs and other  
38 sources rather than observed expenditure and assumptions made about the  
39 number of extra midwife and general practitioner appointments resulting from  
40 infection.  
41  
42
- 43 • The study was based on healthcare utilisation and did not assess direct and  
44 indirect costs borne by the patients or their carers.  
45  
46  
47  
48  
49  
50  
51  
52  
53  
54  
55  
56  
57  
58  
59  
60

## INTRODUCTION

Caesarean section delivery rates have risen in recent years in many Organisation for Economic Co-operation and Development (OECD) countries and ranged from 15.5% of deliveries in Finland to 53.1% in Turkey in 2015.<sup>1</sup> In England caesarean section rates have risen from 9% of deliveries in 1980 to 28.4% in 2017-18.<sup>2</sup>

Surgical site infection is a common and potentially serious complication of caesarean section with risk of infection of 9-11% reported previously in the UK.<sup>3,4</sup> The majority of post-caesarean surgical site infections are superficial infections of the skin and subcutaneous tissue which can be managed by the community midwife and general practitioner. However, in the UK, 10-13% are more serious deep infections of the muscle and fascial layer or organ/space infections (endometritis and reproductive tract infections)<sup>4-6</sup> which may require readmission to hospital. As well as causing anxiety and pain for the patient, these infections result in costs to the health service both in terms of excess length of hospital stay and for treatment of the infections in the community. In very rare instances, a surgical site infection following caesarean section can have fatal consequences.<sup>7</sup>

The use of surveillance to measure the risk of surgical site infection and feedback of results to surgeons has been shown to be effective in reducing the risk of infection.<sup>8-10</sup> However, surveillance of surgical site infection is resource-intensive and studies to assess its cost-benefit have not been conducted. The Surgical Site Infection Surveillance Service at Public Health England provides national coordination for surgical site infection surveillance for hospitals in England. In 2009 Public Health England conducted a multi-centre study of surgical site infection following caesarean section to test the feasibility of post-discharge detection methods and establish a

1  
2  
3 national benchmark for infection risk.<sup>6</sup> Based on the findings from the study, we  
4  
5 undertook a further assessment of the economic burden of infection and the potential  
6  
7 savings achievable through establishing surveillance as a means to stimulate a  
8  
9 review of clinical practices and direct infection prevention measures.  
10  
11  
12  
13  
14  
15

## 16 **METHODS**

17  
18  
19  
20 A cost-benefit model was constructed to estimate the costs to the health service of  
21  
22 managing surgical site infection post-caesarean section both in hospital and in the  
23  
24 community.  
25  
26

### 27 **Cohort study**

28  
29  
30 The estimated risk of infection was based on data captured during a multi-centre  
31  
32 cohort study which followed a protocol with standard case finding methods and  
33  
34 definitions of infection.<sup>6</sup> Of the 4107 women followed-up after caesarean section  
35  
36 across the 14 National Health Service centres participating in the 2009 study, 9.6%  
37  
38 (394) developed a surgical site infection meeting the study case definitions. Overall  
39  
40 11.2% (44) of infections were organ/space (endometritis and female genital tract  
41  
42 infections) or deep incisional infections and the remaining 88.3% were superficial  
43  
44 incisional infections. In the cohort study, surgical site infections were detected  
45  
46 during the initial inpatient hospital admission in which the caesarean section was  
47  
48 performed, at readmission to hospital, in the community by midwives visiting women  
49  
50 in their own home or via a patient questionnaire at 30 days after the operation.  
51  
52 According to the study protocol, if an infection was detected via more than one  
53  
54 method, a hierarchical approach was used to assign detection method such that if a  
55  
56 patient reported (community treated) infection was also identified by the community  
57  
58  
59  
60

midwife or other outpatient visit then the surgical site infection was reported as detection by midwife or other hospital healthcare professional respectively. Similarly, if the patient was readmitted, then detection was recorded as 'at readmission' rather than patient reported or detected by midwife/other healthcare professional.

Standard case definitions, based on clinical and laboratory findings, were used to identify surgical site infection that occurred up to 30 days after the operation.<sup>6 11</sup>

Table 1 shows the parameters taken from the cohort study for use in the model.

**Table 1. Parameters for surgical site infection (SSI) risk used in the model**

| Detection method                               | Infection risk |
|------------------------------------------------|----------------|
| All methods combined                           | 9.59%          |
| Inpatient detected                             | 0.51%          |
| Inpatient detected SSI subsequently readmitted | 0.05%          |
| Readmission detected                           | 0.56%          |
| Community Midwife detected                     | 5.31%          |
| Self-reported by patient                       | 3.21%          |

Seven of the participating hospitals repeated the surveillance for a further three-month period and the risk of infection were compared between these two periods. The seven hospitals who repeated the surveillance for a second period carried out a total of 1212 operations with 131 infections in the first period (10.8% risk) and 1235 operations with 89 infections (7.2% risk) in the second period. A slight but non-significant increase in infection risk was observed for two of the seven hospitals, whereas five hospitals experienced a decrease in infection risk, three of which were significant (Figure 1). The mean reduction in infection risk between the 2 periods across all hospitals was -31.2% (range from -73.3 to 19.5%).

### Hospital treatment costs

1  
2  
3 Costs were modelled on a hospital undertaking a three-month period of surveillance  
4 and conducting 800 caesarean sections per year (the approximate average number  
5 of operations for hospitals participating in the multi-centre study).  
6  
7  
8

9  
10  
11 The length of the initial hospital stay during which the caesarean section was  
12 performed was derived from data captured during the study. Rather than a simple  
13 comparison of length of stay for women with and without a surgical site infection, a  
14 case-control paired matching approach was used to estimate excess length of stay  
15 for patients with an infection diagnosed during the inpatient stay. All controls must  
16 have had a post-operative length of stay at least as long as the infection free period  
17 of stay of the paired case. The total post-operative length of stay of a patient with  
18 surgical site infection (case) and total length of stay of matched patients without  
19 infection (controls) was compared. The mean average of paired differences between  
20 cases and controls was calculated. Under the assumption that the exposure to  
21 infection is from the time of surgery onwards, then the time in hospital before  
22 caesarean section is assumed not to put the patients at additional risk of surgical site  
23 infection. As well as matching controls to the infection free period of the case, we  
24 selected controls by identifying patients matched on confounders to account for  
25 varying length of stay (age, antimicrobial prophylaxis, American Society of  
26 Anesthesiologists physical status score, body mass index category, blood loss,  
27 diabetes, duration of active labour, duration of operation, urgency of risk category,  
28 and wound class).  
29  
30  
31  
32  
33  
34  
35  
36  
37  
38  
39  
40  
41  
42  
43  
44  
45  
46  
47  
48  
49  
50  
51

52  
53 Case records of patients identified from the cohort study as having been readmitted  
54 for a surgical site infection were linked to National Health Service (NHS) Digital  
55 Hospital Episode Statistics© (HES) Admitted Patient Care Records to derive  
56  
57  
58  
59  
60

1  
2  
3 information on length of readmission stay and diagnostic reason for readmission.

4  
5 This enabled additional costs due to readmission to be calculated for: a) the patients  
6  
7 from the cohort study who had an infection detected during the inpatient period who  
8  
9 were also readmitted to hospital for further treatment and b) the patients from the  
10  
11 cohort study whose infection was initially diagnosed at readmission.  
12  
13

14  
15 The average cost of excess bed days and readmissions was identified from codes in  
16  
17 Healthcare Resource Group data (standard groupings of clinically similar treatments  
18  
19 which use common levels of healthcare resource listed within HES data) assigned to  
20  
21 each patient hospital spell and linked to the National Schedule Reference Costs (the  
22  
23 average unit cost to the NHS of providing a defined service, 2010).<sup>12</sup>  
24  
25

### 26 27 28 **Community treatment costs**

29  
30 Community costs of treating and managing surgical site infection were estimated  
31  
32 based on the assumption of one extra midwife visit, one general practitioner visit and  
33  
34 one course of antibiotics for each surgical site infection detected by a midwife. For  
35  
36 patient reported infections this was assumed to be one general practitioner visit and  
37  
38 one course of antibiotics. The cost of a community midwife post-natal visit was  
39  
40 identified from National Schedule Reference Costs and a general practitioner visit  
41  
42 from Unit Costs of Health and Social Care (Personal Social Services Research Unit).  
43  
44 Antibiotic costs were obtained from the NHS Drugs Tariff.<sup>13</sup>  
45  
46  
47  
48

49  
50 The proportion of patients in the study with community reported surgical site infection  
51  
52 accompanied by positive microbiology results was employed to derive model  
53  
54 parameters for microbiological testing. Positive microbiology results were recorded  
55  
56 for 43% of the community midwife detected surgical site infections and 30% of  
57  
58  
59  
60

1  
2  
3 patient reported infections in the cohort study. Microbiology costs were obtained by  
4  
5 personal communication with consultant microbiologists from two NHS Trusts.  
6  
7

### 8 9 **Hospital surveillance costs**

10 Information on the staff time required to conduct a three-month period of surveillance  
11 and administer patient questionnaires was provided by three hospitals who  
12  
13 participated in the multi-centre study. Expenses for other resources (stationery,  
14  
15 telephone calls, stamps) needed to carry out surveillance were also recorded. This  
16  
17 information was used to determine the average cost of surveillance (including gross  
18  
19 salary costs) for a hospital conducting 800 caesarean sections per year.  
20  
21  
22  
23  
24  
25

### 26 **Cost-benefit analysis**

27  
28 The uncertainty around the overall costs was calculated using the appropriate  
29  
30 binomial distributions based on the sample in the study and a normal distribution for  
31  
32 the length of stay. The 95% confidence interval was obtained by running 10,000  
33  
34 simulations in @Risk 5.0 (risk analysis software) using Excel 2007.  
35  
36  
37

38 The cost-benefit model compared the total 2017 costs to the healthcare system of a  
39  
40 scenario with and without surveillance in place (healthcare provider's perspective).  
41

42 The costs identified for surgical site infection following caesarean section were used  
43  
44 to model the balance of surveillance costs versus savings over a five year period  
45  
46 (with discounting of costs at 3.5% to reflect value over the time of the analysis)<sup>14</sup>  
47  
48 using Microsoft Excel. Different surveillance strategies were modelled, together with  
49  
50 three baseline infection risks and three potential average reductions in risk of  
51  
52 infection between each surveillance period.  
53  
54  
55

56  
57 The three average rates of reduction in infection risk were selected for the model  
58  
59 given the reductions in caesarean section surgical site infection achieved during our  
60

1  
2  
3 cohort study (31%), also seen in other European single site studies (70-80%  
4  
5 between interventions)<sup>15,16</sup> and observed across European surveillance networks  
6  
7 (e.g. approximately 33% over 4 years for United Kingdom, except England).<sup>17</sup>  
8  
9

10  
11 A range of scenarios were tested as follows:  
12  
13

- 14 A. baseline infection risk of 5, 10 or 15%  
15  
16 B. surveillance strategies of  
17  
18 a. one 3-month surveillance quarter a year  
19  
20 b. two 3-month surveillance quarters a year  
21  
22 c. continuous surveillance (in 3-month periods)  
23  
24 C. average reductions of 10, 20 or 30% in infection risk during each surveillance  
25  
26 period.  
27  
28  
29  
30

31 When calculating reductions in surgical site infection risk, the model reflected a  
32  
33 constant reduction rate over the five year period of study whereby the risk for each  
34  
35 surveillance period was iteratively calculated from the surgical site infection risk of  
36  
37 the previous surveillance period. A fourth surveillance strategy with a variable  
38  
39 programme was also modelled: continuous surveillance for hospitals with a surgical  
40  
41 site infection risk over 10%, 2 surveillance quarters a year for surgical site infection  
42  
43 risk between 5 and 10% and one surveillance period a year for surgical site infection  
44  
45 risk <5%.  
46  
47  
48  
49

50 The simulations assumed that average reductions in risk of disease were achieved  
51  
52 through infection control measures taken during each surveillance period and  
53  
54 sustained between surveillance periods. The calculations also assumed an  
55  
56 irreducible minimum infection risk of 3% could be reached at which point no further  
57  
58  
59  
60



1  
2  
3 reductions in risk of infection would be included in the model and surveillance would  
4  
5 be reduced to one quarter per year.  
6  
7

### 8 **Patient and Public Involvement**

9  
10 Patients or the public were not involved in the design, conduct, reporting or  
11  
12 dissemination of our research.  
13  
14  
15

## 16 **RESULTS**

### 17 **Treatment costs**

18  
19 The estimated 2010 costs to hospital and community of surgical site infection  
20  
21 following caesarean section at a model hospital conducting 800 caesarean sections  
22  
23 per year are shown in Table 2. For the initial hospital stay (during which the  
24  
25 caesarean section was performed) the difference in median length of stay for the 21  
26  
27 patients with an infection detected during that inpatient stay, compared to those  
28  
29 without an infection, was five days. Using an alternative case-control paired  
30  
31 matching approach to account for time at risk and differences in factors other than  
32  
33 the surgical site infection which may have increased length of stay (such as patient  
34  
35 comorbidity), the number of excess days due to surgical site infection detected  
36  
37 during the initial inpatient stay was calculated as 2.60 days (standard error 0.082).  
38  
39

40  
41 Costs associated with a) 2 patients subsequently readmitted to hospital for further  
42  
43 treatment of infections detected during the initial inpatient stay and b) for  
44  
45 readmission of 23 patients for surgical site infection, were derived from Healthcare  
46  
47 Resource Group data. The most commonly identified codes associated with the  
48  
49 readmission spell for infection of the patients in the cohort study were: 'NZ05  
50  
51  
52  
53  
54  
55  
56  
57  
58  
59  
60

1  
2  
3 Antenatal and Post-natal investigation (0 days)', 'NZ08 Antenatal and Post-natal  
4 investigation (1 day or more)'. The cost to community healthcare of microbiological  
5 testing was estimated from the mean microbiology cost of £13.74 reported by the  
6 two NHS hospitals (including pay and consumables), together with the proportions of  
7 positive microbiology results recorded in the cohort study for community midwife  
8 detected and patient reported infections.  
9

10  
11  
12 The estimated hospital costs resulting from a 9.6% infection risk at a model hospital  
13 conducting 800 caesarean sections a year were estimated to be £13,544 with  
14 community costs estimated at £5,370, an overall cost of £18,914. Uncertainty  
15 calculations (95% confidence interval) indicated a minimum of £11,521 and  
16 maximum £29,499 with the most influential parameters being infections detected on  
17 readmission, inpatient detected infections and incidence of readmission of the  
18 patients whose surgical site infection were already detected as inpatients. The two  
19 main drivers of the uncertainty in the overall outcome were the incidence of  
20 readmission and the uncertainty around the excess length of stay.  
21  
22

23  
24  
25 Costs were inflated to 2017 prices (Table 2) using the OECD Consumer Prices Index  
26 for the United Kingdom (Total less food, less energy).<sup>18</sup> This resulted in hospital  
27 costs of £15,481, Community costs of £6,138 and total cost of £21,619. If the 9.6%  
28 infection risk identified in our cohort study was applied to the 177,793 caesarean  
29 sections performed annually in England (2017-18) this would be equivalent to 17,059  
30 infections resulting in an estimated cost of £4.8 million. The approximate cost per  
31 infection treated in hospital during inpatient or readmission stay was £1800 and was  
32 £90 for infections managed in the community by community midwives or general  
33 practitioners after discharge.  
34  
35  
36  
37  
38  
39  
40  
41  
42  
43  
44  
45  
46  
47  
48  
49  
50  
51  
52  
53  
54  
55  
56  
57  
58  
59  
60

### Surveillance costs

Information provided by participating hospitals indicated that a surveillance nurse would require time equivalent to two days a week for surveillance of 200 patients undergoing caesarean section for one quarter. The estimated cost for one quarter of surveillance at the model hospital carrying out 800 caesarean sections a year was calculated at £3,747 including administrative costs (2010 prices) and £4,282 when inflated to 2017 costs (Table 3).

For peer review only

**Table 2.** Estimated annual hospital and community costs to the NHS arising due to surgical site infection following caesarean section for a model hospital conducting 800 caesarean sections per year

| Treatment stage                                  | Item                                    | Estimate  | (95% CI)*      | Hospital costs (£) | Community costs (£) | Total costs (£) | (95% CI)*                   | †Inflated costs  |
|--------------------------------------------------|-----------------------------------------|-----------|----------------|--------------------|---------------------|-----------------|-----------------------------|------------------|
| <b>Infections detected during inpatient stay</b> | a Excess length of stay (days)**        | 2.6       | (2.44 to 2.76) |                    |                     |                 |                             |                  |
|                                                  | b Value per bed day                     | £444.00   |                |                    |                     |                 |                             |                  |
|                                                  | c No. cases (0.51% of 800 women)        | 4.1       | (2.3 to 5.8)   |                    |                     |                 |                             |                  |
|                                                  | <b>Total = (a*b*c)</b>                  |           |                | <b>£4,722.82</b>   |                     |                 |                             | <b>£5,398.25</b> |
| Inpatient detected SSI subsequently readmitted   | a Average HRG cost per spell            | £1,092.20 |                |                    |                     |                 |                             |                  |
|                                                  | b Spells per patient                    | 1         |                |                    |                     |                 |                             |                  |
|                                                  | c No. cases (0.05% of 800 women)        | 0.4       | (0 to 1)       |                    |                     |                 |                             |                  |
|                                                  | <b>Total = (a*b*c)</b>                  |           |                | <b>£428.14</b>     |                     |                 |                             | <b>£489.37</b>   |
| <b>Infections detected at readmission</b>        | a Average HRG cost per spell            | £1,387.67 |                |                    |                     |                 |                             |                  |
|                                                  | b Spells per patient                    | 1.35      |                |                    |                     |                 |                             |                  |
|                                                  | c No. cases (0.56% of 800 women)        | 4.5       | (2.7 to 6.2)   |                    |                     |                 |                             |                  |
|                                                  | <b>Total = (a*b*c)</b>                  |           |                | <b>£8,392.63</b>   |                     |                 |                             | <b>£9,592.90</b> |
| <b>Infections detected by community midwife</b>  | a 1 extra midwife visit                 | £63.00    |                |                    |                     |                 |                             |                  |
|                                                  | b 1 extra visit to GP                   | £30.00    |                |                    |                     |                 |                             |                  |
|                                                  | c 1 course antibiotics                  | £4.27     |                |                    |                     |                 |                             |                  |
|                                                  | d Microbiology (£13.74)*43%             | £5.91     |                |                    |                     |                 |                             |                  |
|                                                  | e No. cases (5.31% of 800 women)        | 42.4      | (37.0 to 47.8) |                    |                     |                 |                             |                  |
|                                                  | <b>Total (a+b+c+d)*e</b>                |           |                |                    | <b>£4,383.01</b>    |                 |                             | <b>£5,009.84</b> |
| <b>Self reported infections</b>                  | a 1 extra visit to general practitioner | £30.00    |                |                    |                     |                 |                             |                  |
|                                                  | b 1 course antibiotics (£4.27)          | £4.27     |                |                    |                     |                 |                             |                  |
|                                                  | c Microbiology (£13.74)*30%             | £4.12     |                |                    |                     |                 |                             |                  |
|                                                  | d No. cases (3.21% of 800 women)        | 25.7      | (21.4 to 30.0) |                    |                     |                 |                             |                  |
|                                                  | <b>Total = (a+b+c)*d</b>                |           |                |                    | <b>£987.14</b>      |                 |                             | <b>£1,128.32</b> |
| <b>Total costs</b>                               |                                         |           |                | <b>£13,544</b>     | <b>£5,370</b>       | <b>£18,914</b>  | <b>(£11,521 to £29,499)</b> | <b>£21,619</b>   |

\*CI=Confidence Interval. \*\*Normal distribution assumed. †Inflated to 2017 prices using UK Consumer Price Index – Total less food, less energy (OECD Data)  
 HRG=Healthcare Resource Group, SSI=Surgical site infection

**Table 3.** Estimated costs for a 3-month surveillance period for surgical site infection following caesarean section for a model hospital conducting 800 caesarean sections per year

| Surveillance       | Item | Surveillance                                            | Total            | Inflated costs†  |
|--------------------|------|---------------------------------------------------------|------------------|------------------|
| Surveillance nurse | a    | 0.4 equivalent Band 6 Surveillance nurse (24% on costs) | £14,614          |                  |
|                    | b    | 1 surveillance quarter                                  | 0.25             |                  |
|                    |      | Total (a*b)                                             |                  | £3,653.54        |
| Administration     | a    | Stationery/photocopying/stamps/phone calls              | £0.47            |                  |
|                    | b    | Patients in surveillance quarter                        | 200              |                  |
|                    |      | Total (a*b)                                             |                  | £93.00           |
| <b>Total cost</b>  |      |                                                         | <b>£3,746.54</b> | <b>£4,282.35</b> |

†Inflated to 2017 prices using UK Consumer Price Index – Total less food, less energy (OECD Data)

### Modelling cost savings from surveillance

As might be expected, the model simulations estimating the balance of surveillance expenditure versus savings covering a period of 5 years indicated that surgical site infection risk reduced more quickly for the continuous surveillance strategy than for either one or two quarters a year surveillance where the same baseline infection risk and reductions in risk of infection were applied (Figures 2-4).

Where the hospital baseline infection risk was 10%, similar to the mean surgical site infection risk in the cohort study, savings over the period of simulation were greater than the costs of surveillance for all the surveillance strategies where reductions of 20 or 30% in the risk of infection were achieved. Breakeven was achieved by the end of Year 2 (or sooner) where reductions of 30% between successive surveillance periods were applied and by the end of Year 3 (or sooner) for reductions of 20% (Figure 3). Net savings of £25,035 over the five year period were achieved for a strategy of continuous surveillance with a 20% reduction in infection risk. The simulation for a hospital with a baseline infection risk of 5% indicated that savings from reducing surgical site infection risk did not offset the costs of surveillance for any of the surveillance strategies.

For a hospital with a baseline surgical site infection risk of 15%, all of the surveillance strategies achieved savings greater than the costs of surveillance over the 5 year period of the simulation when reductions in infection risk of 10, 20 or 30% were applied. Breakeven was achieved by the end of Year 2 (or sooner) where reductions of 20% and 30% at each surveillance period were applied (Figure 4). A saving of £60,872 over the period of simulation was obtained for a 15% baseline

1  
2  
3 infection risk achieving a 20% reduction in infections at each surveillance period and  
4  
5 employing a continuous surveillance strategy.  
6  
7

8  
9 When the variable surveillance strategy was modelled (Figure 5) this responsive  
10  
11 strategy estimated a net saving of £60,902 would be achieved for a hospital with a  
12  
13 15% baseline infection risk achieving a 20% reduction in infections at each  
14  
15 surveillance period (£25,694 savings for 10% infection risk with 20% reductions).  
16

17  
18 For hospitals with a 15% baseline infection risk, breakeven points for the variable  
19  
20 surveillance strategy were slightly later compared to the fixed surveillance strategies  
21  
22 of one or two surveillance periods a year, due to the continuous surveillance  
23  
24 component of the variable strategy. However, for a 10% baseline infection risk,  
25  
26 breakeven was earlier or at the same time for the variable surveillance strategy  
27  
28 compared to the original fixed surveillance strategies.  
29  
30

31  
32  
33 Overall breakeven was reached within the 5 year simulation period with the variable  
34  
35 surveillance strategy for scenarios where hospitals had a baseline infection risk of 10  
36  
37 or 15% (Figures 6-8). The variable surveillance strategy achieved higher (5/9  
38  
39 scenarios) or similar net savings (1/9 scenarios) compared to the original  
40  
41 surveillance strategies for the equivalent baseline infection risk and reductions in risk  
42  
43 of infection. The variable surveillance strategy for hospitals with a 5% baseline risk  
44  
45 of infection was equivalent to the one surveillance period a year strategy and  
46  
47 therefore resulted in equal losses (3/9 scenarios).  
48  
49  
50

51  
52 A tool has been designed, based on the costs identified in this study for caesarean  
53  
54 section, to predict the time to breakeven for a model hospital employing the variable  
55  
56 surveillance strategy and applying self-selecting baseline infection risk, predicted  
57  
58 reductions in infection and volume of surgery (supplementary material).  
59  
60

## DISCUSSION

Our study estimated that surgical site infections in caesarean section cost the National Health Service in England £4.8 million a year, equating to £21,619 for a typical hospital conducting 800 caesarean sections per year. Through capture and assessment of the costs of surveillance, our model showed that the benefits of a surveillance strategy can outweigh the costs through reductions in incidence of surgical site infections.

Excess length of stay of patients with infection compared to patients without is frequently used as a proxy for combined inpatient attributable costs. As median length of stay for caesarean section patients was 3 days at the time of the study, and median time to infection was 10 days, the majority of surgical site infections would have occurred after discharge. However, if a woman remains in hospital for reasons other than surgical site infection there is a chance she might develop a surgical site infection which would otherwise have been detected and managed in the community by her midwife or general practitioner. Therefore, a naïve comparison of length of stay between patients with and without a surgical site infection would have produced an overestimate because it would not disentangle the increased chance of detecting an infection for those patients with a prolonged length of stay due to other reasons.<sup>19</sup>

<sup>20</sup> A suitable calculation method should account for patient heterogeneity and timing of events to avoid biasing results. A multistate model estimate which accounted for the time-dependent bias was considered, however this did not naturally incorporate patient heterogeneity. An alternative option was to use a confounder and time matching approach, where suitable control patients should be "at risk" of acquiring an infection at the time of infection of the corresponding case, which can be satisfied



1  
2  
3 by using the time-to-infection as an additional matching criteria. The advantage of  
4 the method used in this study, of matching infected patients with similar uninfected  
5 patients with comparable length of post-operative stay prior to infection, is that it  
6 produced a more accurate assessment of the excess length of stay directly  
7 attributable to the surgical site infection (2.6 days) than the average excess length of  
8 stay (median 5 days).  
9

10  
11  
12 The largest contribution to the overall costs (and the uncertainty) for the model  
13 hospital is the excess post-delivery length of stay and the readmission of patients.  
14 This equates to approximately £1,800 per infection detected during the inpatient stay  
15 or leading to readmission. There are few studies describing costs for surgical site  
16 infection following caesarean section and comparisons are hampered by differences  
17 in methodology.<sup>21 22</sup> The cost of £1,800 in this study is lower than the median cost of  
18 £3,716 calculated by Jenks *et al.*<sup>21</sup> There were differences between the two studies  
19 in length of stay calculated to be attributable to surgical site infection between (4  
20 days versus 2.6 in this study). Our study used a case-matching methodology to  
21 account for both time at risk and extraneous factors which would lead to an  
22 overestimation of excess length of stay. This, along with our inclusion of data from  
23 multiple centres as opposed to a single site may account for differences in our cost  
24 estimates. In our multicentre study the majority of infections (52%) detected at  
25 readmission and 24% of those detected during the initial inpatient stay were the  
26 more serious infections (deep incisional or organ/space) which are likely to require  
27 more extensive treatment, such as debridement or re-suturing, than superficial  
28 infections. In contrast only 13% of midwife detected surgical site infections were  
29 deep or organ/space infections.  
30  
31  
32  
33  
34  
35  
36  
37  
38  
39  
40  
41  
42  
43  
44  
45  
46  
47  
48  
49  
50  
51  
52  
53  
54  
55  
56  
57  
58  
59  
60

1  
2  
3 Previous studies have focussed primarily on hospital costs.<sup>21-23</sup> By including an  
4  
5 estimate of the costs in the community in this analysis a more representative  
6  
7 estimate of overall economic burden to the health service was achieved. More than  
8  
9 28% of the economic burden arose in the community where the majority of these  
10  
11 infections are managed. A study of breast surgery in England which included post-  
12  
13 discharge follow-up also found a similar proportion of costs incurred in the  
14  
15 community (31%).<sup>24</sup> In contrast a study conducted in Scotland in 2001, using actual  
16  
17 rather than estimated bed days and general practitioner visits, identified 11% of  
18  
19 treatment costs resulting from surgical site infection occurred in the community.<sup>25</sup>  
20  
21 However, that study included non-obstetric surgical procedures (which would not  
22  
23 have incurred midwife costs).  
24  
25  
26  
27  
28

### 29 Limitations

30  
31 As well as applying the National Schedule Reference Costs to provide the average  
32  
33 cost of hospital stay, rather than actual observed expenditure, various assumptions  
34  
35 have been made in this study including the number of extra midwife and general  
36  
37 practitioner appointments resulting from infection. However, there are likely to be  
38  
39 additional costs to those outlined. For example, some of the patients readmitted for  
40  
41 more serious infections may also require a hospital outpatient follow-up appointment  
42  
43 or further general practitioner visits. Also, additional outpatient appointments and  
44  
45 more than one course of antibiotics may be needed to treat infections identified by  
46  
47 midwives and general practitioners. Given that our analysis was based on  
48  
49 healthcare utilisation, excluding additional costs (direct and indirect) incurred by the  
50  
51 affected women or their carers, the true costs associated with these infections are  
52  
53 likely to be higher than our estimates. The intangible costs resulting from the pain  
54  
55 and suffering of the women were not assessed although wound infections and  
56  
57  
58  
59  
60

1  
2  
3 endometritis following caesarean section have been reported to increase anxiety and  
4 delay physical recovery for these women, with consequent impact on their ability to  
5 care for their new born.<sup>26</sup> Whilst the majority of women will be on maternity leave,  
6 family members or other carers may require time off work to look after the patient or  
7 to provide childcare for the new-born or other children. An extensive prospective  
8 study would be required to gain more comprehensive information on the detailed  
9 costs associated with surgical site infection following caesarean section.  
10  
11  
12  
13  
14  
15  
16  
17  
18  
19

20 Although the reductions in surgical site infection risk in the model are supported by  
21 the data from the cohort study (Figure 1) the surveillance was only repeated once  
22 and two of hospitals did not achieve reductions. Therefore, there is no guarantee  
23 that such reductions would be sustained over time. Additionally, decreases in risk of  
24 infection between surveillance cycles will in reality vary over time within a given  
25 hospital and a constant rate of reduction in infections is unlikely to offer a true  
26 reflection of this pattern. This study has applied an average reduction rate in risk of  
27 infection but, as further information becomes available on patterns of reduction, the  
28 model can be adapted.  
29  
30  
31  
32  
33  
34  
35  
36  
37  
38  
39  
40  
41

42 There may be additional costs associated with setting up and running surveillance  
43 such as training community midwives and feedback meetings with surgeons but  
44 these costs can be minimised by incorporating time into existing infection prevention,  
45 maternity or surgical meetings. Whilst it could be argued that surveillance drives  
46 adherence to infection control practices that should be in place already, where such  
47 measures are not in place additional infection prevention and control measures may  
48 incur costs. However, changes to many infection prevention measures may be cost-  
49  
50  
51  
52  
53  
54  
55  
56  
57  
58  
59  
60

1  
2  
3 neutral and additional costs for specific interventions can be considered once  
4  
5 identified.  
6  
7

8  
9 The community costs estimated in this study are not incurred by the hospital and, as  
10  
11 hospitals would not realise any savings from community care by reducing these  
12  
13 infections, this could be a disincentive to hospitals carrying out surveillance and  
14  
15 setting up new infection control measures.  
16  
17

### 18 19 Implications for surveillance

20  
21 Surgical site infection surveillance schemes which include feedback of results to  
22  
23 surgeons have been found to reduce risk of infections<sup>27 28</sup> and individual hospitals  
24  
25 have successfully reduced infection risk by applying measures to improve practice.<sup>15</sup>  
26  
27  
28<sup>29</sup> The NICE<sup>30</sup> and WHO<sup>31</sup> guidelines for preventing surgical site infection  
29  
30 recommend various approaches to reduce infection risk including the timing of  
31  
32 antimicrobial prophylaxis, avoiding shaving, antiseptic skin preparation, maintaining  
33  
34 patient homeostasis, covering wounds with an interactive dressing and prevention of  
35  
36 hypothermia.<sup>32</sup> Whilst health services may aim to achieve a zero risk of infection, it  
37  
38 is likely that there is an irreducible minimum risk for some surgical categories beyond  
39  
40 which there will be limited opportunities for further reductions. Such a possibility was  
41  
42 built into the model. In some hospitals, high infection risks may be due to underlying  
43  
44 systemic problems and reductions in infection risk may take longer in these more  
45  
46 complex situations. Local needs of individual hospitals will need to be assessed.  
47  
48  
49  
50

51  
52 This study estimated the cost of surveillance for one 3-month period as £4,282 for a  
53  
54 model hospital conducting 800 caesarean sections a year. A continuous  
55  
56 surveillance programme would provide a more rapid decrease in infection risk, when  
57  
58 accompanied by improvements in care, than surveillance strategies of one or two  
59  
60

1  
2  
3 quarters a year. However, although the continuous surveillance model achieved  
4 savings for hospitals with higher baseline infection risk, it did not achieve the  
5  
6 greatest balance of saving against costs of surveillance over the 5 year simulation  
7  
8 period for scenarios with a 10% reduction in infections between surveillance periods.  
9  
10 The variable surveillance model achieved similar or greater savings or smaller losses  
11  
12 for all baseline infection risks. Extrapolating from these findings, hospitals could  
13  
14 consider a variable surveillance strategy of continuous surveillance for hospitals with  
15  
16 high risk of infection (greater than 10%) to rapidly reduce infections and patient harm  
17  
18 as quickly as possible. Surveillance for caesarean section could then be reduced to  
19  
20 two quarters a year once the infection risk has decreased to 10% and to one quarter  
21  
22 per year when the infection risk declines to 5% to maximise savings. In terms of cost  
23  
24 saving this approach is supported by the model estimates for such a variable  
25  
26 surveillance programme identified by this study. A minimum surveillance strategy of  
27  
28 one quarter a year would then be useful to reinforce infection control measures and  
29  
30 provide continued vigilance to sustain low levels of infection. However, the strategy  
31  
32 outlined in this model may not be applicable to other surgical categories, particularly  
33  
34 those with a low infection risk.  
35  
36  
37  
38  
39  
40  
41  
42

43 Although a variable surveillance strategy can be less costly and can be tailored to  
44  
45 the baseline infection risk of a hospital, conducting continuous surveillance has  
46  
47 advantages. These include having well established surveillance systems with  
48  
49 methodology embedded in practice, and providing a more precise estimate of  
50  
51 infection risk where surgical volumes are low. Additional savings to those presented  
52  
53 in this study could be achieved through reducing surveillance costs, for example  
54  
55 through use of patient-facing digital technologies, currently under development, to  
56  
57 collect patient-reported infections.<sup>33</sup>  
58  
59  
60

## Patient outcomes

The number of caesarean sections performed each year in England has been rising since the 1980s<sup>2</sup> accompanied by an increase in the proportion of women of child bearing age who are obese.<sup>34</sup> High BMI has been identified as a key risk factor for surgical site infection following caesarean section.<sup>6</sup> This means that with rising obesity surgical site infections are likely to become an increasing burden for the health service. Reducing the risk of infections following caesarean section is an important health issue for these women who are otherwise generally young and healthy.

The multi-centre cohort study identified 1 in 10 women with surgical site infection following caesarean section.<sup>6</sup> There is currently no national surveillance for surgical site infection following caesarean section in England, although it is mandatory in Scotland, Wales and Northern Ireland and there is considerable support from hospitals to introduce this in England.<sup>35 36</sup>

Although costs incurred by surgical site infection following caesarean section are lower than those associated with infections following orthopaedic and other surgical categories,<sup>37-40</sup> infections post-caesarean can still lead to serious outcomes,<sup>7 41 42</sup> and may give rise to high cost clinical negligence claims.<sup>43</sup> However, the decision to attempt to reduce risk of surgical site infection is not solely about cost saving. Hospitals have a duty to avoid harm to the patient, reduce antibiotic consumption and improve patient experience.

## Conclusion

Surgical site infection following caesarean section causes pain and anxiety to new mothers and incurs a financial burden to the healthcare system in both community and

1  
2  
3 hospital healthcare settings. Integrating caesarean section surveillance into the  
4  
5 national surveillance programme would provide hospitals with the infrastructure (and  
6  
7 national benchmark) for reducing infection by feeding back data and there by  
8  
9 empowering staff to take action to improve patient care and potentially reduce costs.  
10  
11  
12  
13  
14  
15  
16  
17  
18  
19  
20  
21  
22  
23  
24  
25  
26  
27  
28  
29  
30  
31  
32  
33  
34  
35  
36  
37  
38  
39  
40  
41  
42  
43  
44  
45  
46  
47  
48  
49  
50  
51  
52  
53  
54  
55  
56  
57  
58  
59  
60

For peer review only

1  
2  
3 **Acknowledgements:** We would like to thank Julie Robotham (PHE) for her expert guidance  
4 as well as the hospitals who contributed information on the cost of microbiological screening  
5 and surveillance resources.  
6  
7  
8

9  
10 We would also like to thank NHS Digital for permission to reuse Hospital Episode Statistics  
11 (HES), Copyright NHS Digital © 2010. All rights reserved.  
12  
13

14  
15 **Contributors:** CW and TL designed the study. CW, JC, PH and ES sourced cost data. CW  
16 analysed the cost data, constructed the initial cost model and wrote the paper. NG  
17 conducted the paired matching analysis and AJVH calculated uncertainty and advised on the  
18 model construction and JW designed the multi-centre study. All authors critically reviewed  
19 and contributed to the final draft of the paper. TL is the guarantor.  
20  
21  
22  
23  
24  
25

26  
27 **Funding:** This research received no specific grant from any funding agency in the public,  
28 commercial or not-for-profit sectors  
29  
30

31  
32 **Competing interests:** None declared  
33  
34

35 **Ethical approval:** Not needed for this type of study. Public Health England has approval  
36 from the Confidentiality Advisory Group of the Health Research Authority for the processing  
37 of confidential patient information in support of the PHE Surgical Site Infection Surveillance  
38 Service through its devolved responsibility under Regulation 3 of the Health Service (Control  
39 of Patient Information) Regulations of 2002 (made under the powers given to the Secretary  
40 of State in Section 251, NHS Act 2006). Regulation 3: Surveillance and control of public  
41 health hazards explicitly including infectious disease.  
42  
43  
44  
45  
46  
47  
48  
49

50  
51 **Patient consent for publication:** Not required  
52

53  
54 **Provenance and peer review:** Not commissioned; externally peer reviewed  
55

56  
57 **Data availability statement:** No additional data available  
58  
59  
60



## Figure Legends

**Figure 1.** Change in surgical site infection (SSI) risk between consecutive 3 month surveillance periods for 7 hospitals during the multi-centre caesarean section study

**Figure 2.** Balance of surveillance cost versus savings from reductions of 10, 20 and 30% per surveillance period for surveillance strategies of one quarter a year, two quarters a year and continuous surveillance for starting surgical site infection (SSI) risk of 5%

**Figure 3.** Balance of surveillance cost versus savings from reductions of 10, 20 and 30% per surveillance period for surveillance strategies of one quarter a year, two quarters a year and continuous surveillance for starting surgical site infection (SSI) risk of 10%

**Figure 4.** Balance of surveillance cost versus savings from reductions of 10, 20 and 30% per surveillance period for surveillance strategies of one quarter a year, two quarters a year and continuous surveillance for starting surgical site infection (SSI) risk of 15%

**Figure 5.** Balance of surveillance cost versus savings from reductions in surgical site infection risk of 10, 20 and 30% per surveillance period for baseline surgical site infection (SSI) risk of 10 or 15% using a variable surveillance strategy (continuous surveillance when the infection risk is above 10%, two quarters per year surveillance for infection risk between 5 and 10% and one quarter per year surveillance for infection risk below 5%)

**Figure 6.** Cumulative discounted prevented costs against costs of surveillance after 5-year surveillance programme - 15% Baseline surgical site infection risk

**Figure 7.** Cumulative discounted prevented costs against costs of surveillance after 5-year surveillance programme - 10% Baseline surgical site infection risk

**Figure 8.** Cumulative discounted prevented costs against costs of surveillance after 5-year surveillance programme - 5% Baseline surgical site infection risk

## References

1. OECD. Health at a Glance 2017: OECD Indicators. *OECD* 2018 .  
[https://www.oecd-ilibrary.org/social-issues-migration-health/health-at-a-glance-2017\\_health\\_glance-2017-en](https://www.oecd-ilibrary.org/social-issues-migration-health/health-at-a-glance-2017_health_glance-2017-en) (accessed 9/14/2018).
2. NHS Digital. NHS Maternity Statistics, England 2017-18. *NHS Digital* 2018 .  
<https://digital.nhs.uk/data-and-information/publications/statistical/nhs-maternity-statistics/2017-18> (accessed 10/25/2018).
3. Ward VP, Charlett A, Fagan J, et al. Enhanced surgical site infection surveillance following caesarean section: experience of a multicentre collaborative post-discharge system. *J Hosp Infect* 2008;70(2):166-73.
4. Johnson A, Young D, Reilly J. Caesarean section surgical site infection surveillance. *J Hosp Infect* 2006;64(1):30-35.
5. Caesarean-section surgical site infection surveillance. Annual report: all Wales. *Public Health Wales* 2017.  
[http://www2.nphs.wales.nhs.uk:8080/WHAIPDocs.nsf/3dc04669c9e1eaa880257062003b246b/5b9c050161b447408025821100359f6f/\\$FILE/2016%20All%20Wales%20SSI%20Annual%20Report%20-%20V1.pdf](http://www2.nphs.wales.nhs.uk:8080/WHAIPDocs.nsf/3dc04669c9e1eaa880257062003b246b/5b9c050161b447408025821100359f6f/$FILE/2016%20All%20Wales%20SSI%20Annual%20Report%20-%20V1.pdf) (accessed 6/12/2018).
6. Wloch C, Wilson J, Lamagni T, et al. Risk factors for surgical site infection following caesarean section in England: results from a multicentre cohort study. *BJOG* 2012;119(11):1324-33. doi: 10.1111/j.1471-0528.2012.03452.x [doi]
7. Cantwell R, Clutton-Brock T, Cooper G, et al. Saving Mothers' Lives: Reviewing maternal deaths to make motherhood safer: 2006-2008. The Eighth Report of the Confidential Enquiries into Maternal Deaths in the United Kingdom. *BJOG* 2011;118(Suppl 1):1-203.
8. Haley RW, Culver DH, White JW, et al. The efficacy of infection surveillance and control programs in preventing nosocomial infections in US hospitals. *Am J Epidemiol* 1985;121(2):182-205.
9. Gastmeier P, Geffers C, Brandt C, et al. Effectiveness of a nationwide nosocomial infection surveillance system for reducing nosocomial infections. *J Hosp Infect* 2006;64(1):16-22.
10. Abbas M, de Kraker MEA, Aghayev E, et al. Impact of participation in a surgical site infection surveillance network: results from a large international cohort study. *J Hosp Infect* 2019;102(3):267-76. doi: 10.1016/j.jhin.2018.12.003
11. Wilson J, Wloch C, Saei A, et al. Inter-hospital comparison of rates of surgical site infection following caesarean section delivery: evaluation of a multicentre surveillance study. *J Hosp Infect* 2013;84(1):44-51. doi: S0195-6701(13)00051-0 [pii];10.1016/j.jhin.2013.01.009 [doi]
12. Department of Health. 2010-11 reference costs publication. *Department of Health* 2018. <https://www.gov.uk/government/publications/2010-11-reference-costs-publication> (accessed 7/25/2018).

13. Business Services Authority. NHS Drugs Tariff. *Business Services Authority* 2018. <https://www.nhsbsa.nhs.uk/pharmacies-gp-practices-and-appliance-contractors/drug-tariff> (accessed 7/25/2018).
14. National Institute for Health and Care Excellence. Guide to methods of technology appraisal 2013. <https://www.nice.org.uk/process/pmg9/chapter/foreword> (accessed 7/6/2017).
15. Dyrkorn OA, Kristoffersen M, Walberg M. Reducing post-caesarean surgical wound infection rate: an improvement project in a Norwegian maternity clinic. *BMJ Qual Saf* 2012;21(3):206-10. doi: bmjqs-2011-000316 [pii];10.1136/bmjqs-2011-000316 [doi]
16. Corcoran S, Jackson V, Coulter-Smith S, et al. Surgical site infection after cesarean section: implementing 3 changes to improve the quality of patient care. *Am J Infect Control* 2013;41(12):1258-63. doi: S0196-6553(13)00892-4 [pii];10.1016/j.ajic.2013.04.020 [doi]
17. European Centre for Disease Prevention and Control. Surveillance of surgical site infections in Europe, 2010-2011. *European Centre for Disease Prevention and Control* 2013. <https://www.ecdc.europa.eu/en/publications-data/surveillance-surgical-site-infections-europe-2010-2011> (accessed 12/03/2020)
18. OECD. Inflation (CPI)(Indicator). *OECD* 2019. <https://data.oecd.org/price/inflation-cpi.htm> (accessed 1/16/2019).
19. Kappstein I, Schulgen G, Beyer U, et al. Prolongation of hospital stay and extra costs due to ventilator-associated pneumonia in an intensive care unit. *Eur J Clin Microbiol Infect Dis* 1992;11(6):504-08.
20. De AG, Murthy A, Beyersmann J, et al. Estimating the impact of healthcare-associated infections on length of stay and costs. *Clin Microbiol Infect* 2010;16(12):1729-35. doi: CLM3332 [pii];10.1111/j.1469-0691.2010.03332.x [doi]
21. Jenks PJ, Laurent M, McQuarry S, et al. Clinical and economic burden of surgical site infection (SSI) and predicted financial consequences of elimination of SSI from an English hospital. *J Hosp Infect* 2014;86(1):24-33. doi: S0195-6701(13)00344-7 [pii];10.1016/j.jhin.2013.09.012 [doi]
22. Olsen MA, Butler AM, Willers DM, et al. Attributable costs of surgical site infection and endometritis after low transverse cesarean delivery. *Infect Control Hosp Epidemiol* 2010;31(3):276-82.
23. Mugford M, Kingston J, Chalmers I. Reducing the incidence of infection after caesarean section: implications of prophylaxis with antibiotics for hospital resources. *BMJ* 1989;299(6706):1003-06.
24. Tanner J, Khan D, Ball J, et al. The rate, risk factors and cost of surgical site infection in primary breast surgery. *Journal of Infection Prevention* 2011;12(5):204-09. doi: 10.1177/1757177411411123
25. Reilly J, Twaddle S, McIntosh J, et al. An economic analysis of surgical wound infection. *J Hosp Infect* 2001;49(4):245-49.

- 1  
2  
3 26. Kealy MA, Small RE, Liamputtong P. Recovery after caesarean birth: a  
4 qualitative study of women's accounts in Victoria, Australia. *BMC Pregnancy*  
5 *Childbirth* 2010;10:47.  
6
- 7 27. Barwolff S, Sohr D, Geffers C, et al. Reduction of surgical site infections after  
8 Caesarean delivery using surveillance. *J Hosp Infect* 2006;64(2):156-61.  
9
- 10 28. Astagneau P, L'Heriteau F, Daniel F, et al. Reducing surgical site infection  
11 incidence through a network: results from the French ISO-RAISIN surveillance  
12 system. *J Hosp Infect* 2009;72(2):127-34.  
13
- 14 29. Gregson H. Reducing surgical site infection following caesarean section. *Nurs*  
15 *Stand* 2011;25(50):35-40.  
16
- 17 30. National Collaborating Centre for Women's and Children's Health. Surgical site  
18 infection - prevention and treatment of surgical site infection. Clinical  
19 Guideline 74. *NICE* 2008. <http://www.nice.org.uk/guidance/CG74> (accessed  
20 10/23/2015).  
21
- 22 31. World Health Organisation. Global guidelines for the prevention of surgical site  
23 infection. 2016. <http://www.who.int/gpsc/ssi-guidelines/en/> (accessed  
24 7/6/2017).  
25
- 26 32. National Institute for Health and Care Excellence. Hypothermia: prevention and  
27 management in adults having surgery, CG65. 2016.  
28 <https://www.nice.org.uk/guidance/cg65> (accessed 7/6/2017).  
29
- 30 33. Public Health England. Surveillance of surgical site infections in NHS hospitals in  
31 England 2015/16. *Public Health England* 2016.  
32 [https://www.gov.uk/government/publications/surgical-site-infections-ssi-](https://www.gov.uk/government/publications/surgical-site-infections-ssi-surveillance-nhs-hospitals-in-england)  
33 [surveillance-nhs-hospitals-in-england](https://www.gov.uk/government/publications/surgical-site-infections-ssi-surveillance-nhs-hospitals-in-england). (accessed 12/03/2020)  
34
- 35 34. Health Survey for England, 2016. *NHS Digital* 2017. [https://digital.nhs.uk/data-](https://digital.nhs.uk/data-and-information/publications/statistical/health-survey-for-england/health-survey-for-england-2016)  
36 [and-information/publications/statistical/health-survey-for-england/health-](https://digital.nhs.uk/data-and-information/publications/statistical/health-survey-for-england/health-survey-for-england-2016)  
37 [survey-for-england-2016](https://digital.nhs.uk/data-and-information/publications/statistical/health-survey-for-england/health-survey-for-england-2016). (accessed 12/03/2020)  
38
- 39 35. Scotland HP. Pan Celtic Collaborative Surgical Site Infection Surveillance  
40 Report: Surveillance of surgical site infection for caesarean section  
41 procedures performed in Northern Ireland, Scotland and Wales in 2008:  
42 Health Protection Scotland; 2014. [https://www.hps.scot.nhs.uk/web-](https://www.hps.scot.nhs.uk/web-resources-container/pan-celtic-collaborative-surgical-site-infection-surveillance-report-surveillance-of-surgical-site-infection-for-caesarean-section-procedures-performed-in-northern-ireland-scotland-and-wales-in-2008)  
43 [resources-container/pan-celtic-collaborative-surgical-site-infection-](https://www.hps.scot.nhs.uk/web-resources-container/pan-celtic-collaborative-surgical-site-infection-surveillance-report-surveillance-of-surgical-site-infection-for-caesarean-section-procedures-performed-in-northern-ireland-scotland-and-wales-in-2008)  
44 [surveillance-report-surveillance-of-surgical-site-infection-](https://www.hps.scot.nhs.uk/web-resources-container/pan-celtic-collaborative-surgical-site-infection-surveillance-report-surveillance-of-surgical-site-infection-for-caesarean-section-procedures-performed-in-northern-ireland-scotland-and-wales-in-2008)  
45 [section-procedures-performed-in-northern-ireland-scotland-and-wales-in-2008](https://www.hps.scot.nhs.uk/web-resources-container/pan-celtic-collaborative-surgical-site-infection-surveillance-report-surveillance-of-surgical-site-infection-for-caesarean-section-procedures-performed-in-northern-ireland-scotland-and-wales-in-2008)  
46 accessed 12/03/2020.  
47
- 48 36. Godbole G, Wloch C, Harrington P, et al. Future priorities of acute hospitals for  
49 surgical site infection surveillance in England. *J Hosp Infect* 2018 doi: S0195-  
50 6701(18)30330-X [pii];10.1016/j.jhin.2018.06.016 [doi]  
51
- 52 37. Coello R, Charlett A, Wilson J, et al. Adverse impact of surgical site infections in  
53 English hospitals. *J Hosp Infect* 2005;60(2):93-103.  
54
- 55 38. Merollini KM, Crawford RW, Whitehouse SL, et al. Surgical site infection  
56 prevention following total hip arthroplasty in Australia: a cost-effectiveness  
57 analysis. *Am J Infect Control* 2013;41(9):803-09. doi: S0196-6553(13)00054-0  
58 [pii];10.1016/j.ajic.2012.11.015 [doi]  
59  
60

- 1  
2  
3 39. Badia JM, Casey AL, Petrosillo N, et al. Impact of surgical site infection on  
4 healthcare costs and patient outcomes: a systematic review in six European  
5 countries. *J Hosp Infect* 2017;96(1):1-15. doi: S0195-6701(17)30135-4  
6 [pii];10.1016/j.jhin.2017.03.004 [doi]  
7  
8 40. Vanhegan IS, Malik AK, Jayakumar P, et al. A financial analysis of revision hip  
9 arthroplasty: the economic burden in relation to the national tariff. *J Bone Joint*  
10 *Surg Br* 2012;94(5):619-23. doi: 10.1302/0301-620X.94B5.27073 [published  
11 Online First: 2012/04/25]  
12  
13 41. Schumacher H, Tehrani H, Irwin MS, et al. Abdominoplasty as an adjunct to the  
14 management of peri-Caesarian section necrotising fasciitis. *J Plast Reconstr*  
15 *Aesthet Surg* 2008;61(7):807-10. doi: S1748-6815(07)00153-2  
16 [pii];10.1016/j.bjps.2005.11.048 [doi]  
17  
18 42. Melendez J, Claxton A, Erskine K. MRSA bacteraemia after caesarean section  
19 wound infection: when screening is missed and things go wrong. *Arch*  
20 *Gynecol Obstet* 2012;285(3):663-65. doi: 10.1007/s00404-011-2066-8 [doi]  
21  
22 43. National Audit Office. Managing the costs of clinical negligence in trusts. *National*  
23 *Audit Office* 2017. [https://www.nao.org.uk/report/managing-the-costs-of-](https://www.nao.org.uk/report/managing-the-costs-of-clinical-negligence-in-trusts/)  
24 [clinical-negligence-in-trusts/](https://www.nao.org.uk/report/managing-the-costs-of-clinical-negligence-in-trusts/) (accessed 11/1/2018).  
25  
26  
27  
28  
29  
30  
31  
32  
33  
34  
35  
36  
37  
38  
39  
40  
41  
42  
43  
44  
45  
46  
47  
48  
49  
50  
51  
52  
53  
54  
55  
56  
57  
58  
59  
60

**Figure 1.** Change in surgical site infection (SSI) risk between consecutive 3 month surveillance periods for 7 hospitals during the multi-centre caesarean section study

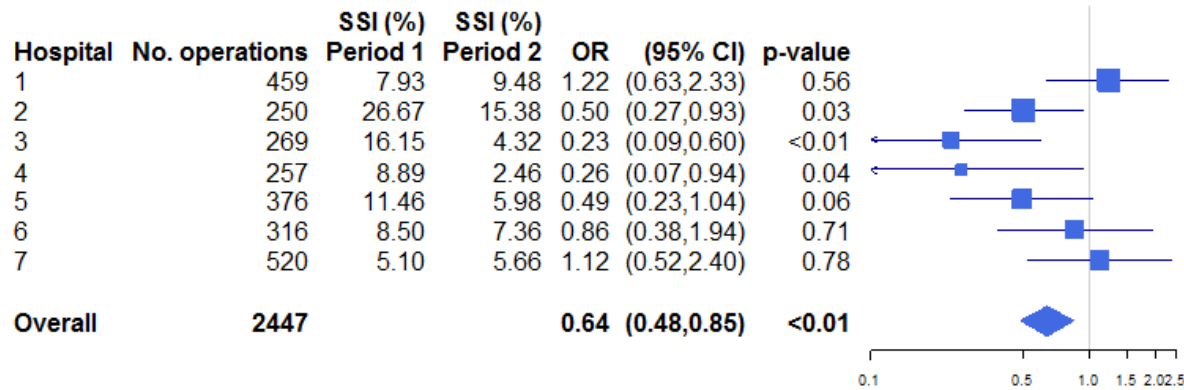

**Figure 2.** Balance of surveillance cost versus savings from reductions of 10, 20 and 30% per surveillance period for surveillance strategies of one quarter a year, two quarters a year and continuous surveillance for starting surgical site infection (SSI) risk of 5%

Model assumes reductions in infection risk are achieved in conjunction with improvement programmes during surveillance periods and maintained between each surveillance period. No further reductions in risk of infection were included in the model once a postulated minimum SSI risk of 3% was reached.

**Key:** Surveillance strategy      Reductions in SSI risk

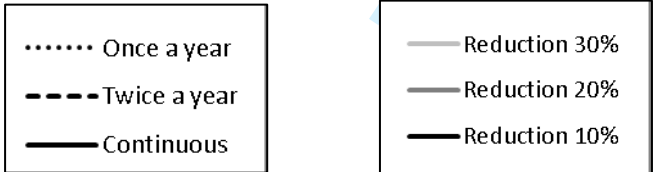

i) SSI risk (%)

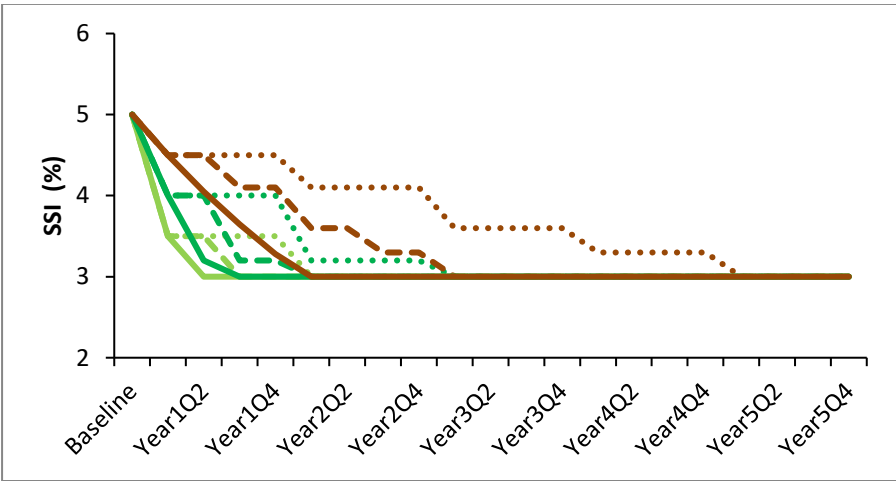

ii) balance of discounted cost versus savings

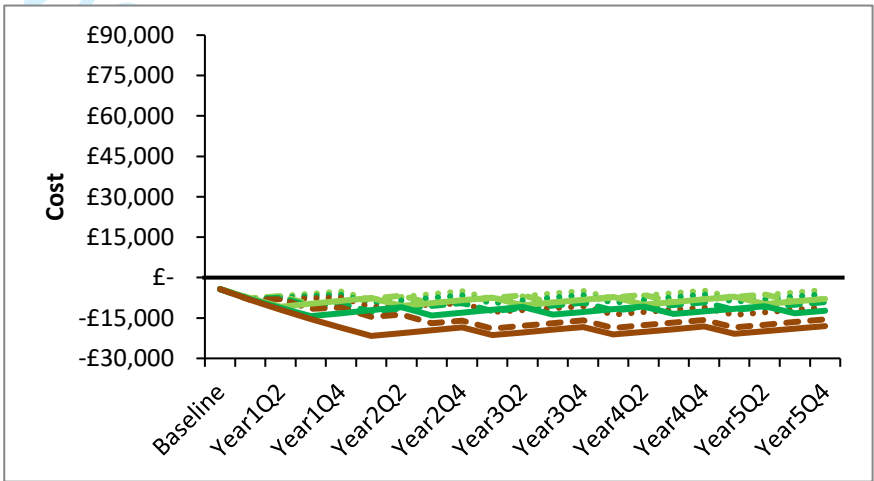

**Figure 3.** Balance of surveillance cost versus savings from reductions of 10, 20 and 30% per surveillance period for surveillance strategies of one quarter a year, two quarters a year and continuous surveillance for starting surgical site infection (SSI) risk of 10%

Model assumes reductions in infection risk are achieved in conjunction with improvement programmes during surveillance periods and maintained between each surveillance period. No further reductions in risk of infection were included in the model once a postulated minimum SSI risk of 3% was reached.

**Key:** Surveillance strategy      Reductions in SSI risk

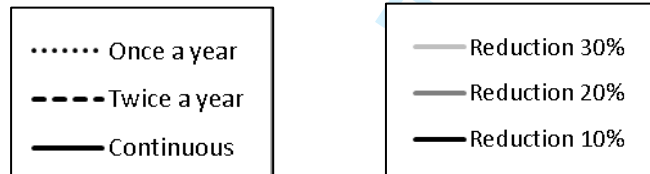

i) SSI risk (%)

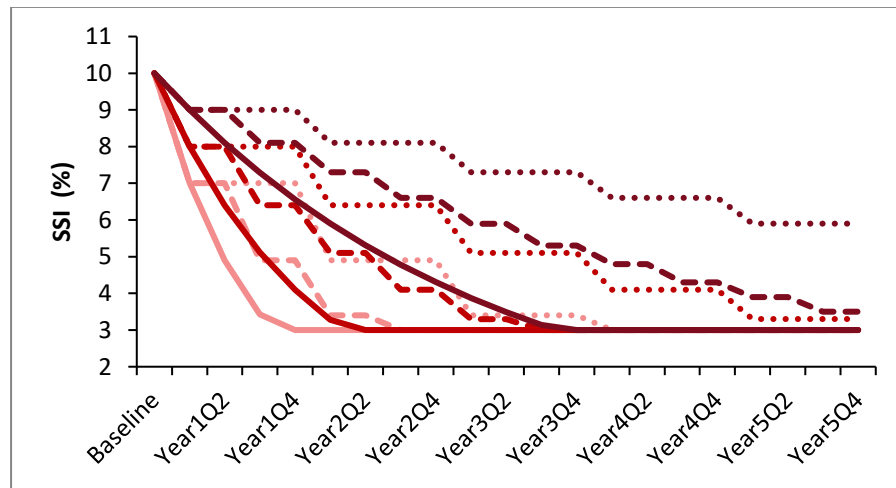

ii) balance of discounted cost versus savings

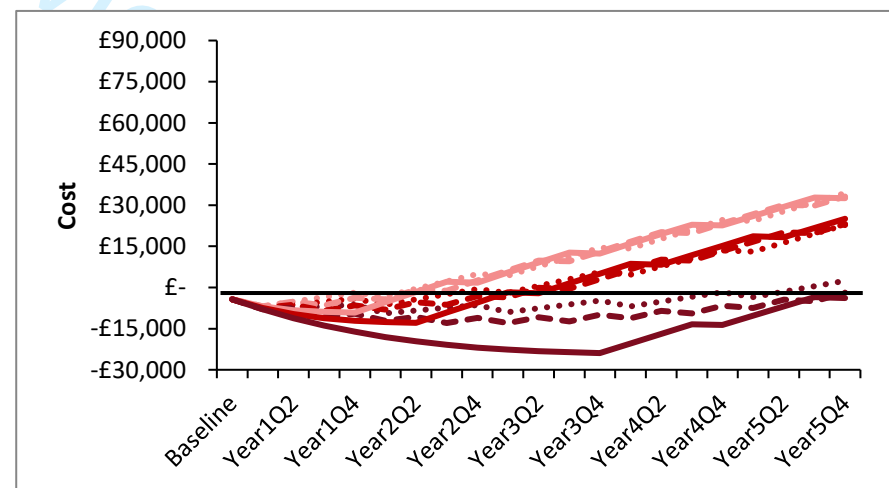



**Figure 4.** Balance of surveillance cost versus savings from reductions of 10, 20 and 30% per surveillance period for surveillance strategies of one quarter a year, two quarters a year and continuous surveillance for starting surgical site infection (SSI) risk of 15%

Model assumes reductions in infection risk are achieved in conjunction with improvement programmes during surveillance periods and maintained between each surveillance period. No further reductions in risk of infection were included in the model once a postulated minimum SSI risk of 3% was reached.

**Key:** Surveillance strategy      Reductions in SSI risk



i) SSI risk (%)

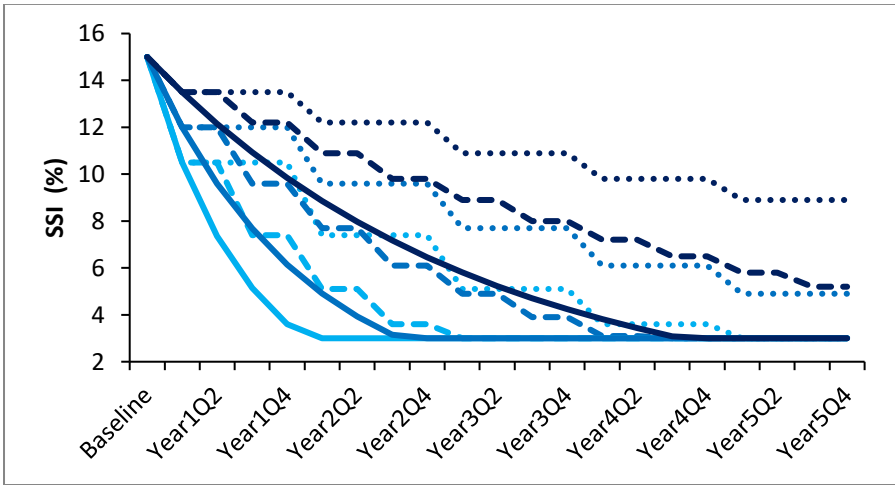

ii) balance of discounted cost versus savings

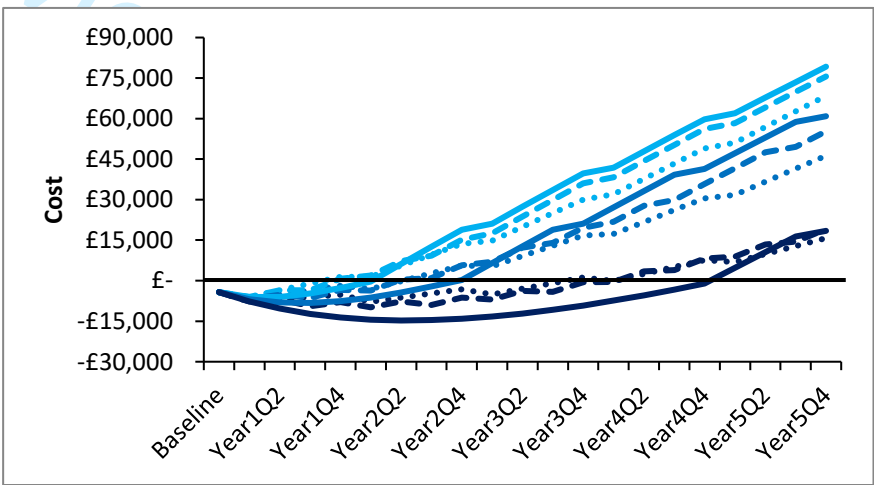

**Figure 5.** Balance of surveillance cost versus savings from reductions in surgical site infection risk of 10, 20 and 30% per surveillance period for baseline surgical site infection (SSI) risk of 10 or 15% using a variable surveillance strategy (continuous surveillance when the infection risk is above 10%, two quarters per year surveillance for infection risk between 5 and 10% and one quarter per year surveillance for infection risk below 5%)

Model assumes reductions in risk of infection are achieved in conjunction with improvement programmes during surveillance periods and maintained between each surveillance period. No further reductions in risk of infection were included once a postulated minimum SSI risk of 3% was reached.

Key: Reductions in risk      Baseline SSI risk



i) SSI risk (%)

ii) balance of discounted cost versus savings



**Figure 6.** Cumulative discounted prevented costs against costs of surveillance after 5-year surveillance programme – 15% baseline surgical site infection risk

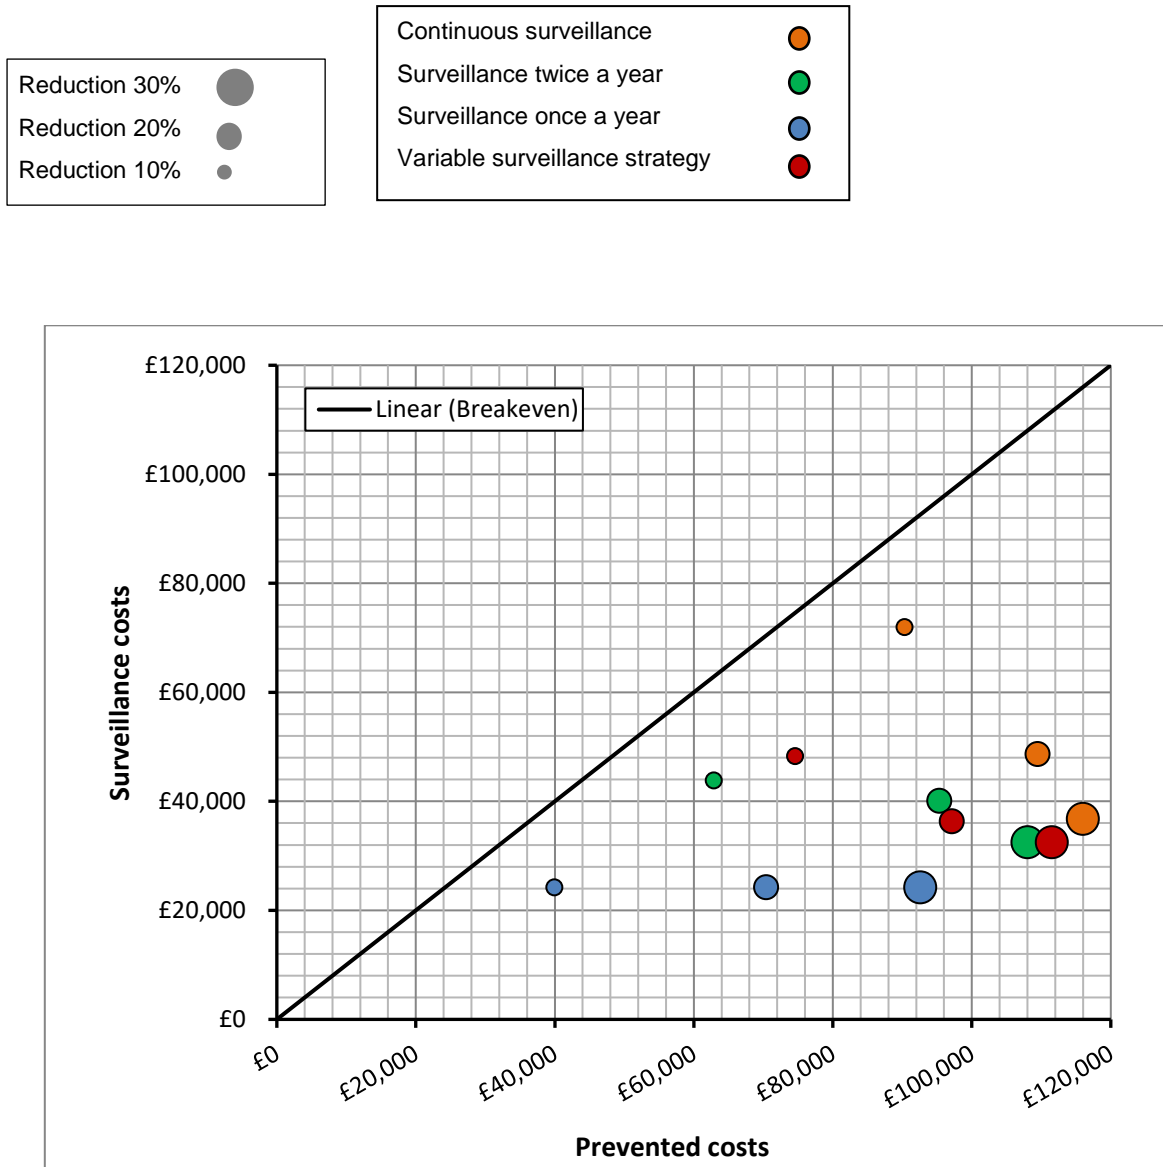

**Figure 7.** Cumulative discounted prevented costs against costs of surveillance after 5-year surveillance programme – 10% baseline surgical site infection risk

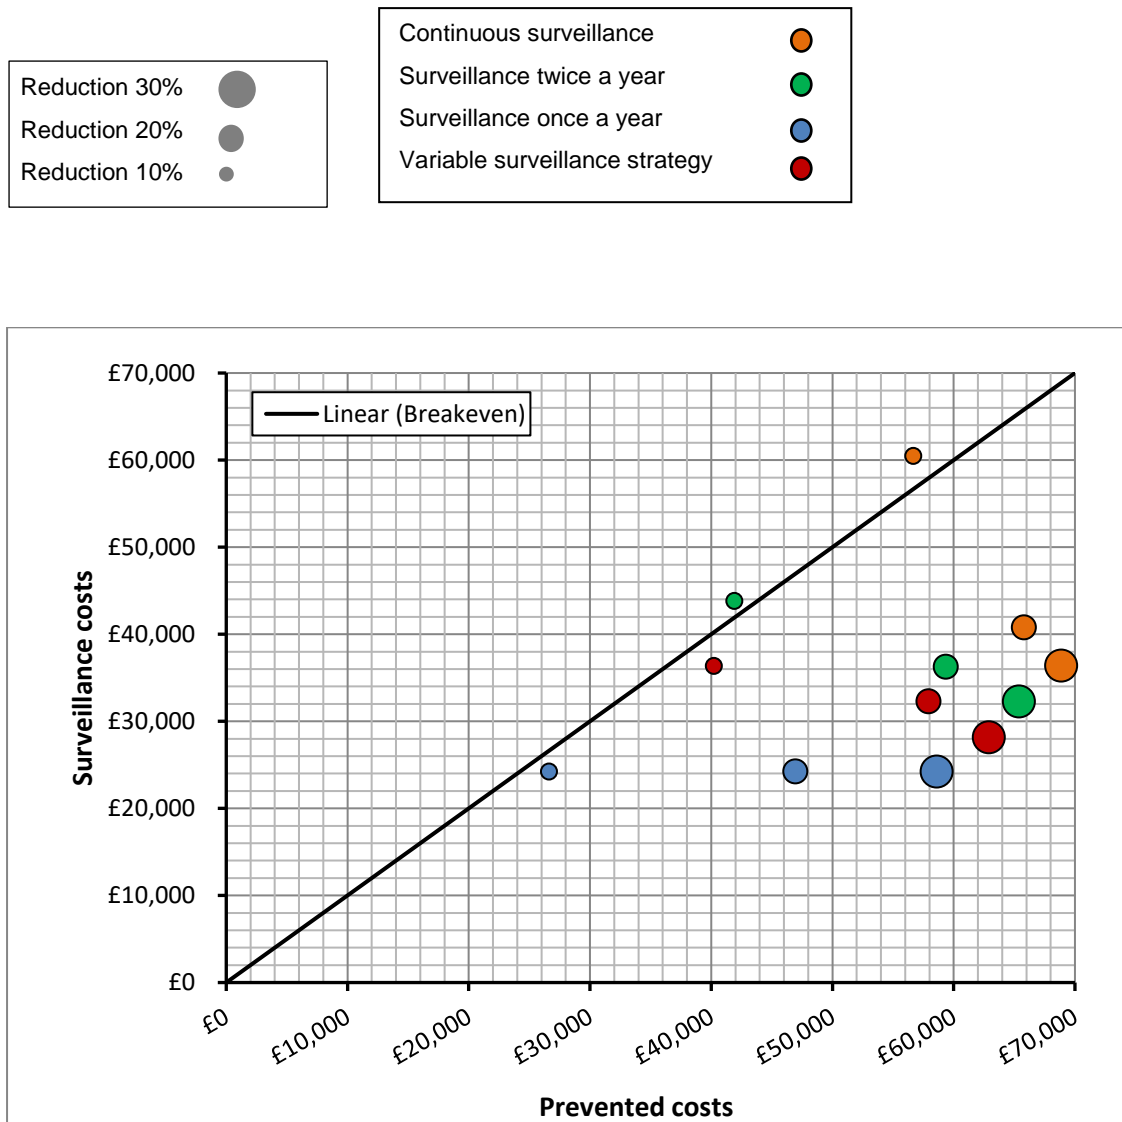

**Figure 8.** Cumulative discounted prevented costs against costs of surveillance after 5-year surveillance programme – 5% baseline surgical site infection risk

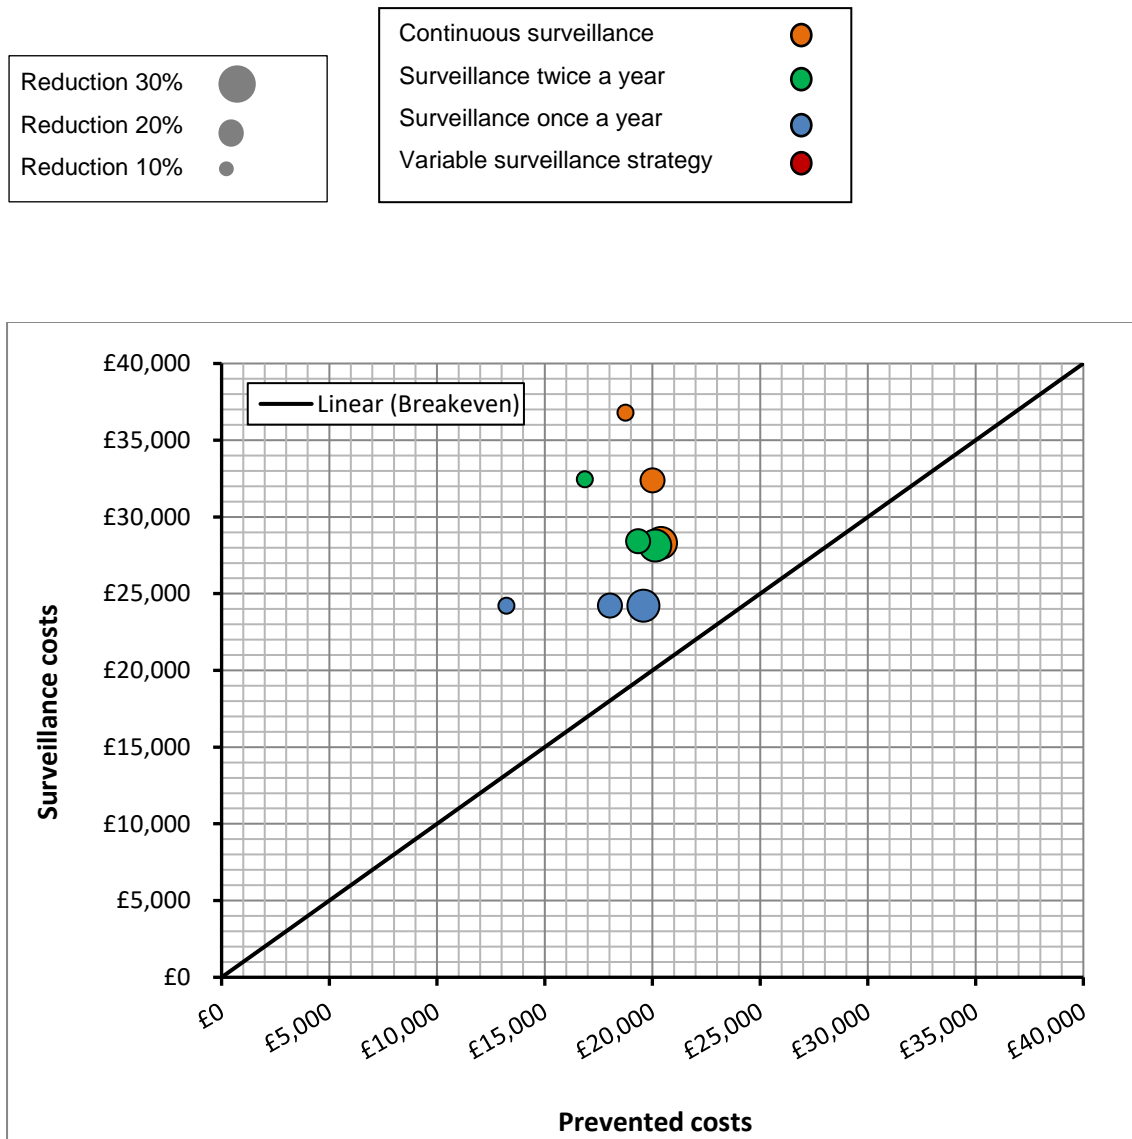

\*Variable surveillance strategy is equivalent to once-a-year surveillance where SSI risk is <5%



**No. C-section per year**  
**Baseline SSI rate (>3.0%)**  
**Reduction SSI due to action (%)**  
**Discounting**

|       |
|-------|
| 800   |
| 10    |
| 20%   |
| 3.50% |

**Quarterly cost surveillance cost per 1% SSI rate**  
**Total cost of disease per year**

|           |
|-----------|
| £4,282    |
| £2,251.95 |
| £22,520   |

**Years until cost-saving** **3.375**      999= more than 25 years

1  
2  
3  
4  
5  
6  
7  
8  
9  
10  
11  
12  
13  
14  
15  
16  
17  
18  
19  
20  
21  
22  
23  
24  
25  
26  
27  
28  
29  
30  
31  
32  
33  
34  
35  
36  
37  
38  
39  
40  
41  
42  
43  
44  
45  
46

| Period   | Discounting | Total cost of disease per quarter | Total costs discounted | SSI rate reduction (%) | SSI rate reduction to 3% minimum (%) | Quarterly cost of surveillance | Quarterly costs of surveillance discounted | New total costs after reduction SSI | New total cost discounted | Prevented costs | Prevented costs discounted |
|----------|-------------|-----------------------------------|------------------------|------------------------|--------------------------------------|--------------------------------|--------------------------------------------|-------------------------------------|---------------------------|-----------------|----------------------------|
| Baseline | 0           | £5,630                            | £5,630                 | 10.00                  | 10.0                                 | £4,282                         | £4,282                                     | £ 5,629.88                          | £ 5,629.88                | £ -             | £ -                        |
| Year1Q1  | 0.125       | £5,630                            | £5,606                 | 8.00                   | 8.0                                  | £4,282                         | £4,264                                     | £ 4,503.90                          | £ 4,484.57                | £ 1,125.98      | £ 1,121.14                 |
| Year1Q2  | 0.375       | £5,630                            | £5,558                 | 8.00                   | 8.0                                  | £0                             | £0                                         | £ 4,503.90                          | £ 4,446.17                | £ 1,125.98      | £ 1,111.54                 |
| Year1Q3  | 0.625       | £5,630                            | £5,510                 | 6.40                   | 6.4                                  | £4,282                         | £4,191                                     | £ 3,603.12                          | £ 3,526.48                | £ 2,026.76      | £ 1,983.64                 |
| Year1Q4  | 0.875       | £5,630                            | £5,463                 | 6.40                   | 6.4                                  | £0                             | £0                                         | £ 3,603.12                          | £ 3,496.28                | £ 2,026.76      | £ 1,966.66                 |
| Year2Q1  | 1.125       | £5,630                            | £5,416                 | 5.12                   | 5.1                                  | £4,282                         | £4,120                                     | £ 2,882.50                          | £ 2,773.07                | £ 2,747.38      | £ 2,643.08                 |
| Year2Q2  | 1.375       | £5,630                            | £5,370                 | 5.12                   | 5.1                                  | £0                             | £0                                         | £ 2,882.50                          | £ 2,749.32                | £ 2,747.38      | £ 2,620.45                 |
| Year2Q3  | 1.625       | £5,630                            | £5,324                 | 4.10                   | 4.1                                  | £4,282                         | £4,050                                     | £ 2,306.00                          | £ 2,180.62                | £ 3,323.88      | £ 3,143.16                 |
| Year2Q4  | 1.875       | £5,630                            | £5,278                 | 4.10                   | 4.1                                  | £0                             | £0                                         | £ 2,306.00                          | £ 2,161.95                | £ 3,323.88      | £ 3,116.25                 |
| Year3Q1  | 2.125       | £5,630                            | £5,233                 | 4.10                   | 4.1                                  | £0                             | £0                                         | £ 2,306.00                          | £ 2,143.44                | £ 3,323.88      | £ 3,089.56                 |
| Year3Q2  | 2.375       | £5,630                            | £5,188                 | 4.10                   | 4.1                                  | £0                             | £0                                         | £ 2,306.00                          | £ 2,125.08                | £ 3,323.88      | £ 3,063.10                 |
| Year3Q3  | 2.625       | £5,630                            | £5,144                 | 3.28                   | 3.3                                  | £4,282                         | £3,913                                     | £ 1,844.80                          | £ 1,685.51                | £ 3,785.08      | £ 3,458.25                 |
| Year3Q4  | 2.875       | £5,630                            | £5,100                 | 3.28                   | 3.3                                  | £0                             | £0                                         | £ 1,844.80                          | £ 1,671.07                | £ 3,785.08      | £ 3,428.64                 |
| Year4Q1  | 3.125       | £5,630                            | £5,056                 | 3.3                    | 3.3                                  | £0                             | £0                                         | £ 1,844.80                          | £ 1,656.76                | £ 3,785.08      | £ 3,399.27                 |
| Year4Q2  | 3.375       | £5,630                            | £5,013                 | 3.3                    | 3.3                                  | £0                             | £0                                         | £ 1,844.80                          | £ 1,642.57                | £ 3,785.08      | £ 3,370.16                 |
| Year4Q3  | 3.625       | £5,630                            | £4,970                 | 2.6                    | 3.0                                  | £4,282                         | £3,780                                     | £ 1,688.96                          | £ 1,490.94                | £ 3,940.91      | £ 3,478.87                 |
| Year4Q4  | 3.875       | £5,630                            | £4,927                 | 2.6                    | 3.0                                  | £0                             | £0                                         | £ 1,688.96                          | £ 1,478.18                | £ 3,940.91      | £ 3,449.08                 |
| Year5Q1  | 4.125       | £5,630                            | £4,885                 | 2.6                    | 3.0                                  | £0                             | £0                                         | £ 1,688.96                          | £ 1,465.52                | £ 3,940.91      | £ 3,419.54                 |
| Year5Q2  | 4.375       | £5,630                            | £4,843                 | 2.6                    | 3.0                                  | £0                             | £0                                         | £ 1,688.96                          | £ 1,452.97                | £ 3,940.91      | £ 3,390.26                 |
| Year5Q3  | 4.625       | £5,630                            | £4,802                 | 2.1                    | 3.0                                  | £4,282                         | £3,652                                     | £ 1,688.96                          | £ 1,440.53                | £ 3,940.91      | £ 3,361.23                 |
| Year5Q4  | 4.875       | £5,630                            | £4,761                 | 2.1                    | 3.0                                  | £0                             | £0                                         | £ 1,688.96                          | £ 1,428.19                | £ 3,940.91      | £ 3,332.44                 |
| Year6Q1  | 5.125       | £5,630                            | £4,720                 | 2.1                    | 3.0                                  | £0                             | £0                                         | £ 1,688.96                          | £ 1,415.96                | £ 3,940.91      | £ 3,303.90                 |
| Year6Q2  | 5.375       | £5,630                            | £4,679                 | 2.1                    | 3.0                                  | £0                             | £0                                         | £ 1,688.96                          | £ 1,403.83                | £ 3,940.91      | £ 3,275.61                 |
| Year6Q3  | 5.625       | £5,630                            | £4,639                 | 1.7                    | 3.0                                  | £4,282                         | £3,529                                     | £ 1,688.96                          | £ 1,391.81                | £ 3,940.91      | £ 3,247.56                 |
| Year6Q4  | 5.875       | £5,630                            | £4,600                 | 1.7                    | 3.0                                  | £0                             | £0                                         | £ 1,688.96                          | £ 1,379.89                | £ 3,940.91      | £ 3,219.75                 |
| Year7Q1  | 6.125       | £5,630                            | £4,560                 | 1.7                    | 3.0                                  | £0                             | £0                                         | £ 1,688.96                          | £ 1,368.08                | £ 3,940.91      | £ 3,192.18                 |
| Year7Q2  | 6.375       | £5,630                            | £4,521                 | 1.7                    | 3.0                                  | £0                             | £0                                         | £ 1,688.96                          | £ 1,356.36                | £ 3,940.91      | £ 3,164.84                 |
| Year7Q3  | 6.625       | £5,630                            | £4,482                 | 1.3                    | 3.0                                  | £4,282                         | £3,410                                     | £ 1,688.96                          | £ 1,344.75                | £ 3,940.91      | £ 3,137.74                 |
| Year7Q4  | 6.875       | £5,630                            | £4,444                 | 1.3                    | 3.0                                  | £0                             | £0                                         | £ 1,688.96                          | £ 1,333.23                | £ 3,940.91      | £ 3,110.87                 |

|    |          |        |        |        |     |     |        |        |   |          |   |          |   |          |   |          |
|----|----------|--------|--------|--------|-----|-----|--------|--------|---|----------|---|----------|---|----------|---|----------|
| 1  |          |        |        |        |     |     |        |        |   |          |   |          |   |          |   |          |
| 2  | Year8Q1  | 7.125  | £5,630 | £4,406 | 1.3 | 3.0 | £0     | £0     | £ | 1,688.96 | £ | 1,321.81 | £ | 3,940.91 | £ | 3,084.23 |
| 3  | Year8Q2  | 7.375  | £5,630 | £4,368 | 1.3 | 3.0 | £0     | £0     | £ | 1,688.96 | £ | 1,310.49 | £ | 3,940.91 | £ | 3,057.82 |
| 4  | Year8Q3  | 7.625  | £5,630 | £4,331 | 1.1 | 3.0 | £4,282 | £3,294 | £ | 1,688.96 | £ | 1,299.27 | £ | 3,940.91 | £ | 3,031.63 |
| 5  | Year8Q4  | 7.875  | £5,630 | £4,294 | 1.1 | 3.0 | £0     | £0     | £ | 1,688.96 | £ | 1,288.15 | £ | 3,940.91 | £ | 3,005.67 |
| 6  | Year9Q1  | 8.125  | £5,630 | £4,257 | 1.1 | 3.0 | £0     | £0     | £ | 1,688.96 | £ | 1,277.11 | £ | 3,940.91 | £ | 2,979.93 |
| 7  | Year9Q2  | 8.375  | £5,630 | £4,221 | 1.1 | 3.0 | £0     | £0     | £ | 1,688.96 | £ | 1,266.18 | £ | 3,940.91 | £ | 2,954.41 |
| 8  | Year9Q3  | 8.625  | £5,630 | £4,184 | 0.9 | 3.0 | £4,282 | £3,183 | £ | 1,688.96 | £ | 1,255.33 | £ | 3,940.91 | £ | 2,929.11 |
| 9  | Year9Q4  | 8.875  | £5,630 | £4,149 | 0.9 | 3.0 | £0     | £0     | £ | 1,688.96 | £ | 1,244.58 | £ | 3,940.91 | £ | 2,904.03 |
| 10 | Year10Q1 | 9.125  | £5,630 | £4,113 | 0.9 | 3.0 | £0     | £0     | £ | 1,688.96 | £ | 1,233.93 | £ | 3,940.91 | £ | 2,879.16 |
| 11 | Year10Q2 | 9.375  | £5,630 | £4,078 | 0.9 | 3.0 | £0     | £0     | £ | 1,688.96 | £ | 1,223.36 | £ | 3,940.91 | £ | 2,854.51 |
| 12 | Year10Q3 | 9.625  | £5,630 | £4,043 | 0.7 | 3.0 | £4,282 | £3,075 | £ | 1,688.96 | £ | 1,212.88 | £ | 3,940.91 | £ | 2,830.06 |
| 13 | Year10Q4 | 9.875  | £5,630 | £4,008 | 0.7 | 3.0 | £0     | £0     | £ | 1,688.96 | £ | 1,202.50 | £ | 3,940.91 | £ | 2,805.83 |
| 14 | Year11Q1 | 10.125 | £5,630 | £3,974 | 0.7 | 3.0 | £0     | £0     | £ | 1,688.96 | £ | 1,192.20 | £ | 3,940.91 | £ | 2,781.80 |
| 15 | Year11Q2 | 10.375 | £5,630 | £3,940 | 0.7 | 3.0 | £0     | £0     | £ | 1,688.96 | £ | 1,181.99 | £ | 3,940.91 | £ | 2,757.98 |
| 16 | Year11Q3 | 10.625 | £5,630 | £3,906 | 0.5 | 3.0 | £4,282 | £2,971 | £ | 1,688.96 | £ | 1,171.87 | £ | 3,940.91 | £ | 2,734.36 |
| 17 | Year11Q4 | 10.875 | £5,630 | £3,873 | 0.5 | 3.0 | £0     | £0     | £ | 1,688.96 | £ | 1,161.83 | £ | 3,940.91 | £ | 2,710.94 |
| 18 | Year12Q1 | 11.125 | £5,630 | £3,840 | 0.5 | 3.0 | £0     | £0     | £ | 1,688.96 | £ | 1,151.88 | £ | 3,940.91 | £ | 2,687.73 |
| 19 | Year12Q2 | 11.375 | £5,630 | £3,807 | 0.5 | 3.0 | £0     | £0     | £ | 1,688.96 | £ | 1,142.02 | £ | 3,940.91 | £ | 2,664.71 |
| 20 | Year12Q3 | 11.625 | £5,630 | £3,774 | 0.4 | 3.0 | £4,282 | £2,871 | £ | 1,688.96 | £ | 1,132.24 | £ | 3,940.91 | £ | 2,641.89 |
| 21 | Year12Q4 | 11.875 | £5,630 | £3,742 | 0.4 | 3.0 | £0     | £0     | £ | 1,688.96 | £ | 1,122.54 | £ | 3,940.91 | £ | 2,619.27 |
| 22 | Year13Q1 | 12.125 | £5,630 | £3,710 | 0.4 | 3.0 | £0     | £0     | £ | 1,688.96 | £ | 1,112.93 | £ | 3,940.91 | £ | 2,596.84 |
| 23 | Year13Q2 | 12.375 | £5,630 | £3,678 | 0.4 | 3.0 | £0     | £0     | £ | 1,688.96 | £ | 1,103.40 | £ | 3,940.91 | £ | 2,574.60 |
| 24 | Year13Q3 | 12.625 | £5,630 | £3,647 | 0.4 | 3.0 | £4,282 | £2,774 | £ | 1,688.96 | £ | 1,093.95 | £ | 3,940.91 | £ | 2,552.55 |
| 25 | Year13Q4 | 12.875 | £5,630 | £3,615 | 0.4 | 3.0 | £0     | £0     | £ | 1,688.96 | £ | 1,084.58 | £ | 3,940.91 | £ | 2,530.69 |
| 26 | Year14Q1 | 13.125 | £5,630 | £3,584 | 0.4 | 3.0 | £0     | £0     | £ | 1,688.96 | £ | 1,075.30 | £ | 3,940.91 | £ | 2,509.02 |
| 27 | Year14Q2 | 13.375 | £5,630 | £3,554 | 0.4 | 3.0 | £0     | £0     | £ | 1,688.96 | £ | 1,066.09 | £ | 3,940.91 | £ | 2,487.54 |
| 28 | Year14Q3 | 13.625 | £5,630 | £3,523 | 0.3 | 3.0 | £4,282 | £2,680 | £ | 1,688.96 | £ | 1,056.96 | £ | 3,940.91 | £ | 2,466.24 |
| 29 | Year14Q4 | 13.875 | £5,630 | £3,493 | 0.3 | 3.0 | £0     | £0     | £ | 1,688.96 | £ | 1,047.91 | £ | 3,940.91 | £ | 2,445.12 |
| 30 | Year15Q1 | 14.125 | £5,630 | £3,463 | 0.3 | 3.0 | £0     | £0     | £ | 1,688.96 | £ | 1,038.93 | £ | 3,940.91 | £ | 2,424.18 |
| 31 | Year15Q2 | 14.375 | £5,630 | £3,433 | 0.3 | 3.0 | £0     | £0     | £ | 1,688.96 | £ | 1,030.04 | £ | 3,940.91 | £ | 2,403.42 |
| 32 | Year15Q3 | 14.625 | £5,630 | £3,404 | 0.2 | 3.0 | £4,282 | £2,589 | £ | 1,688.96 | £ | 1,021.22 | £ | 3,940.91 | £ | 2,382.84 |
| 33 | Year15Q4 | 14.875 | £5,630 | £3,375 | 0.2 | 3.0 | £0     | £0     | £ | 1,688.96 | £ | 1,012.47 | £ | 3,940.91 | £ | 2,362.43 |
| 34 | Year16Q1 | 15.125 | £5,630 | £3,346 | 0.2 | 3.0 | £0     | £0     | £ | 1,688.96 | £ | 1,003.80 | £ | 3,940.91 | £ | 2,342.20 |
| 35 | Year16Q2 | 15.375 | £5,630 | £3,317 | 0.2 | 3.0 | £0     | £0     | £ | 1,688.96 | £ | 995.20   | £ | 3,940.91 | £ | 2,322.14 |
| 36 | Year16Q3 | 15.625 | £5,630 | £3,289 | 0.2 | 3.0 | £4,282 | £2,502 | £ | 1,688.96 | £ | 986.68   | £ | 3,940.91 | £ | 2,302.26 |
| 37 | Year16Q4 | 15.875 | £5,630 | £3,261 | 0.2 | 3.0 | £0     | £0     | £ | 1,688.96 | £ | 978.23   | £ | 3,940.91 | £ | 2,282.54 |
| 38 | Year17Q1 | 16.125 | £5,630 | £3,233 | 0.2 | 3.0 | £0     | £0     | £ | 1,688.96 | £ | 969.86   | £ | 3,940.91 | £ | 2,263.00 |
| 39 | Year17Q2 | 16.375 | £5,630 | £3,205 | 0.2 | 3.0 | £0     | £0     | £ | 1,688.96 | £ | 961.55   | £ | 3,940.91 | £ | 2,243.62 |
| 40 | Year17Q3 | 16.625 | £5,630 | £3,178 | 0.1 | 3.0 | £4,282 | £2,417 | £ | 1,688.96 | £ | 953.32   | £ | 3,940.91 | £ | 2,224.40 |
| 41 | Year17Q4 | 16.875 | £5,630 | £3,151 | 0.1 | 3.0 | £0     | £0     | £ | 1,688.96 | £ | 945.15   | £ | 3,940.91 | £ | 2,205.35 |
| 42 | Year18Q1 | 17.125 | £5,630 | £3,124 | 0.1 | 3.0 | £0     | £0     | £ | 1,688.96 | £ | 937.06   | £ | 3,940.91 | £ | 2,186.47 |
| 43 | Year18Q2 | 17.375 | £5,630 | £3,097 | 0.1 | 3.0 | £0     | £0     | £ | 1,688.96 | £ | 929.03   | £ | 3,940.91 | £ | 2,167.75 |
| 44 | Year18Q3 | 17.625 | £5,630 | £3,070 | 0.1 | 3.0 | £4,282 | £2,335 | £ | 1,688.96 | £ | 921.08   | £ | 3,940.91 | £ | 2,149.18 |
| 45 | Year18Q4 | 17.875 | £5,630 | £3,044 | 0.1 | 3.0 | £0     | £0     | £ | 1,688.96 | £ | 913.19   | £ | 3,940.91 | £ | 2,130.78 |





|    |          |   |        |   |        |   |         |   |         |    |        |      |        |        |
|----|----------|---|--------|---|--------|---|---------|---|---------|----|--------|------|--------|--------|
| 1  |          |   |        |   |        |   |         |   |         |    |        |      |        |        |
| 2  | Year3Q1  | £ | 21,412 | £ | 20,907 | £ | 21,772  | £ | 20,795  | £  | 111    | 1.01 | 3.125  | 999    |
| 3  | Year3Q2  | £ | 21,412 | £ | 20,907 | £ | 25,096  | £ | 23,859  | -£ | 2,952  | 0.88 | 3.375  | 3.375  |
| 4  | Year3Q3  | £ | 25,694 | £ | 24,819 | £ | 28,881  | £ | 27,317  | -£ | 2,497  | 0.91 | 3.625  | 3.625  |
| 5  | Year3Q4  | £ | 25,694 | £ | 24,819 | £ | 32,666  | £ | 30,745  | -£ | 5,926  | 0.81 | 3.875  | 3.875  |
| 6  | Year4Q1  | £ | 25,694 | £ | 24,819 | £ | 36,451  | £ | 34,145  | -£ | 9,325  | 0.73 | 4.125  | 4.125  |
| 7  | Year4Q2  | £ | 25,694 | £ | 24,819 | £ | 40,236  | £ | 37,515  | -£ | 12,695 | 0.66 | 4.375  | 4.375  |
| 8  | Year4Q3  | £ | 29,976 | £ | 28,600 | £ | 44,177  | £ | 40,994  | -£ | 12,394 | 0.70 | 4.625  | 4.625  |
| 9  | Year4Q4  | £ | 29,976 | £ | 28,600 | £ | 48,118  | £ | 44,443  | -£ | 15,843 | 0.64 | 4.875  | 4.875  |
| 10 | Year5Q1  | £ | 29,976 | £ | 28,600 | £ | 52,059  | £ | 47,862  | -£ | 19,263 | 0.60 | 5.125  | 5.125  |
| 11 | Year5Q2  | £ | 29,976 | £ | 28,600 | £ | 56,000  | £ | 51,253  | -£ | 22,653 | 0.56 | 5.375  | 5.375  |
| 12 | Year5Q3  | £ | 34,259 | £ | 32,252 | £ | 59,941  | £ | 54,614  | -£ | 22,362 | 0.59 | 5.625  | 5.625  |
| 13 | Year5Q4  | £ | 34,259 | £ | 32,252 | £ | 63,882  | £ | 57,946  | -£ | 25,694 | 0.56 | 5.875  | 5.875  |
| 14 | Year6Q1  | £ | 34,259 | £ | 32,252 | £ | 67,822  | £ | 61,250  | -£ | 28,998 | 0.53 | 6.125  | 6.125  |
| 15 | Year6Q2  | £ | 34,259 | £ | 32,252 | £ | 71,763  | £ | 64,526  | -£ | 32,274 | 0.50 | 6.375  | 6.375  |
| 16 | Year6Q3  | £ | 38,541 | £ | 35,781 | £ | 75,704  | £ | 67,773  | -£ | 31,992 | 0.53 | 6.625  | 6.625  |
| 17 | Year6Q4  | £ | 38,541 | £ | 35,781 | £ | 79,645  | £ | 70,993  | -£ | 35,212 | 0.50 | 6.875  | 6.875  |
| 18 | Year7Q1  | £ | 38,541 | £ | 35,781 | £ | 83,586  | £ | 74,185  | -£ | 38,404 | 0.48 | 7.125  | 7.125  |
| 19 | Year7Q2  | £ | 38,541 | £ | 35,781 | £ | 87,527  | £ | 77,350  | -£ | 41,569 | 0.46 | 7.375  | 7.375  |
| 20 | Year7Q3  | £ | 42,824 | £ | 39,191 | £ | 91,468  | £ | 80,488  | -£ | 41,297 | 0.49 | 7.625  | 7.625  |
| 21 | Year7Q4  | £ | 42,824 | £ | 39,191 | £ | 95,409  | £ | 83,599  | -£ | 44,408 | 0.47 | 7.875  | 7.875  |
| 22 | Year8Q1  | £ | 42,824 | £ | 39,191 | £ | 99,350  | £ | 86,683  | -£ | 47,492 | 0.45 | 8.125  | 8.125  |
| 23 | Year8Q2  | £ | 42,824 | £ | 39,191 | £ | 103,291 | £ | 89,741  | -£ | 50,550 | 0.44 | 8.375  | 8.375  |
| 24 | Year8Q3  | £ | 47,106 | £ | 42,485 | £ | 107,232 | £ | 92,772  | -£ | 50,287 | 0.46 | 8.625  | 8.625  |
| 25 | Year8Q4  | £ | 47,106 | £ | 42,485 | £ | 111,172 | £ | 95,778  | -£ | 53,293 | 0.44 | 8.875  | 8.875  |
| 26 | Year9Q1  | £ | 47,106 | £ | 42,485 | £ | 115,113 | £ | 98,758  | -£ | 56,273 | 0.43 | 9.125  | 9.125  |
| 27 | Year9Q2  | £ | 47,106 | £ | 42,485 | £ | 119,054 | £ | 101,712 | -£ | 59,227 | 0.42 | 9.375  | 9.375  |
| 28 | Year9Q3  | £ | 51,388 | £ | 45,668 | £ | 122,995 | £ | 104,642 | -£ | 58,974 | 0.44 | 9.625  | 9.625  |
| 29 | Year9Q4  | £ | 51,388 | £ | 45,668 | £ | 126,936 | £ | 107,546 | -£ | 61,878 | 0.42 | 9.875  | 9.875  |
| 30 | Year10Q1 | £ | 51,388 | £ | 45,668 | £ | 130,877 | £ | 110,425 | -£ | 64,757 | 0.41 | 10.125 | 10.125 |
| 31 | Year10Q2 | £ | 51,388 | £ | 45,668 | £ | 134,818 | £ | 113,279 | -£ | 67,611 | 0.40 | 10.375 | 10.375 |
| 32 | Year10Q3 | £ | 55,671 | £ | 48,743 | £ | 138,759 | £ | 116,109 | -£ | 67,366 | 0.42 | 10.625 | 10.625 |
| 33 | Year10Q4 | £ | 55,671 | £ | 48,743 | £ | 142,700 | £ | 118,915 | -£ | 70,172 | 0.41 | 10.875 | 10.875 |
| 34 | Year11Q1 | £ | 55,671 | £ | 48,743 | £ | 146,641 | £ | 121,697 | -£ | 72,954 | 0.40 | 11.125 | 11.125 |
| 35 | Year11Q2 | £ | 55,671 | £ | 48,743 | £ | 150,582 | £ | 124,455 | -£ | 75,712 | 0.39 | 11.375 | 11.375 |
| 36 | Year11Q3 | £ | 59,953 | £ | 51,714 | £ | 154,523 | £ | 127,189 | -£ | 75,475 | 0.41 | 11.625 | 11.625 |
| 37 | Year11Q4 | £ | 59,953 | £ | 51,714 | £ | 158,463 | £ | 129,900 | -£ | 78,186 | 0.40 | 11.875 | 11.875 |
| 38 | Year12Q1 | £ | 59,953 | £ | 51,714 | £ | 162,404 | £ | 132,588 | -£ | 80,874 | 0.39 | 12.125 | 12.125 |
| 39 | Year12Q2 | £ | 59,953 | £ | 51,714 | £ | 166,345 | £ | 135,253 | -£ | 83,538 | 0.38 | 12.375 | 12.375 |
| 40 | Year12Q3 | £ | 64,235 | £ | 54,585 | £ | 170,286 | £ | 137,895 | -£ | 83,309 | 0.40 | 12.625 | 12.625 |
| 41 | Year12Q4 | £ | 64,235 | £ | 54,585 | £ | 174,227 | £ | 140,514 | -£ | 85,929 | 0.39 | 12.875 | 12.875 |
| 42 | Year13Q1 | £ | 64,235 | £ | 54,585 | £ | 178,168 | £ | 143,111 | -£ | 88,526 | 0.38 | 13.125 | 13.125 |
| 43 | Year13Q2 | £ | 64,235 | £ | 54,585 | £ | 182,109 | £ | 145,685 | -£ | 91,100 | 0.37 | 13.375 | 13.375 |
| 44 | Year13Q3 | £ | 68,518 | £ | 57,359 | £ | 186,050 | £ | 148,238 | -£ | 90,879 | 0.39 | 13.625 | 13.625 |
| 45 | Year13Q4 | £ | 68,518 | £ | 57,359 | £ | 189,991 | £ | 150,769 | -£ | 93,410 | 0.38 | 13.875 | 13.875 |
| 46 |          |   |        |   |        |   |         |   |         |    |        |      |        |        |

|    |          |   |         |   |        |   |         |   |         |    |         |      |        |        |
|----|----------|---|---------|---|--------|---|---------|---|---------|----|---------|------|--------|--------|
| 1  |          |   |         |   |        |   |         |   |         |    |         |      |        |        |
| 2  | Year14Q1 | £ | 68,518  | £ | 57,359 | £ | 193,932 | £ | 153,278 | -£ | 95,919  | 0.37 | 14.125 | 14.125 |
| 3  | Year14Q2 | £ | 68,518  | £ | 57,359 | £ | 197,873 | £ | 155,765 | -£ | 98,406  | 0.37 | 14.375 | 14.375 |
| 4  | Year14Q3 | £ | 72,800  | £ | 60,039 | £ | 201,813 | £ | 158,231 | -£ | 98,193  | 0.38 | 14.625 | 14.625 |
| 5  | Year14Q4 | £ | 72,800  | £ | 60,039 | £ | 205,754 | £ | 160,676 | -£ | 100,638 | 0.37 | 14.875 | 14.875 |
| 6  | Year15Q1 | £ | 72,800  | £ | 60,039 | £ | 209,695 | £ | 163,101 | -£ | 103,062 | 0.37 | 15.125 | 15.125 |
| 7  | Year15Q2 | £ | 72,800  | £ | 60,039 | £ | 213,636 | £ | 165,504 | -£ | 105,465 | 0.36 | 15.375 | 15.375 |
| 8  | Year15Q3 | £ | 77,082  | £ | 62,628 | £ | 217,577 | £ | 167,887 | -£ | 105,259 | 0.37 | 15.625 | 15.625 |
| 9  | Year15Q4 | £ | 77,082  | £ | 62,628 | £ | 221,518 | £ | 170,249 | -£ | 107,621 | 0.37 | 15.875 | 15.875 |
| 10 | Year16Q1 | £ | 77,082  | £ | 62,628 | £ | 225,459 | £ | 172,592 | -£ | 109,963 | 0.36 | 16.125 | 16.125 |
| 11 | Year16Q2 | £ | 77,082  | £ | 62,628 | £ | 229,400 | £ | 174,914 | -£ | 112,286 | 0.36 | 16.375 | 16.375 |
| 12 | Year16Q3 | £ | 81,365  | £ | 65,130 | £ | 233,341 | £ | 177,216 | -£ | 112,086 | 0.37 | 16.625 | 16.625 |
| 13 | Year16Q4 | £ | 81,365  | £ | 65,130 | £ | 237,282 | £ | 179,498 | -£ | 114,369 | 0.36 | 16.875 | 16.875 |
| 14 | Year17Q1 | £ | 81,365  | £ | 65,130 | £ | 241,223 | £ | 181,761 | -£ | 116,632 | 0.36 | 17.125 | 17.125 |
| 15 | Year17Q2 | £ | 81,365  | £ | 65,130 | £ | 245,163 | £ | 184,005 | -£ | 118,875 | 0.35 | 17.375 | 17.375 |
| 16 | Year17Q3 | £ | 85,647  | £ | 67,547 | £ | 249,104 | £ | 186,229 | -£ | 118,683 | 0.36 | 17.625 | 17.625 |
| 17 | Year17Q4 | £ | 85,647  | £ | 67,547 | £ | 253,045 | £ | 188,435 | -£ | 120,888 | 0.36 | 17.875 | 17.875 |
| 18 | Year18Q1 | £ | 85,647  | £ | 67,547 | £ | 256,986 | £ | 190,621 | -£ | 123,074 | 0.35 | 18.125 | 18.125 |
| 19 | Year18Q2 | £ | 85,647  | £ | 67,547 | £ | 260,927 | £ | 192,789 | -£ | 125,242 | 0.35 | 18.375 | 18.375 |
| 20 | Year18Q3 | £ | 89,929  | £ | 69,882 | £ | 264,868 | £ | 194,938 | -£ | 125,056 | 0.36 | 18.625 | 18.625 |
| 21 | Year18Q4 | £ | 89,929  | £ | 69,882 | £ | 268,809 | £ | 197,069 | -£ | 127,187 | 0.35 | 18.875 | 18.875 |
| 22 | Year19Q1 | £ | 89,929  | £ | 69,882 | £ | 272,750 | £ | 199,182 | -£ | 129,299 | 0.35 | 19.125 | 19.125 |
| 23 | Year19Q2 | £ | 89,929  | £ | 69,882 | £ | 276,691 | £ | 201,276 | -£ | 131,394 | 0.35 | 19.375 | 19.375 |
| 24 | Year19Q3 | £ | 94,212  | £ | 72,139 | £ | 280,632 | £ | 203,352 | -£ | 131,214 | 0.35 | 19.625 | 19.625 |
| 25 | Year19Q4 | £ | 94,212  | £ | 72,139 | £ | 284,573 | £ | 205,411 | -£ | 133,272 | 0.35 | 19.875 | 19.875 |
| 26 | Year20Q1 | £ | 94,212  | £ | 72,139 | £ | 288,514 | £ | 207,452 | -£ | 135,314 | 0.35 | 20.125 | 20.125 |
| 27 | Year20Q2 | £ | 94,212  | £ | 72,139 | £ | 292,454 | £ | 209,476 | -£ | 137,337 | 0.34 | 20.375 | 20.375 |
| 28 | Year20Q3 | £ | 98,494  | £ | 74,319 | £ | 296,395 | £ | 211,482 | -£ | 137,163 | 0.35 | 20.625 | 20.625 |
| 29 | Year20Q4 | £ | 98,494  | £ | 74,319 | £ | 300,336 | £ | 213,471 | -£ | 139,152 | 0.35 | 20.875 | 20.875 |
| 30 | Year21Q1 | £ | 98,494  | £ | 74,319 | £ | 304,277 | £ | 215,443 | -£ | 141,125 | 0.34 | 21.125 | 21.125 |
| 31 | Year21Q2 | £ | 98,494  | £ | 74,319 | £ | 308,218 | £ | 217,399 | -£ | 143,080 | 0.34 | 21.375 | 21.375 |
| 32 | Year21Q3 | £ | 102,776 | £ | 76,425 | £ | 312,159 | £ | 219,337 | -£ | 142,912 | 0.35 | 21.625 | 21.625 |
| 33 | Year21Q4 | £ | 102,776 | £ | 76,425 | £ | 316,100 | £ | 221,259 | -£ | 144,834 | 0.35 | 21.875 | 21.875 |
| 34 | Year22Q1 | £ | 102,776 | £ | 76,425 | £ | 320,041 | £ | 223,164 | -£ | 146,739 | 0.34 | 22.125 | 22.125 |
| 35 | Year22Q2 | £ | 102,776 | £ | 76,425 | £ | 323,982 | £ | 225,053 | -£ | 148,628 | 0.34 | 22.375 | 22.375 |
| 36 | Year22Q3 | £ | 107,059 | £ | 78,460 | £ | 327,923 | £ | 226,926 | -£ | 148,466 | 0.35 | 22.625 | 22.625 |
| 37 | Year22Q4 | £ | 107,059 | £ | 78,460 | £ | 331,864 | £ | 228,783 | -£ | 150,323 | 0.34 | 22.875 | 22.875 |
| 38 | Year23Q1 | £ | 107,059 | £ | 78,460 | £ | 335,804 | £ | 230,624 | -£ | 152,164 | 0.34 | 23.125 | 23.125 |
| 39 | Year23Q2 | £ | 107,059 | £ | 78,460 | £ | 339,745 | £ | 232,449 | -£ | 153,989 | 0.34 | 23.375 | 23.375 |
| 40 | Year23Q3 | £ | 111,341 | £ | 80,427 | £ | 343,686 | £ | 234,259 | -£ | 153,832 | 0.34 | 23.625 | 23.625 |
| 41 | Year23Q4 | £ | 111,341 | £ | 80,427 | £ | 347,627 | £ | 236,053 | -£ | 155,626 | 0.34 | 23.875 | 23.875 |
| 42 | Year24Q1 | £ | 111,341 | £ | 80,427 | £ | 351,568 | £ | 237,831 | -£ | 157,405 | 0.34 | 24.125 | 24.125 |
| 43 | Year24Q2 | £ | 111,341 | £ | 80,427 | £ | 355,509 | £ | 239,595 | -£ | 159,168 | 0.34 | 24.375 | 24.375 |
| 44 | Year24Q3 | £ | 115,623 | £ | 82,327 | £ | 359,450 | £ | 241,343 | -£ | 159,017 | 0.34 | 24.625 | 24.625 |
| 45 | Year24Q4 | £ | 115,623 | £ | 82,327 | £ | 363,391 | £ | 243,077 | -£ | 160,750 | 0.34 | 24.875 | 24.875 |
| 46 |          |   |         |   |        |   |         |   |         |    |         |      |        |        |

1  
2  
3  
4  
5  
6  
7  
8  
9  
10  
11  
12  
13  
14  
15  
16  
17  
18  
19  
20  
21  
22  
23  
24  
25  
26  
27  
28  
29  
30  
31  
32  
33  
34  
35  
36  
37  
38  
39  
40  
41  
42  
43  
44  
45  
46

|          |   |         |   |        |   |         |   |         |    |         |      |        |        |
|----------|---|---------|---|--------|---|---------|---|---------|----|---------|------|--------|--------|
| Year25Q1 | £ | 115,623 | £ | 82,327 | £ | 367,332 | £ | 244,795 | -£ | 162,469 | 0.34 | 25.125 | 25.125 |
| Year25Q2 | £ | 115,623 | £ | 82,327 | £ | 371,273 | £ | 246,499 | -£ | 164,172 | 0.33 | 25.375 | 25.375 |
| Year25Q3 | £ | 119,906 | £ | 84,162 | £ | 375,214 | £ | 248,188 | -£ | 164,026 | 0.34 | 25.625 | 25.625 |
| Year25Q4 | £ | 119,906 | £ | 84,162 | £ | 379,155 | £ | 249,863 | -£ | 165,701 | 0.34 | 25.875 | 25.875 |

For peer review only

# CHEERS Checklist

| Section/topic                                          | #   | Recommendation                                                                                                                                                                             | Reported on page # |
|--------------------------------------------------------|-----|--------------------------------------------------------------------------------------------------------------------------------------------------------------------------------------------|--------------------|
| <b>TITLE AND ABSTRACT</b>                              |     |                                                                                                                                                                                            |                    |
| Title                                                  | 1   | Identify the study as an economic evaluation or use more specific terms such as “cost-effectiveness analysis”, and describe the interventions compared.                                    | 1                  |
| Abstract                                               | 2   | Provide a structured summary of objectives, perspective, setting, methods (including study design and inputs), results (including base case and uncertainty analyses), and conclusions.    | 3 - 4              |
| <b>INTRODUCTION</b>                                    |     |                                                                                                                                                                                            |                    |
| Background and objectives                              | 3   | Provide an explicit statement of the broader context for the study.<br>Present the study question and its relevance for health policy or practice decisions.                               | 5 - 6              |
| <b>METHODS</b>                                         |     |                                                                                                                                                                                            |                    |
| Target population and subgroups                        | 4   | Describe characteristics of the base case population and subgroups analysed, including why they were chosen.                                                                               | 6 - 7              |
| Setting and location                                   | 5   | State relevant aspects of the system(s) in which the decision(s) need(s) to be made.                                                                                                       | 6 - 7              |
| Study perspective                                      | 6   | Describe the perspective of the study and relate this to the costs being evaluated.                                                                                                        | 10                 |
| Comparators                                            | 7   | Describe the interventions or strategies being compared and state why they were chosen.                                                                                                    | 10 - 11            |
| Time horizon                                           | 8   | State the time horizon(s) over which costs and consequences are being evaluated and say why appropriate.                                                                                   | 10                 |
| Discount rate                                          | 9   | Report the choice of discount rate(s) used for costs and outcomes and say why appropriate.                                                                                                 | 10                 |
| Choice of health outcomes                              | 10  | Describe what outcomes were used as the measure(s) of benefit in the evaluation and their relevance for the type of analysis performed.                                                    | 10-11              |
| Measurement of effectiveness                           | 11a | <i>Single study-based estimates</i> : Describe fully the design features of the single effectiveness study and why the single study was a sufficient source of clinical effectiveness data |                    |
|                                                        | 11b | <i>Synthesis-based estimates</i> : Describe fully the methods used for identification of included studies and synthesis of clinical effectiveness data.                                    | 7 - 10             |
| Measurement and valuation of preference based outcomes | 12  | If applicable, describe the population and methods used to elicit preferences for outcomes                                                                                                 | NA                 |

# CHEERS Checklist

| Section/topic                        | #   | Checklist item                                                                                                                                                                                                                                                                                                                                        | Reported on page #        |
|--------------------------------------|-----|-------------------------------------------------------------------------------------------------------------------------------------------------------------------------------------------------------------------------------------------------------------------------------------------------------------------------------------------------------|---------------------------|
| Estimating resources and costs       | 13a | <i>Single study-based economic evaluation:</i> Describe approaches used to estimate resource use associated with the alternative interventions. Describe primary or secondary research methods for valuing each resource item in terms of its unit cost. Describe any adjustments made to approximate to opportunity costs.                           | NA                        |
|                                      | 13b | <i>Model-based economic evaluation:</i> Describe approaches and data sources used to estimate resource use associated with model health states. Describe primary or secondary research methods for valuing each resource item in terms of its unit cost. Describe any adjustments made to approximate to opportunity costs.                           | 7 - 10                    |
| Currency, price date, and conversion | 14  | Report the dates of the estimated resource quantities and unit costs. Describe methods for adjusting estimated unit costs to the year of reported costs if necessary. Describe methods for converting costs into a common currency base and the exchange rate.                                                                                        | 8 - 9                     |
| Choice of model                      | 15  | Describe and give reasons for the specific type of decision-analytical model used. Providing a figure to show model structure is strongly recommended.                                                                                                                                                                                                | 9 - 10                    |
| Assumptions                          | 16  | Describe all structural or other assumptions underpinning the decision-analytical model.                                                                                                                                                                                                                                                              | 10 - 11                   |
| Analytical models                    | 17  | Describe all analytical methods supporting the evaluation. This could include methods for dealing with skewed, missing, or censored data; extrapolation methods; methods for pooling data; approaches to validate or make adjustments (such as half cycle corrections) to a model; and methods for handling population heterogeneity and uncertainty. | 7 - 11                    |
| <b>RESULTS</b>                       |     |                                                                                                                                                                                                                                                                                                                                                       |                           |
| Study parameters                     | 18  | Report the values, ranges, references, and, if used, probability distributions for all parameters/ Report reasons or sources for distributions used to represent uncertainty where appropriate. Providing a table to show the input values is strongly recommended.                                                                                   | 12 – 14<br>Tables 1, 2, 3 |
| Incremental costs and outcomes       | 19  | For each intervention, report mean values for the main categories of estimated costs and outcomes of interest, as well as mean differences between the comparator groups. If applicable, report incremental cost-effectiveness ratios.                                                                                                                | 17 - 18                   |
| Characterising uncertainty           | 20a | <i>Single study-based economic evaluation:</i> Describe the effects of sampling uncertainty for the estimated incremental cost and incremental effectiveness parameters, together with the impact of methodological assumptions (such as discount rate, study perspective).                                                                           | NA                        |
|                                      | 20b | <i>Model-based economic evaluation:</i> Describe the effects on the results of uncertainty for all input parameters, and uncertainty related to the structure of the model and assumptions.                                                                                                                                                           | 13                        |
| Characterising heterogeneity         | 21  | If applicable, report differences in costs, outcomes, or cost-effectiveness that can be explained by variations between subgroups of patients with different baseline characteristics or other observed variability in effects that are not reducible by more information.                                                                            | NA                        |
| Section/topic                        | #   | Checklist item                                                                                                                                                                                                                                                                                                                                        | Reported on page #        |
| <b>DISCUSSION</b>                    |     |                                                                                                                                                                                                                                                                                                                                                       |                           |

# CHEERS Checklist

1  
2  
3  
4  
5  
6  
7  
8  
9  
10  
11  
12  
13  
14  
15  
16  
17  
18  
19  
20  
21  
22  
23  
24  
25  
26  
27  
28  
29  
30  
31  
32  
33  
34  
35  
36  
37  
38  
39  
40  
41  
42  
43  
44  
45  
46  
47

|                                                                      |    |                                                                                                                                                                                                                                                   |         |
|----------------------------------------------------------------------|----|---------------------------------------------------------------------------------------------------------------------------------------------------------------------------------------------------------------------------------------------------|---------|
| Study findings, limitations, generalisability, and current knowledge | 22 | Summarise key study findings and describe how they support the conclusions reached. Discuss limitations and the generalisability of the findings and how the findings fit with current knowledge.                                                 | 19 – 26 |
| <b>Other</b>                                                         |    |                                                                                                                                                                                                                                                   |         |
| Source of funding                                                    | 23 | Describe how the study was funded and the role of the funder in the identification, design, conduct, and reporting of the analysis. Describe other non-monetary sources of support.                                                               | 27      |
| Conflicts of interest                                                | 24 | Describe any potential for conflict of interest of study contributors in accordance with journal policy. In the absence of a journal policy, we recommend authors comply with International Committee of Medical Journal Editors recommendations. | 27      |

# BMJ Open

## Cost-benefit analysis of surveillance for surgical site infection following caesarean section

|                                 |                                                                                                                                                                                                                                                                                                                                                                                                                                                                                                                                                                                                                                                                                             |
|---------------------------------|---------------------------------------------------------------------------------------------------------------------------------------------------------------------------------------------------------------------------------------------------------------------------------------------------------------------------------------------------------------------------------------------------------------------------------------------------------------------------------------------------------------------------------------------------------------------------------------------------------------------------------------------------------------------------------------------|
| Journal:                        | <i>BMJ Open</i>                                                                                                                                                                                                                                                                                                                                                                                                                                                                                                                                                                                                                                                                             |
| Manuscript ID                   | bmjopen-2020-036919.R2                                                                                                                                                                                                                                                                                                                                                                                                                                                                                                                                                                                                                                                                      |
| Article Type:                   | Original research                                                                                                                                                                                                                                                                                                                                                                                                                                                                                                                                                                                                                                                                           |
| Date Submitted by the Author:   | 05-May-2020                                                                                                                                                                                                                                                                                                                                                                                                                                                                                                                                                                                                                                                                                 |
| Complete List of Authors:       | Wloch, Catherine; Public Health England, Healthcare Associated Infection and Antimicrobial Resistance Division<br>Van Hoek, Albert Jan; London School of Hygiene and Tropical Medicine, Infectious Disease Epidemiology<br>Green, Nathan; Imperial College London, Department of Infectious Disease Epidemiology<br>Conneely, Joanna; Public Health England, Healthcare Associated Infections and Antimicrobial Resistance<br>Harrington, Pauline; Public Health England, HCAI & AMR<br>Sheridan, Elizabeth; Public Health England,<br>Wilson, Jennie; University of West London,<br>Lamagni, Theresa; Public Health England, Healthcare Associated Infections and Antimicrobial Resistance |
| <b>Primary Subject Heading</b>: | Health economics                                                                                                                                                                                                                                                                                                                                                                                                                                                                                                                                                                                                                                                                            |
| Secondary Subject Heading:      | Obstetrics and gynaecology                                                                                                                                                                                                                                                                                                                                                                                                                                                                                                                                                                                                                                                                  |
| Keywords:                       | HEALTH ECONOMICS, Maternal medicine < OBSTETRICS, Epidemiology < INFECTIOUS DISEASES                                                                                                                                                                                                                                                                                                                                                                                                                                                                                                                                                                                                        |
|                                 |                                                                                                                                                                                                                                                                                                                                                                                                                                                                                                                                                                                                                                                                                             |

SCHOLARONE™  
Manuscripts

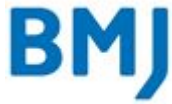

I, the Submitting Author has the right to grant and does grant on behalf of all authors of the Work (as defined in the below author licence), an exclusive licence and/or a non-exclusive licence for contributions from authors who are: i) UK Crown employees; ii) where BMJ has agreed a CC-BY licence shall apply, and/or iii) in accordance with the terms applicable for US Federal Government officers or employees acting as part of their official duties; on a worldwide, perpetual, irrevocable, royalty-free basis to BMJ Publishing Group Ltd ("BMJ") its licensees and where the relevant Journal is co-owned by BMJ to the co-owners of the Journal, to publish the Work in this journal and any other BMJ products and to exploit all rights, as set out in our [licence](#).

The Submitting Author accepts and understands that any supply made under these terms is made by BMJ to the Submitting Author unless you are acting as an employee on behalf of your employer or a postgraduate student of an affiliated institution which is paying any applicable article publishing charge ("APC") for Open Access articles. Where the Submitting Author wishes to make the Work available on an Open Access basis (and intends to pay the relevant APC), the terms of reuse of such Open Access shall be governed by a Creative Commons licence – details of these licences and which [Creative Commons](#) licence will apply to this Work are set out in our licence referred to above.

Other than as permitted in any relevant BMJ Author's Self Archiving Policies, I confirm this Work has not been accepted for publication elsewhere, is not being considered for publication elsewhere and does not duplicate material already published. I confirm all authors consent to publication of this Work and authorise the granting of this licence.



1  
2  
3 **Cost-benefit analysis of surveillance for surgical site infection following**  
4 **caesarean section**  
5  
6

7  
8 Catherine Wloch, Albert Jan van Hoek, Nathan Green, Joanna Conneely, Pauline  
9 Harrington, Elizabeth Sheridan, Jennie Wilson, Theresa Lamagni  
10  
11  
12

13  
14  
15  
16 Healthcare-Associated Infection and Antimicrobial Resistance Division, National  
17 Infection Service, Public Health England, London NW9 5EQ, UK  
18  
19  
20

21 Catherine Wloch  
22

23 Senior Scientist,  
24

25 Joanna Conneely  
26

27 Operations Manager,  
28

29 Pauline Harrington  
30

31 Surveillance Manager,  
32

33 Elizabeth Sheridan  
34

35 Consultant Microbiologist,  
36

37 Theresa Lamagni  
38

39 Senior Epidemiologist  
40  
41  
42  
43  
44  
45  
46  
47  
48  
49  
50  
51

52 Immunisation, Hepatitis, and Blood Safety Department, National Infection Service,  
53 Public Health England, London NW9 5EQ, UK  
54  
55  
56

57 Albert Jan van Hoek  
58  
59  
60

1  
2  
3 Health Economist / Infectious disease modeller  
4  
5  
6  
7

8  
9 Department of Infectious Disease Epidemiology, School of Public Health, Faculty of  
10  
11 Medicine, Imperial College London, London W2 1PG, UK  
12

13  
14 Nathan Green  
15

16  
17 Research Fellow  
18  
19  
20  
21

22 University of West London, London W5 5RF, UK  
23  
24

25 Jennie Wilson,  
26

27  
28 Reader Healthcare Epidemiology  
29  
30  
31  
32

33 Correspondence to: [Catherine.wloch@phe.gov.uk](mailto:Catherine.wloch@phe.gov.uk)  
34  
35  
36  
37  
38  
39  
40  
41  
42  
43  
44  
45  
46  
47  
48  
49  
50  
51  
52  
53  
54  
55  
56  
57  
58  
59  
60

## ABSTRACT

**Objective** To estimate the economic burden to the health service of surgical site infection following caesarean section and to identify potential savings achievable through implementation of a surveillance programme.

**Design** Economic model to evaluate the costs and benefits of surveillance from community and hospital healthcare providers' perspective.

**Setting** England.

**Participants** Women undergoing caesarean section in National Health Service hospitals.

**Main outcome measure** Costs attributable to treatment and management of surgical site infection following caesarean section.

**Results** The costs (2010) for a hospital carrying out 800 caesarean sections a year based on infection risk of 9.6% were estimated at £18,914 (95% CI 11,521 to 29,499) with 28% accounted for by community care (£5,370). With inflation to 2019 prices, this equates to an estimated cost of £5.0m for all caesarean sections performed annually in England 2018-19, approximately £1,866 and £93 per infection managed in hospital and community respectively. The cost of surveillance for a hospital for one calendar quarter was estimated as £3,747 (2010 costs).

Modelling a decrease in risk of infection of 30, 20 or 10% between successive surveillance periods indicated that a variable intermittent surveillance strategy achieved higher or similar net savings than continuous surveillance. Breakeven was reached sooner with the variable surveillance strategy than continuous surveillance

1  
2  
3 when the baseline risk of infection was 10 or 15% and smaller losses with a baseline  
4 risk of 5%.  
5  
6  
7

8  
9 **Conclusion** Surveillance of surgical site infections after caesarean section with  
10 feedback of data to surgical teams offers a potentially effective means to reduce  
11 infection risk, improve patient experience and save money for the health service.  
12  
13  
14

### 15 16 17 **Strengths and limitations** 18

- 19  
20 • The model estimated both community (28%) and hospital costs (72%),  
21 providing a more representative estimate of overall economic burden to the  
22 health service.  
23  
24
- 25 • Time-matching of patients with and without infection according to length of  
26 post-operative stay provided a more accurate assessment of excess bed-days  
27 attributable to surgical site infection (2.6 days) than average excess length of  
28 stay (median difference 5 days) comparison by disentangling the impact of  
29 prolonged length of stay on increased chance of detecting an infection.  
30  
31
- 32 • Through capture and assessment of the costs and impact of surveillance, our  
33 model demonstrated the potential for savings through reductions in incidence  
34 of surgical site infections.  
35  
36
- 37 • Costs were obtained from NHS National Schedule Reference Costs and other  
38 sources rather than observed expenditure and assumptions made about the  
39 number of extra midwife and general practitioner appointments resulting from  
40 infection.  
41  
42
- 43 • The study was based on healthcare utilisation and did not assess direct and  
44 indirect costs borne by the patients or their carers.  
45  
46  
47  
48  
49  
50  
51  
52  
53  
54  
55  
56  
57  
58  
59  
60

## INTRODUCTION

Caesarean section delivery rates have risen in recent years in many Organisation for Economic Co-operation and Development (OECD) countries and ranged from 15.5% of deliveries in Finland to 53.1% in Turkey in 2015.<sup>1</sup> In England caesarean section rates have risen from 9% of deliveries in 1980 to 30% in 2018-19.<sup>2</sup>

Surgical site infection is a common and potentially serious complication of caesarean section with risk of infection of 9-11% reported previously in the UK.<sup>3,4</sup> The majority of post-caesarean surgical site infections are superficial infections of the skin and subcutaneous tissue which can be managed by the community midwife and general practitioner. However, in the UK, 10-13% are more serious deep infections of the muscle and fascial layer or organ/space infections (endometritis and reproductive tract infections)<sup>4-6</sup> which may require readmission to hospital. As well as causing anxiety and pain for the patient, these infections result in costs to the health service both in terms of excess length of hospital stay and for treatment of the infections in the community. In very rare instances, a surgical site infection following caesarean section can have fatal consequences.<sup>7</sup>

The use of surveillance to measure the risk of surgical site infection and feedback of results to surgeons has been shown to be effective in reducing the risk of infection.<sup>8-10</sup> However, surveillance of surgical site infection is resource-intensive and studies to assess its cost-benefit have not been conducted. The Surgical Site Infection Surveillance Service at Public Health England provides national coordination for surgical site infection surveillance for hospitals in England. In 2009 Public Health England conducted a multi-centre study of surgical site infection following caesarean section to test the feasibility of post-discharge detection methods and establish a

1  
2  
3 national benchmark for infection risk.<sup>6</sup> Based on the findings from the study, we  
4  
5 undertook a further assessment of the economic burden of infection and the potential  
6  
7 savings achievable through establishing surveillance as a means to stimulate a  
8  
9 review of clinical practices and direct infection prevention measures.  
10  
11  
12  
13  
14  
15

## 16 **METHODS**

17  
18  
19  
20 A cost-benefit model was constructed to estimate the costs to the health service of  
21  
22 managing surgical site infection post-caesarean section both in hospital and in the  
23  
24 community.  
25  
26

### 27 **Cohort study**

28  
29  
30 The estimated risk of infection was based on data captured during a multi-centre  
31  
32 cohort study which followed a protocol with standard case finding methods and  
33  
34 definitions of infection.<sup>6</sup> Of the 4107 women followed-up after caesarean section  
35  
36 across the 14 National Health Service centres participating in the 2009 study, 9.6%  
37  
38 (394) developed a surgical site infection meeting the study case definitions. Overall  
39  
40 11.2% (44) of infections were organ/space (endometritis and female genital tract  
41  
42 infections) or deep incisional infections and the remaining 88.3% were superficial  
43  
44 incisional infections. In the cohort study, surgical site infections were detected  
45  
46 during the initial inpatient hospital admission in which the caesarean section was  
47  
48 performed, at readmission to hospital, in the community by midwives visiting women  
49  
50 in their own home or via a patient questionnaire at 30 days after the operation.  
51  
52 According to the study protocol, if an infection was detected via more than one  
53  
54 method, a hierarchical approach was used to assign detection method such that if a  
55  
56 patient reported (community treated) infection was also identified by the community  
57  
58  
59  
60

midwife or other outpatient visit then the surgical site infection was reported as detection by midwife or other hospital healthcare professional respectively. Similarly, if the patient was readmitted, then detection was recorded as 'at readmission' rather than patient reported or detected by midwife/other healthcare professional.

Standard case definitions, based on clinical and laboratory findings, were used to identify surgical site infection that occurred up to 30 days after the operation.<sup>6 11</sup>

Table 1 shows the parameters taken from the cohort study for use in the model.

**Table 1. Parameters for surgical site infection (SSI) risk used in the model**

| Detection method                               | Infection risk |
|------------------------------------------------|----------------|
| All methods combined                           | 9.59%          |
| Inpatient detected                             | 0.51%          |
| Inpatient detected SSI subsequently readmitted | 0.05%          |
| Readmission detected                           | 0.56%          |
| Community Midwife detected                     | 5.31%          |
| Self-reported by patient                       | 3.21%          |

Seven of the participating hospitals repeated the surveillance for a further three-month period and the risk of infection were compared between these two periods. The seven hospitals who repeated the surveillance for a second period carried out a total of 1212 operations with 131 infections in the first period (10.8% risk) and 1235 operations with 89 infections (7.2% risk) in the second period. A slight but non-significant increase in infection risk was observed for two of the seven hospitals, whereas five hospitals experienced a decrease in infection risk, three of which were significant (Figure 1). The mean reduction in infection risk between the 2 periods across all hospitals was -31.2% (range from -73.3 to 19.5%).

### Hospital treatment costs

1  
2  
3 Costs were modelled on a hospital undertaking a three-month period of surveillance  
4 and conducting 800 caesarean sections per year (the approximate average number  
5 of operations for hospitals participating in the multi-centre study).  
6  
7  
8

9  
10  
11 The length of the initial hospital stay during which the caesarean section was  
12 performed was derived from data captured during the study. Rather than a simple  
13 comparison of length of stay for women with and without a surgical site infection, a  
14 case-control paired matching approach was used to estimate excess length of stay  
15 for patients with an infection diagnosed during the inpatient stay. All controls must  
16 have had a post-operative length of stay at least as long as the infection free period  
17 of stay of the paired case. The total post-operative length of stay of a patient with  
18 surgical site infection (case) and total length of stay of matched patients without  
19 infection (controls) was compared. The mean average of paired differences between  
20 cases and controls was calculated. Under the assumption that the exposure to  
21 infection is from the time of surgery onwards, then the time in hospital before  
22 caesarean section is assumed not to put the patients at additional risk of surgical site  
23 infection. As well as matching controls to the infection free period of the case, we  
24 selected controls by identifying patients matched on confounders to account for  
25 varying length of stay (age, antimicrobial prophylaxis, American Society of  
26 Anesthesiologists physical status score, body mass index category, blood loss,  
27 diabetes, duration of active labour, duration of operation, urgency of risk category,  
28 and wound class).  
29  
30  
31  
32  
33  
34  
35  
36  
37  
38  
39  
40  
41  
42  
43  
44  
45  
46  
47  
48  
49  
50  
51

52  
53 Case records of patients identified from the cohort study as having been readmitted  
54 for a surgical site infection were linked to National Health Service (NHS) Digital  
55 Hospital Episode Statistics© (HES) Admitted Patient Care Records to derive  
56  
57  
58  
59  
60



1  
2  
3 information on length of readmission stay and diagnostic reason for readmission.

4  
5 This enabled additional costs due to readmission to be calculated for: a) the patients  
6  
7 from the cohort study who had an infection detected during the inpatient period who  
8  
9 were also readmitted to hospital for further treatment and b) the patients from the  
10  
11 cohort study whose infection was initially diagnosed at readmission.  
12  
13

14  
15 The average cost of excess bed days and readmissions was identified from codes in  
16  
17 Healthcare Resource Group data (standard groupings of clinically similar treatments  
18  
19 which use common levels of healthcare resource listed within HES data) assigned to  
20  
21 each patient hospital spell and linked to the National Schedule Reference Costs (the  
22  
23 average unit cost to the NHS of providing a defined service, 2010).<sup>12</sup>  
24  
25

### 26 27 28 **Community treatment costs**

29  
30 Community costs of treating and managing surgical site infection were estimated  
31  
32 based on the assumption of one extra midwife visit, one general practitioner visit and  
33  
34 one course of antibiotics for each surgical site infection detected by a midwife. For  
35  
36 patient reported infections this was assumed to be one general practitioner visit and  
37  
38 one course of antibiotics. The cost of a community midwife post-natal visit was  
39  
40 identified from National Schedule Reference Costs and a general practitioner visit  
41  
42 from Unit Costs of Health and Social Care (Personal Social Services Research Unit).  
43  
44 Antibiotic costs were obtained from the NHS Drugs Tariff.<sup>13</sup>  
45  
46  
47  
48

49  
50 The proportion of patients in the study with community reported surgical site infection  
51  
52 accompanied by positive microbiology results was employed to derive model  
53  
54 parameters for microbiological testing. Positive microbiology results were recorded  
55  
56 for 43% of the community midwife detected surgical site infections and 30% of  
57  
58  
59  
60

1  
2  
3 patient reported infections in the cohort study. Microbiology costs were obtained by  
4  
5 personal communication with consultant microbiologists from two NHS Trusts.  
6  
7

### 8 9 **Hospital surveillance costs**

10  
11 Information on the staff time required to conduct a three-month period of surveillance  
12  
13 and administer patient questionnaires was provided by three hospitals who  
14  
15 participated in the multi-centre study. Expenses for other resources (stationery,  
16  
17 telephone calls, stamps) needed to carry out surveillance were also recorded. This  
18  
19 information was used to determine the average cost of surveillance (including gross  
20  
21 salary costs) for a hospital conducting 800 caesarean sections per year.  
22  
23  
24  
25

### 26 27 **Cost-benefit analysis**

28  
29 The uncertainty around the overall costs was calculated using the appropriate  
30  
31 binomial distributions for the number of infections detected based on the proportions  
32  
33 in the sample from the study and the reference prices. The 95% confidence interval  
34  
35 was obtained by running 10,000 simulations in @Risk 5.0 (risk analysis software)  
36  
37 using Excel 2007. For the length of stay, a non-parametric approach was used for  
38  
39 matching patients with a jack-knife error estimate, and a normal approximation was  
40  
41 then used for the standard error on the expected length of stay which was assumed  
42  
43 to be approximately normal.  
44  
45  
46  
47

48  
49 The cost-benefit model compared the total 2019 costs to the healthcare system of a  
50  
51 scenario with and without surveillance in place (healthcare provider's perspective).

52  
53 The costs identified for surgical site infection following caesarean section were used  
54  
55 to model the balance of surveillance costs versus savings over a five year period  
56  
57 (with discounting of costs at 3.5% to reflect value over the time of the analysis)<sup>14</sup>  
58  
59 using Microsoft Excel. Different surveillance strategies were modelled, together with  
60

1  
2  
3 three baseline infection risks and three potential average reductions in risk of  
4  
5 infection between each surveillance period.  
6  
7

8  
9 The three average rates of reduction in infection risk were selected for the model  
10  
11 given the reductions in caesarean section surgical site infection achieved during our  
12  
13 cohort study (31%), also seen in other European single site studies (70-80%  
14  
15 between interventions)<sup>15,16</sup> and observed across European surveillance networks  
16  
17 (e.g. approximately 33% over 4 years for United Kingdom, except England).<sup>17</sup>  
18  
19

20  
21 A range of scenarios were tested as follows:  
22

- 23  
24 A. baseline infection risk of 5, 10 or 15%  
25  
26 B. surveillance strategies of  
27  
28 a. one 3-month surveillance quarter a year  
29  
30 b. two 3-month surveillance quarters a year  
31  
32 c. continuous surveillance (in 3-month periods)  
33  
34 C. average reductions of 10, 20 or 30% in infection risk during each surveillance  
35  
36 period.  
37  
38  
39  
40

41  
42 When calculating reductions in surgical site infection risk, the model reflected a  
43  
44 constant reduction rate over the five year period of study whereby the risk for each  
45  
46 surveillance period was iteratively calculated from the surgical site infection risk of  
47  
48 the previous surveillance period. A fourth surveillance strategy with a variable  
49  
50 programme was also modelled: continuous surveillance for hospitals with a surgical  
51  
52 site infection risk over 10%, 2 surveillance quarters a year for surgical site infection  
53  
54 risk between 5 and 10% and one surveillance period a year for surgical site infection  
55  
56 risk <5%.  
57  
58  
59  
60

1  
2  
3 The simulations assumed that average reductions in risk of disease were achieved  
4 through infection control measures taken during each surveillance period and  
5 sustained between surveillance periods. The calculations also assumed an  
6 irreducible minimum infection risk of 3% could be reached at which point no further  
7 reductions in risk of infection would be included in the model and surveillance would  
8 be reduced to one quarter per year.  
9  
10  
11  
12  
13  
14  
15  
16  
17

### 18 **Patient and Public Involvement**

19  
20 Patients or the public were not involved in the design, conduct, reporting or  
21 dissemination of our research.  
22  
23  
24  
25

26 This study falls within the remit of Public Health England to use patient data without  
27 explicit consent under Regulation 3 of the Health Service (Control of Patient  
28 Information) Regulations 2002 for surveillance and control of public health hazards  
29 explicitly including infectious disease.  
30  
31  
32  
33  
34  
35  
36  
37  
38  
39

## 40 **RESULTS**

### 41 **Treatment costs**

42  
43 The estimated 2010 costs to hospital and community of surgical site infection  
44 following caesarean section at a model hospital conducting 800 caesarean sections  
45 per year are shown in Table 2. For the initial hospital stay (during which the  
46 caesarean section was performed) the difference in median length of stay for the 21  
47 patients with an infection detected during that inpatient stay, compared to those  
48 without an infection, was five days. Using an alternative case-control paired  
49 matching approach to account for time at risk and differences in factors other than  
50  
51  
52  
53  
54  
55  
56  
57  
58  
59  
60

1  
2  
3 the surgical site infection which may have increased length of stay (such as patient  
4 comorbidity), the number of excess days due to surgical site infection detected  
5  
6 during the initial inpatient stay was calculated as 2.60 days (standard error 0.082).  
7  
8  
9

10  
11 Costs associated with a) 2 patients subsequently readmitted to hospital for further  
12 treatment of infections detected during the initial inpatient stay and b) for  
13 readmission of 23 patients for surgical site infection, were derived from Healthcare  
14 Resource Group data. The most commonly identified codes associated with the  
15 readmission spell for infection of the patients in the cohort study were: 'NZ05  
16 Antenatal and Post-natal investigation (0 days)', 'NZ08 Antenatal and Post-natal  
17 investigation (1 day or more)'. The cost to community healthcare of microbiological  
18 testing was estimated from the mean microbiology cost of £13.74 reported by the  
19 two NHS hospitals (including pay and consumables), together with the proportions of  
20 positive microbiology results recorded in the cohort study for community midwife  
21 detected and patient reported infections.  
22  
23  
24  
25  
26  
27  
28  
29  
30  
31  
32  
33  
34  
35  
36

37 The estimated hospital costs resulting from a 9.6% infection risk at a model hospital  
38 conducting 800 caesarean sections a year were estimated to be £13,544 with  
39 community costs estimated at £5,370, an overall cost of £18,914. Uncertainty  
40 calculations (95% confidence interval) indicated a minimum of £11,521 and  
41 maximum £29,499 with the most influential parameters being infections detected on  
42 readmission, inpatient detected infections and incidence of readmission of the  
43 patients whose surgical site infection were already detected as inpatients. The two  
44 main drivers of the uncertainty in the overall outcome were the incidence of  
45 readmission and the uncertainty around the excess length of stay.  
46  
47  
48  
49  
50  
51  
52  
53  
54  
55  
56  
57  
58  
59  
60

1  
2  
3 Costs were inflated to 2019 prices (Table 2) using the OECD Consumer Prices Index  
4  
5 for the United Kingdom (Total less food, less energy).<sup>18</sup> This resulted in hospital  
6  
7 costs of £16,047, Community costs of £6,363 and total cost of £22,409. If the 9.6%  
8  
9 infection risk identified in our cohort study was applied to the 179,475 caesarean  
10  
11 sections performed annually in England (2018-19) this would be equivalent to 17,212  
12  
13 infections resulting in an estimated cost of £5.0 million. The approximate cost per  
14  
15 infection treated in hospital during inpatient or readmission stay was £1866 and was  
16  
17 £93 for infections managed in the community by community midwives or general  
18  
19 practitioners after discharge.  
20  
21  
22  
23  
24

### 25 **Surveillance costs**

26  
27 Information provided by participating hospitals indicated that a surveillance nurse  
28  
29 would require time equivalent to two days a week for surveillance of 200 patients  
30  
31 undergoing caesarean section for one quarter. The estimated cost for one quarter of  
32  
33 surveillance at the model hospital carrying out 800 caesarean sections a year was  
34  
35 calculated at £3,747 including administrative costs (2010 prices) and £4,439 when  
36  
37 inflated to 2019 costs (Table 3).  
38  
39  
40  
41  
42  
43  
44  
45  
46  
47  
48  
49  
50  
51  
52  
53  
54  
55  
56  
57  
58  
59  
60

**Table 2.** Estimated annual hospital and community costs to the NHS arising due to surgical site infection following caesarean section for a model hospital conducting 800 caesarean sections per year

| Treatment stage                                  | Item | Estimate                              | (95% CI)* | Hospital costs (£) | Community costs (£) | Total costs (£)  | (95% CI)*                   | +Inflated costs  |
|--------------------------------------------------|------|---------------------------------------|-----------|--------------------|---------------------|------------------|-----------------------------|------------------|
| <b>Infections detected during inpatient stay</b> | a    | Excess length of stay (days)          | 2.6       | (2.44 to 2.76)     |                     |                  |                             |                  |
|                                                  | b    | Value per bed day                     | £444.00   |                    |                     |                  |                             |                  |
|                                                  | c    | No. cases (0.51% of 800 women)        | 4.1       | (2.3 to 5.8)       |                     |                  |                             |                  |
|                                                  |      | <b>Total = (a*b*c)</b>                |           |                    | <b>£4,722.82</b>    |                  |                             | <b>£5,595.68</b> |
| Inpatient detected SSI subsequently readmitted   | a    | Average HRG cost per spell            | £1,092.20 |                    |                     |                  |                             |                  |
|                                                  | b    | Spells per patient                    | 1         |                    |                     |                  |                             |                  |
|                                                  | c    | No. cases (0.05% of 800 women)        | 0.4       | (0 to 1)           |                     |                  |                             |                  |
|                                                  |      | <b>Total = (a*b*c)</b>                |           |                    | <b>£428.14</b>      |                  |                             | <b>£507.27</b>   |
| <b>Infections detected at readmission</b>        | a    | Average HRG cost per spell            | £1,387.67 |                    |                     |                  |                             |                  |
|                                                  | b    | Spells per patient                    | 1.35      |                    |                     |                  |                             |                  |
|                                                  | c    | No. cases (0.56% of 800 women)        | 4.5       | (2.7 to 6.2)       |                     |                  |                             |                  |
|                                                  |      | <b>Total = (a*b*c)</b>                |           |                    | <b>£8,392.63</b>    |                  |                             | <b>£9,943.74</b> |
| <b>Infections detected by community midwife</b>  | a    | 1 extra midwife visit                 | £63.00    |                    |                     |                  |                             |                  |
|                                                  | b    | 1 extra visit to GP                   | £30.00    |                    |                     |                  |                             |                  |
|                                                  | c    | 1 course antibiotics                  | £4.27     |                    |                     |                  |                             |                  |
|                                                  | d    | Microbiology (£13.74)*43%             | £5.91     |                    |                     |                  |                             |                  |
|                                                  | e    | No. cases (5.31% of 800 women)        | 42.4      | (37.0 to 47.8)     |                     |                  |                             |                  |
|                                                  |      | <b>Total (a+b+c+d)*e</b>              |           |                    |                     | <b>£4,383.01</b> |                             | <b>£5,193.07</b> |
| <b>Self-reported infections</b>                  | a    | 1 extra visit to general practitioner | £30.00    |                    |                     |                  |                             |                  |
|                                                  | b    | 1 course antibiotics (£4.27)          | £4.27     |                    |                     |                  |                             |                  |
|                                                  | c    | Microbiology (£13.74)*30%             | £4.12     |                    |                     |                  |                             |                  |
|                                                  | d    | No. cases (3.21% of 800 women)        | 25.7      | (21.4 to 30.0)     |                     |                  |                             |                  |
|                                                  |      | <b>Total = (a+b+c)*d</b>              |           |                    |                     | <b>£987.14</b>   |                             | <b>£1,169.58</b> |
| <b>Total costs</b>                               |      |                                       |           | <b>£13,544</b>     | <b>£5,370</b>       | <b>£18,914</b>   | <b>(£11,521 to £29,499)</b> | <b>£22,409</b>   |

\*CI=Confidence Interval. †Inflated to 2019 prices using UK Consumer Price Index – Total less food, less energy (OECD Data)

HRG=Healthcare Resource Group, SSI=Surgical site infection

**Table 3.** Estimated costs for a 3-month surveillance period for surgical site infection following caesarean section for a model hospital conducting 800 caesarean sections per year

| Surveillance       | Item | Surveillance                                            | Total            | Inflated costs†  |
|--------------------|------|---------------------------------------------------------|------------------|------------------|
| Surveillance nurse | a    | 0.4 equivalent Band 6 Surveillance nurse (24% on costs) | £14,614          |                  |
|                    | b    | 1 surveillance quarter                                  | 0.25             |                  |
|                    |      | Total (a*b)                                             |                  | £3,653.54        |
| Administration     | a    | Stationery/photocopying/stamps/phone calls              | £0.47            |                  |
|                    | b    | Patients in surveillance quarter                        | 200              |                  |
|                    |      | Total (a*b)                                             |                  | £93.00           |
| <b>Total cost</b>  |      |                                                         | <b>£3,746.54</b> | <b>£4,438.97</b> |

†Inflated to 2019 prices using UK Consumer Price Index – Total less food, less energy (OECD Data)



## Modelling cost savings from surveillance

As might be expected, the model simulations estimating the balance of surveillance expenditure versus savings covering a period of 5 years indicated that surgical site infection risk reduced more quickly for the continuous surveillance strategy than for either one or two quarters a year surveillance where the same baseline infection risk and reductions in risk of infection were applied (Figures 2-4).

Where the hospital baseline infection risk was 10%, similar to the mean surgical site infection risk in the cohort study, savings over the period of simulation were greater than the costs of surveillance for all the surveillance strategies where reductions of 20 or 30% in the risk of infection were achieved. Breakeven was achieved by the end of Year 2 (or sooner) where reductions of 30% between successive surveillance periods were applied and by the end of Year 3 (or sooner) for reductions of 20% (Figure 3). Net savings of £26,021 over the five year period were achieved for a strategy of continuous surveillance with a 20% reduction in infection risk. The simulation for a hospital with a baseline infection risk of 5% indicated that savings from reducing surgical site infection risk did not offset the costs of surveillance for any of the surveillance strategies.

For a hospital with a baseline surgical site infection risk of 15%, all of the surveillance strategies achieved savings greater than the costs of surveillance over the 5 year period of the simulation when reductions in infection risk of 10, 20 or 30% were applied. Breakeven was achieved by the end of Year 2 (or sooner) where reductions of 20% and 30% at each surveillance period were applied (Figure 4). A saving of £63,217 over the period of simulation was obtained for a 15% baseline

1  
2  
3 infection risk achieving a 20% reduction in infections at each surveillance period and  
4  
5 employing a continuous surveillance strategy.  
6  
7

8  
9 When the variable surveillance strategy was modelled (Figure 5) this responsive  
10  
11 strategy estimated a net saving of £63,234 would be achieved for a hospital with a  
12  
13 15% baseline infection risk achieving a 20% reduction in infections at each  
14  
15 surveillance period (£26,696 savings for 10% infection risk with 20% reductions).  
16  
17 For hospitals with a 15% baseline infection risk, breakeven points for the variable  
18  
19 surveillance strategy were slightly later compared to the fixed surveillance strategies  
20  
21 of one or two surveillance periods a year, due to the continuous surveillance  
22  
23 component of the variable strategy. However, for a 10% baseline infection risk,  
24  
25 breakeven was earlier or at the same time for the variable surveillance strategy  
26  
27 compared to the original fixed surveillance strategies.  
28  
29  
30  
31

32  
33 Overall breakeven was reached within the 5 year simulation period with the variable  
34  
35 surveillance strategy for scenarios where hospitals had a baseline infection risk of 10  
36  
37 or 15% (Figures 6-8). The variable surveillance strategy achieved higher (5/9  
38  
39 scenarios) or similar net savings (1/9 scenarios) compared to the original  
40  
41 surveillance strategies for the equivalent baseline infection risk and reductions in risk  
42  
43 of infection. The variable surveillance strategy for hospitals with a 5% baseline risk  
44  
45 of infection was equivalent to the one surveillance period a year strategy and  
46  
47 therefore resulted in equal losses (3/9 scenarios).  
48  
49  
50

51  
52 A tool has been designed, based on the costs identified in this study for caesarean  
53  
54 section, to predict the time to breakeven for a model hospital employing the variable  
55  
56 surveillance strategy and applying self-selecting baseline infection risk, predicted  
57  
58 reductions in infection and volume of surgery (supplementary material).  
59  
60

## DISCUSSION

Our study estimated that surgical site infections in caesarean section cost the National Health Service in England £5.0 million a year, equating to £22,409 for a typical hospital conducting 800 caesarean sections per year. Through capture and assessment of the costs of surveillance, our model showed that the benefits of a surveillance strategy can outweigh the costs through reductions in incidence of surgical site infections.

Excess length of stay of patients with infection compared to patients without is frequently used as a proxy for combined inpatient attributable costs. As median length of stay for caesarean section patients was 3 days at the time of the study, and median time to infection was 10 days, the majority of surgical site infections would have occurred after discharge. However, if a woman remains in hospital for reasons other than surgical site infection there is a chance she might develop a surgical site infection which would otherwise have been detected and managed in the community by her midwife or general practitioner. Therefore, a naïve comparison of length of stay between patients with and without a surgical site infection would have produced an overestimate because it would not disentangle the increased chance of detecting an infection for those patients with a prolonged length of stay due to other reasons.<sup>19</sup>

<sup>20</sup> A suitable calculation method should account for patient heterogeneity and timing of events to avoid biasing results. A multistate model estimate which accounted for the time-dependent bias was considered, however this did not naturally incorporate patient heterogeneity. An alternative option was to use a confounder and time matching approach, where suitable control patients should be "at risk" of acquiring an infection at the time of infection of the corresponding case, which can be satisfied

1  
2  
3 by using the time-to-infection as an additional matching criteria. The advantage of  
4 the method used in this study, of matching infected patients with similar uninfected  
5 patients with comparable length of post-operative stay prior to infection, is that it  
6 produced a more accurate assessment of the excess length of stay directly  
7 attributable to the surgical site infection (2.6 days) than the average excess length of  
8 stay (median 5 days).  
9

10  
11  
12 The largest contribution to the overall costs (and the uncertainty) for the model  
13 hospital is the excess post-delivery length of stay and the readmission of patients.  
14 This equates to approximately £1,866 per infection detected during the inpatient stay  
15 or leading to readmission. There are few studies describing costs for surgical site  
16 infection following caesarean section and comparisons are hampered by differences  
17 in methodology.<sup>21 22</sup> The cost of £1,866 in this study is lower than the median cost of  
18 £3,716 calculated by Jenks *et al.*<sup>21</sup> There were differences between the two studies  
19 in length of stay calculated to be attributable to surgical site infection between (4  
20 days versus 2.6 in this study). Our study used a case-matching methodology to  
21 account for both time at risk and extraneous factors which would lead to an  
22 overestimation of excess length of stay. This, along with our inclusion of data from  
23 multiple centres as opposed to a single site may account for differences in our cost  
24 estimates. In our multicentre study the majority of infections (52%) detected at  
25 readmission and 24% of those detected during the initial inpatient stay were the  
26 more serious infections (deep incisional or organ/space) which are likely to require  
27 more extensive treatment, such as debridement or re-suturing, than superficial  
28 infections. In contrast only 13% of midwife detected surgical site infections were  
29 deep or organ/space infections.  
30  
31  
32  
33  
34  
35  
36  
37  
38  
39  
40  
41  
42  
43  
44  
45  
46  
47  
48  
49  
50  
51  
52  
53  
54  
55  
56  
57  
58  
59  
60

1  
2  
3 Previous studies have focussed primarily on hospital costs.<sup>21-23</sup> By including an  
4  
5 estimate of the costs in the community in this analysis a more representative  
6  
7 estimate of overall economic burden to the health service was achieved. More than  
8  
9 28% of the economic burden arose in the community where the majority of these  
10  
11 infections are managed. A study of breast surgery in England which included post-  
12  
13 discharge follow-up also found a similar proportion of costs incurred in the  
14  
15 community (31%).<sup>24</sup> In contrast a study conducted in Scotland in 2001, using actual  
16  
17 rather than estimated bed days and general practitioner visits, identified 11% of  
18  
19 treatment costs resulting from surgical site infection occurred in the community.<sup>25</sup>  
20  
21 However, that study included non-obstetric surgical procedures (which would not  
22  
23 have incurred midwife costs).  
24  
25  
26  
27  
28

### 29 Limitations

30  
31 As well as applying the National Schedule Reference Costs to provide the average  
32  
33 cost of hospital stay, rather than actual observed expenditure, various assumptions  
34  
35 have been made in this study including the number of extra midwife and general  
36  
37 practitioner appointments resulting from infection. However, there are likely to be  
38  
39 additional costs to those outlined. For example, some of the patients readmitted for  
40  
41 more serious infections may also require a hospital outpatient follow-up appointment  
42  
43 or further general practitioner visits. Also, additional outpatient appointments and  
44  
45 more than one course of antibiotics may be needed to treat infections identified by  
46  
47 midwives and general practitioners. Given that our analysis was based on  
48  
49 healthcare utilisation, excluding additional costs (direct and indirect) incurred by the  
50  
51 affected women or their carers, the true costs associated with these infections are  
52  
53 likely to be higher than our estimates. The intangible costs resulting from the pain  
54  
55 and suffering of the women were not assessed although wound infections and  
56  
57  
58  
59  
60

1  
2  
3 endometritis following caesarean section have been reported to increase anxiety and  
4 delay physical recovery for these women, with consequent impact on their ability to  
5 care for their new born.<sup>26</sup> Whilst the majority of women will be on maternity leave,  
6 family members or other carers may require time off work to look after the patient or  
7 to provide childcare for the new-born or other children. An extensive prospective  
8 study would be required to gain more comprehensive information on the detailed  
9 costs associated with surgical site infection following caesarean section.  
10  
11  
12  
13  
14  
15  
16  
17  
18  
19

20 Although the reductions in surgical site infection risk in the model are supported by  
21 the data from the cohort study (Figure 1) the surveillance was only repeated once  
22 and two of hospitals did not achieve reductions. Therefore, there is no guarantee  
23 that such reductions would be sustained over time. Additionally, decreases in risk of  
24 infection between surveillance cycles will in reality vary over time within a given  
25 hospital and a constant rate of reduction in infections is unlikely to offer a true  
26 reflection of this pattern. This study has applied an average reduction rate in risk of  
27 infection but, as further information becomes available on patterns of reduction, the  
28 model can be adapted.  
29  
30  
31  
32  
33  
34  
35  
36  
37  
38  
39  
40  
41

42 There may be additional costs associated with setting up and running surveillance  
43 such as training community midwives and feedback meetings with surgeons but  
44 these costs can be minimised by incorporating time into existing infection prevention,  
45 maternity or surgical meetings. Whilst it could be argued that surveillance drives  
46 adherence to infection control practices that should be in place already, where such  
47 measures are not in place additional infection prevention and control measures may  
48 incur costs. However, changes to many infection prevention measures may be cost-  
49  
50  
51  
52  
53  
54  
55  
56  
57  
58  
59  
60

1  
2  
3 neutral and additional costs for specific interventions can be considered once  
4  
5 identified.  
6  
7

8  
9 The community costs estimated in this study are not incurred by the hospital and, as  
10  
11 hospitals would not realise any savings from community care by reducing these  
12  
13 infections, this could be a disincentive to hospitals carrying out surveillance and  
14  
15 setting up new infection control measures.  
16  
17

### 18 19 Implications for surveillance

20  
21 Surgical site infection surveillance schemes which include feedback of results to  
22  
23 surgeons have been found to reduce risk of infections<sup>27 28</sup> and individual hospitals  
24  
25 have successfully reduced infection risk by applying measures to improve practice.<sup>15</sup>  
26  
27  
28<sup>29</sup> The NICE<sup>30</sup> and WHO<sup>31</sup> guidelines for preventing surgical site infection  
29  
30 recommend various approaches to reduce infection risk including the timing of  
31  
32 antimicrobial prophylaxis, avoiding shaving, antiseptic skin preparation, maintaining  
33  
34 patient homeostasis, covering wounds with an interactive dressing and prevention of  
35  
36 hypothermia.<sup>32</sup> Whilst health services may aim to achieve a zero risk of infection, it  
37  
38 is likely that there is an irreducible minimum risk for some surgical categories beyond  
39  
40 which there will be limited opportunities for further reductions. Such a possibility was  
41  
42 built into the model. In some hospitals, high infection risks may be due to underlying  
43  
44 systemic problems and reductions in infection risk may take longer in these more  
45  
46 complex situations. Local needs of individual hospitals will need to be assessed.  
47  
48  
49  
50

51  
52 This study estimated the cost of surveillance for one 3-month period as £4,439 for a  
53  
54 model hospital conducting 800 caesarean sections a year. A continuous  
55  
56 surveillance programme would provide a more rapid decrease in infection risk, when  
57  
58 accompanied by improvements in care, than surveillance strategies of one or two  
59  
60

1  
2  
3 quarters a year. However, although the continuous surveillance model achieved  
4 savings for hospitals with higher baseline infection risk, it did not achieve the  
5  
6 greatest balance of saving against costs of surveillance over the 5 year simulation  
7  
8 period for scenarios with a 10% reduction in infections between surveillance periods.  
9  
10 The variable surveillance model achieved similar or greater savings or smaller losses  
11  
12 for all baseline infection risks. Extrapolating from these findings, hospitals could  
13  
14 consider a variable surveillance strategy of continuous surveillance for hospitals with  
15  
16 high risk of infection (greater than 10%) to rapidly reduce infections and patient harm  
17  
18 as quickly as possible. Surveillance for caesarean section could then be reduced to  
19  
20 two quarters a year once the infection risk has decreased to 10% and to one quarter  
21  
22 per year when the infection risk declines to 5% to maximise savings. In terms of cost  
23  
24 saving this approach is supported by the model estimates for such a variable  
25  
26 surveillance programme identified by this study. A minimum surveillance strategy of  
27  
28 one quarter a year would then be useful to reinforce infection control measures and  
29  
30 provide continued vigilance to sustain low levels of infection. However, the strategy  
31  
32 outlined in this model may not be applicable to other surgical categories, particularly  
33  
34 those with a low infection risk.  
35  
36  
37  
38  
39  
40  
41  
42

43 Although a variable surveillance strategy can be less costly and can be tailored to  
44  
45 the baseline infection risk of a hospital, conducting continuous surveillance has  
46  
47 advantages. These include having well established surveillance systems with  
48  
49 methodology embedded in practice, and providing a more precise estimate of  
50  
51 infection risk where surgical volumes are low. Additional savings to those presented  
52  
53 in this study could be achieved through reducing surveillance costs, for example  
54  
55 through use of patient-facing digital technologies, currently under development, to  
56  
57 collect patient-reported infections.<sup>33</sup>  
58  
59  
60



## Patient outcomes

The number of caesarean sections performed each year in England has been rising since the 1980s<sup>2</sup> accompanied by an increase in the proportion of women of child bearing age who are obese.<sup>34</sup> High BMI has been identified as a key risk factor for surgical site infection following caesarean section.<sup>6</sup> This means that with rising obesity surgical site infections are likely to become an increasing burden for the health service. Reducing the risk of infections following caesarean section is an important health issue for these women who are otherwise generally young and healthy.

The multi-centre cohort study identified 1 in 10 women with surgical site infection following caesarean section.<sup>6</sup> There is currently no national surveillance for surgical site infection following caesarean section in England, although it is mandatory in Scotland, Wales and Northern Ireland and there is considerable support from hospitals to introduce this in England.<sup>35 36</sup>

Although costs incurred by surgical site infection following caesarean section are lower than those associated with infections following orthopaedic and other surgical categories,<sup>37-40</sup> infections post-caesarean can still lead to serious outcomes,<sup>7 41 42</sup> and may give rise to high cost clinical negligence claims.<sup>43</sup> However, the decision to attempt to reduce risk of surgical site infection is not solely about cost saving. Hospitals have a duty to avoid harm to the patient, reduce antibiotic consumption and improve patient experience.

## Conclusion

Surgical site infection following caesarean section causes pain and anxiety to new mothers and incurs a financial burden to the healthcare system in both community and

1  
2  
3 hospital healthcare settings. Integrating caesarean section surveillance into the  
4 national surveillance programme would provide hospitals with the infrastructure (and  
5 national benchmark) for reducing infection by feeding back data and there by  
6  
7  
8  
9  
10 empowering staff to take action to improve patient care and potentially reduce costs.  
11  
12  
13  
14  
15  
16  
17  
18  
19  
20  
21  
22  
23  
24  
25  
26  
27  
28  
29  
30  
31  
32  
33  
34  
35  
36  
37  
38  
39  
40  
41  
42  
43  
44  
45  
46  
47  
48  
49  
50  
51  
52  
53  
54  
55  
56  
57  
58  
59  
60

For peer review only

1  
2  
3 **Acknowledgements:** We would like to thank Julie Robotham (PHE) for her expert guidance  
4 as well as the hospitals who contributed information on the cost of microbiological screening  
5 and surveillance resources.  
6  
7  
8

9  
10 We would also like to thank NHS Digital for permission to reuse Hospital Episode Statistics  
11 (HES), Copyright NHS Digital © 2010. All rights reserved.  
12  
13

14  
15 **Contributors:** CW and TL designed the study. CW, JC, PH and ES sourced cost data. CW  
16 analysed the cost data, constructed the initial cost model and wrote the paper. NG  
17 conducted the paired matching analysis and AJVH calculated uncertainty and advised on the  
18 model construction and JW designed the multi-centre study. All authors critically reviewed  
19 and contributed to the final draft of the paper. TL is the guarantor.  
20  
21  
22  
23  
24  
25

26  
27 **Funding:** This research received no specific grant from any funding agency in the public,  
28 commercial or not-for-profit sectors  
29  
30

31  
32 **Competing interests:** None declared  
33  
34

35 **Ethical approval:** Not needed for this type of study. Public Health England has approval  
36 from the Confidentiality Advisory Group of the Health Research Authority for the processing  
37 of confidential patient information in support of the PHE Surgical Site Infection Surveillance  
38 Service through its devolved responsibility under Regulation 3 of the Health Service (Control  
39 of Patient Information) Regulations of 2002 (made under the powers given to the Secretary  
40 of State in Section 251, NHS Act 2006). Regulation 3: Surveillance and control of public  
41 health hazards explicitly including infectious disease.  
42  
43  
44  
45  
46  
47  
48  
49

50  
51 **Patient consent for publication:** Not required  
52

53  
54 **Provenance and peer review:** Not commissioned; externally peer reviewed  
55

56  
57 **Data availability statement:** No additional data available  
58  
59  
60

## Figure Legends

**Figure 1.** Change in surgical site infection (SSI) risk between consecutive 3 month surveillance periods for 7 hospitals during the multi-centre caesarean section study

**Figure 2.** Balance of surveillance cost versus savings from reductions of 10, 20 and 30% per surveillance period for surveillance strategies of one quarter a year, two quarters a year and continuous surveillance for starting surgical site infection (SSI) risk of 5%

**Figure 3.** Balance of surveillance cost versus savings from reductions of 10, 20 and 30% per surveillance period for surveillance strategies of one quarter a year, two quarters a year and continuous surveillance for starting surgical site infection (SSI) risk of 10%

**Figure 4.** Balance of surveillance cost versus savings from reductions of 10, 20 and 30% per surveillance period for surveillance strategies of one quarter a year, two quarters a year and continuous surveillance for starting surgical site infection (SSI) risk of 15%

**Figure 5.** Balance of surveillance cost versus savings from reductions in surgical site infection risk of 10, 20 and 30% per surveillance period for baseline surgical site infection (SSI) risk of 10 or 15% using a variable surveillance strategy (continuous surveillance when the infection risk is above 10%, two quarters per year surveillance for infection risk between 5 and 10% and one quarter per year surveillance for infection risk below 5%)

**Figure 6.** Cumulative discounted prevented costs against costs of surveillance after 5-year surveillance programme - 15% Baseline surgical site infection risk

**Figure 7.** Cumulative discounted prevented costs against costs of surveillance after 5-year surveillance programme - 10% Baseline surgical site infection risk

**Figure 8.** Cumulative discounted prevented costs against costs of surveillance after 5-year surveillance programme - 5% Baseline surgical site infection risk

## References

1. OECD. Health at a Glance 2017: OECD Indicators. *OECD* 2018 .  
[https://www.oecd-ilibrary.org/social-issues-migration-health/health-at-a-glance-2017\\_health\\_glance-2017-en](https://www.oecd-ilibrary.org/social-issues-migration-health/health-at-a-glance-2017_health_glance-2017-en) (accessed 9/14/2018).
2. NHS Digital. NHS Maternity Statistics, England 2018-19. *NHS Digital* 2019 .  
<https://digital.nhs.uk/data-and-information/publications/statistical/nhs-maternity-statistics/2018-19> (accessed 29/04/2020).
3. Ward VP, Charlett A, Fagan J, et al. Enhanced surgical site infection surveillance following caesarean section: experience of a multicentre collaborative post-discharge system. *J Hosp Infect* 2008;70(2):166-73.
4. Johnson A, Young D, Reilly J. Caesarean section surgical site infection surveillance. *J Hosp Infect* 2006;64(1):30-35.
5. Caesarean-section surgical site infection surveillance. Annual report: all Wales. *Public Health Wales* 2017.  
[http://www2.nphs.wales.nhs.uk:8080/WHAIPDocs.nsf/3dc04669c9e1eaa880257062003b246b/5b9c050161b447408025821100359f6f/\\$FILE/2016%20All%20Wales%20SSI%20Annual%20Report%20-%20V1.pdf](http://www2.nphs.wales.nhs.uk:8080/WHAIPDocs.nsf/3dc04669c9e1eaa880257062003b246b/5b9c050161b447408025821100359f6f/$FILE/2016%20All%20Wales%20SSI%20Annual%20Report%20-%20V1.pdf) (accessed 6/12/2018).
6. Wloch C, Wilson J, Lamagni T, et al. Risk factors for surgical site infection following caesarean section in England: results from a multicentre cohort study. *BJOG* 2012;119(11):1324-33. doi: 10.1111/j.1471-0528.2012.03452.x [doi]
7. Cantwell R, Clutton-Brock T, Cooper G, et al. Saving Mothers' Lives: Reviewing maternal deaths to make motherhood safer: 2006-2008. The Eighth Report of the Confidential Enquiries into Maternal Deaths in the United Kingdom. *BJOG* 2011;118(Suppl 1):1-203.
8. Haley RW, Culver DH, White JW, et al. The efficacy of infection surveillance and control programs in preventing nosocomial infections in US hospitals. *Am J Epidemiol* 1985;121(2):182-205.
9. Gastmeier P, Geffers C, Brandt C, et al. Effectiveness of a nationwide nosocomial infection surveillance system for reducing nosocomial infections. *J Hosp Infect* 2006;64(1):16-22.
10. Abbas M, de Kraker MEA, Aghayev E, et al. Impact of participation in a surgical site infection surveillance network: results from a large international cohort study. *J Hosp Infect* 2019;102(3):267-76. doi: 10.1016/j.jhin.2018.12.003
11. Wilson J, Wloch C, Saei A, et al. Inter-hospital comparison of rates of surgical site infection following caesarean section delivery: evaluation of a multicentre surveillance study. *J Hosp Infect* 2013;84(1):44-51. doi: S0195-6701(13)00051-0 [pii];10.1016/j.jhin.2013.01.009 [doi]
12. Department of Health. 2010-11 reference costs publication. *Department of Health* 2018. <https://www.gov.uk/government/publications/2010-11-reference-costs-publication> (accessed 7/25/2018).

13. Business Services Authority. NHS Drugs Tariff. *Business Services Authority* 2018. <https://www.nhsbsa.nhs.uk/pharmacies-gp-practices-and-appliance-contractors/drug-tariff> (accessed 7/25/2018).
14. National Institute for Health and Care Excellence. Guide to methods of technology appraisal 2013. <https://www.nice.org.uk/process/pmg9/chapter/foreword> (accessed 7/6/2017).
15. Dyrkorn OA, Kristoffersen M, Walberg M. Reducing post-caesarean surgical wound infection rate: an improvement project in a Norwegian maternity clinic. *BMJ Qual Saf* 2012;21(3):206-10. doi: bmjqs-2011-000316 [pii];10.1136/bmjqs-2011-000316 [doi]
16. Corcoran S, Jackson V, Coulter-Smith S, et al. Surgical site infection after cesarean section: implementing 3 changes to improve the quality of patient care. *Am J Infect Control* 2013;41(12):1258-63. doi: S0196-6553(13)00892-4 [pii];10.1016/j.ajic.2013.04.020 [doi]
17. European Centre for Disease Prevention and Control. Surveillance of surgical site infections in Europe, 2010-2011. *European Centre for Disease Prevention and Control* 2013. <https://www.ecdc.europa.eu/en/publications-data/surveillance-surgical-site-infections-europe-2010-2011> (accessed 12/03/2020)
18. OECD. Inflation (CPI)(Indicator). *OECD* 2020. <https://data.oecd.org/price/inflation-cpi.htm> (accessed 29/04/2019).
19. Kappstein I, Schulgen G, Beyer U, et al. Prolongation of hospital stay and extra costs due to ventilator-associated pneumonia in an intensive care unit. *Eur J Clin Microbiol Infect Dis* 1992;11(6):504-08.
20. De AG, Murthy A, Beyersmann J, et al. Estimating the impact of healthcare-associated infections on length of stay and costs. *Clin Microbiol Infect* 2010;16(12):1729-35. doi: CLM3332 [pii];10.1111/j.1469-0691.2010.03332.x [doi]
21. Jenks PJ, Laurent M, McQuarry S, et al. Clinical and economic burden of surgical site infection (SSI) and predicted financial consequences of elimination of SSI from an English hospital. *J Hosp Infect* 2014;86(1):24-33. doi: S0195-6701(13)00344-7 [pii];10.1016/j.jhin.2013.09.012 [doi]
22. Olsen MA, Butler AM, Willers DM, et al. Attributable costs of surgical site infection and endometritis after low transverse cesarean delivery. *Infect Control Hosp Epidemiol* 2010;31(3):276-82.
23. Mugford M, Kingston J, Chalmers I. Reducing the incidence of infection after caesarean section: implications of prophylaxis with antibiotics for hospital resources. *BMJ* 1989;299(6706):1003-06.
24. Tanner J, Khan D, Ball J, et al. The rate, risk factors and cost of surgical site infection in primary breast surgery. *Journal of Infection Prevention* 2011;12(5):204-09. doi: 10.1177/1757177411411123
25. Reilly J, Twaddle S, McIntosh J, et al. An economic analysis of surgical wound infection. *J Hosp Infect* 2001;49(4):245-49.

- 1
  - 2
  - 3
  - 4
  - 5
  - 6
  - 7
  - 8
  - 9
  - 10
  - 11
  - 12
  - 13
  - 14
  - 15
  - 16
  - 17
  - 18
  - 19
  - 20
  - 21
  - 22
  - 23
  - 24
  - 25
  - 26
  - 27
  - 28
  - 29
  - 30
  - 31
  - 32
  - 33
  - 34
  - 35
  - 36
  - 37
  - 38
  - 39
  - 40
  - 41
  - 42
  - 43
  - 44
  - 45
  - 46
  - 47
  - 48
  - 49
  - 50
  - 51
  - 52
  - 53
  - 54
  - 55
  - 56
  - 57
  - 58
  - 59
  - 60
26. Kealy MA, Small RE, Liamputtong P. Recovery after caesarean birth: a qualitative study of women's accounts in Victoria, Australia. *BMC Pregnancy Childbirth* 2010;10:47.
27. Barwolff S, Sohr D, Geffers C, et al. Reduction of surgical site infections after Caesarean delivery using surveillance. *J Hosp Infect* 2006;64(2):156-61.
28. Astagneau P, L'Heriteau F, Daniel F, et al. Reducing surgical site infection incidence through a network: results from the French ISO-RAISIN surveillance system. *J Hosp Infect* 2009;72(2):127-34.
29. Gregson H. Reducing surgical site infection following caesarean section. *Nurs Stand* 2011;25(50):35-40.
30. National Collaborating Centre for Women's and Children's Health. Surgical site infection - prevention and treatment of surgical site infection. Clinical Guideline 74. *NICE* 2008. <http://www.nice.org.uk/guidance/CG74> (accessed 10/23/2015).
31. World Health Organisation. Global guidelines for the prevention of surgical site infection. 2016. <http://www.who.int/gpsc/ssi-guidelines/en/> (accessed 7/6/2017).
32. National Institute for Health and Care Excellence. Hypothermia: prevention and management in adults having surgery, CG65. 2016. <https://www.nice.org.uk/guidance/cg65> (accessed 7/6/2017).
33. Public Health England. Surveillance of surgical site infections in NHS hospitals in England 2015/16. *Public Health England* 2016. <https://www.gov.uk/government/publications/surgical-site-infections-ssi-surveillance-nhs-hospitals-in-england>. (accessed 12/03/2020)
34. Health Survey for England, 2016. *NHS Digital* 2017. <https://digital.nhs.uk/data-and-information/publications/statistical/health-survey-for-england/health-survey-for-england-2016>. (accessed 12/03/2020)
35. Scotland HP. Pan Celtic Collaborative Surgical Site Infection Surveillance Report: Surveillance of surgical site infection for caesarean section procedures performed in Northern Ireland, Scotland and Wales in 2008: Health Protection Scotland; 2014. <https://www.hps.scot.nhs.uk/web-resources-container/pan-celtic-collaborative-surgical-site-infection-surveillance-report-surveillance-of-surgical-site-infection-for-caesarean-section-procedures-performed-in-northern-ireland-scotland-and-wales-in-2008> accessed 12/03/2020.
36. Godbole G, Wloch C, Harrington P, et al. Future priorities of acute hospitals for surgical site infection surveillance in England. *J Hosp Infect* 2018 doi: S0195-6701(18)30330-X [pii];10.1016/j.jhin.2018.06.016 [doi]
37. Coello R, Charlett A, Wilson J, et al. Adverse impact of surgical site infections in English hospitals. *J Hosp Infect* 2005;60(2):93-103.
38. Merollini KM, Crawford RW, Whitehouse SL, et al. Surgical site infection prevention following total hip arthroplasty in Australia: a cost-effectiveness analysis. *Am J Infect Control* 2013;41(9):803-09. doi: S0196-6553(13)00054-0 [pii];10.1016/j.ajic.2012.11.015 [doi]

- 1  
2  
3 39. Badia JM, Casey AL, Petrosillo N, et al. Impact of surgical site infection on  
4 healthcare costs and patient outcomes: a systematic review in six European  
5 countries. *J Hosp Infect* 2017;96(1):1-15. doi: S0195-6701(17)30135-4  
6 [pii];10.1016/j.jhin.2017.03.004 [doi]  
7  
8 40. Vanhegan IS, Malik AK, Jayakumar P, et al. A financial analysis of revision hip  
9 arthroplasty: the economic burden in relation to the national tariff. *J Bone Joint*  
10 *Surg Br* 2012;94(5):619-23. doi: 10.1302/0301-620X.94B5.27073 [published  
11 Online First: 2012/04/25]  
12  
13 41. Schumacher H, Tehrani H, Irwin MS, et al. Abdominoplasty as an adjunct to the  
14 management of peri-Caesarian section necrotising fasciitis. *J Plast Reconstr*  
15 *Aesthet Surg* 2008;61(7):807-10. doi: S1748-6815(07)00153-2  
16 [pii];10.1016/j.bjps.2005.11.048 [doi]  
17  
18 42. Melendez J, Claxton A, Erskine K. MRSA bacteraemia after caesarean section  
19 wound infection: when screening is missed and things go wrong. *Arch*  
20 *Gynecol Obstet* 2012;285(3):663-65. doi: 10.1007/s00404-011-2066-8 [doi]  
21  
22 43. National Audit Office. Managing the costs of clinical negligence in trusts. *National*  
23 *Audit Office* 2017. [https://www.nao.org.uk/report/managing-the-costs-of-](https://www.nao.org.uk/report/managing-the-costs-of-clinical-negligence-in-trusts/)  
24 [clinical-negligence-in-trusts/](https://www.nao.org.uk/report/managing-the-costs-of-clinical-negligence-in-trusts/) (accessed 11/1/2018).  
25  
26  
27  
28  
29  
30  
31  
32  
33  
34  
35  
36  
37  
38  
39  
40  
41  
42  
43  
44  
45  
46  
47  
48  
49  
50  
51  
52  
53  
54  
55  
56  
57  
58  
59  
60



**Figure 1.** Change in surgical site infection (SSI) risk between consecutive 3 month surveillance periods for 7 hospitals during the multi-centre caesarean section study



**Figure 2.** Balance of surveillance cost versus savings from reductions of 10, 20 and 30% per surveillance period for surveillance strategies of one quarter a year, two quarters a year and continuous surveillance for starting surgical site infection (SSI) risk of 5%

Model assumes reductions in infection risk are achieved in conjunction with improvement programmes during surveillance periods and maintained between each surveillance period. No further reductions in risk of infection were included in the model once a postulated minimum SSI risk of 3% was reached.

**Key:** Surveillance strategy      Reductions in SSI risk



i) SSI risk (%)

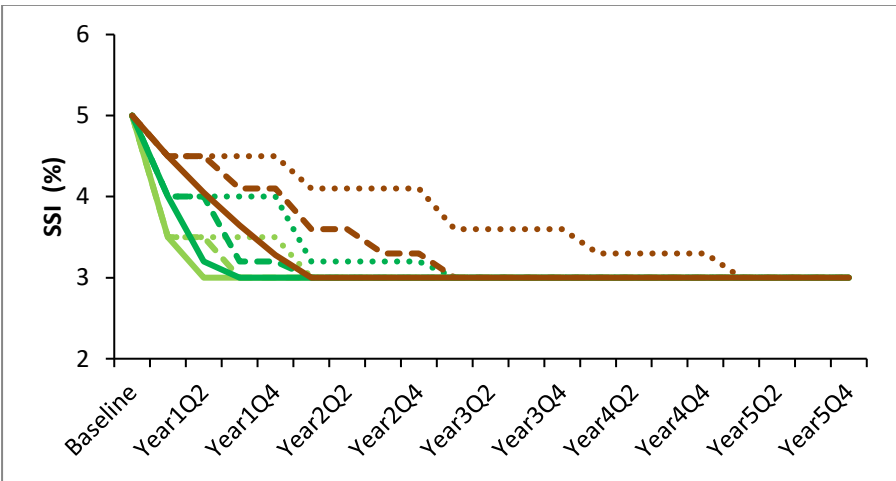

ii) balance of discounted cost versus savings

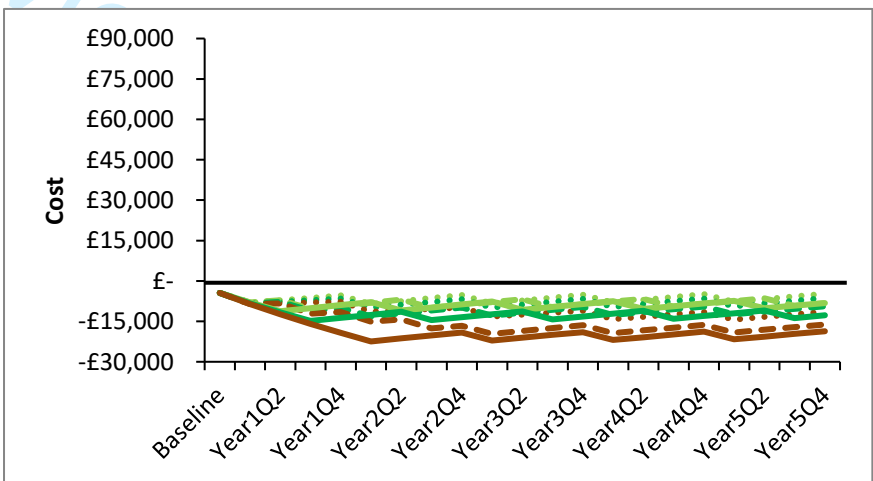

**Figure 3.** Balance of surveillance cost versus savings from reductions of 10, 20 and 30% per surveillance period for surveillance strategies of one quarter a year, two quarters a year and continuous surveillance for starting surgical site infection (SSI) risk of 10%

Model assumes reductions in infection risk are achieved in conjunction with improvement programmes during surveillance periods and maintained between each surveillance period. No further reductions in risk of infection were included in the model once a postulated minimum SSI risk of 3% was reached.

**Key:** Surveillance strategy      Reductions in SSI risk

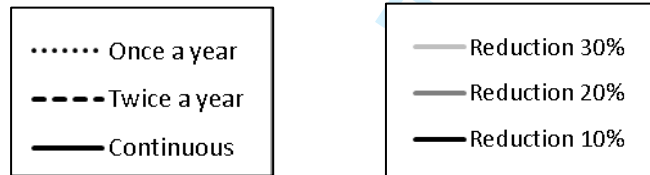

i) SSI risk (%)

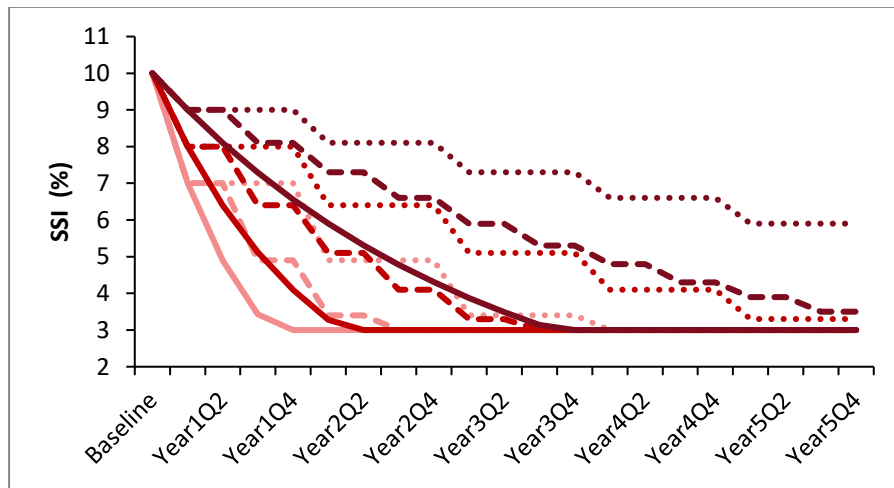

ii) balance of discounted cost versus savings

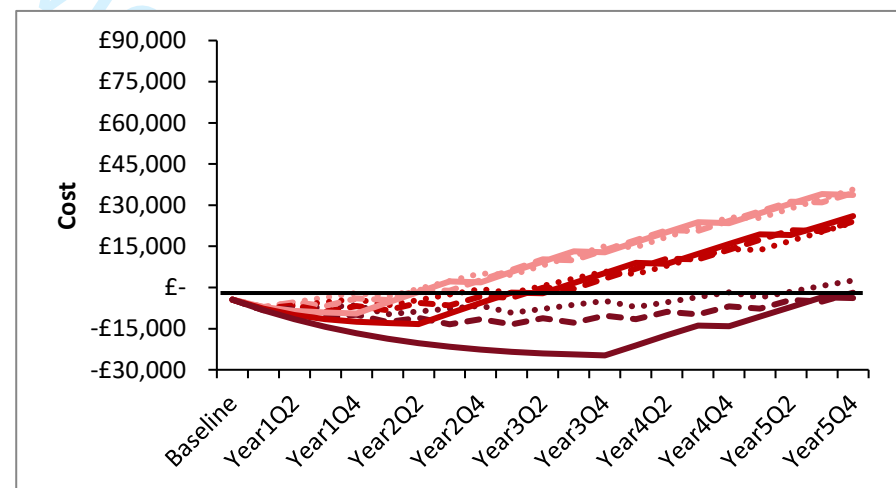

**Figure 4.** Balance of surveillance cost versus savings from reductions of 10, 20 and 30% per surveillance period for surveillance strategies of one quarter a year, two quarters a year and continuous surveillance for starting surgical site infection (SSI) risk of 15%

Model assumes reductions in infection risk are achieved in conjunction with improvement programmes during surveillance periods and maintained between each surveillance period. No further reductions in risk of infection were included in the model once a postulated minimum SSI risk of 3% was reached.

**Key:** Surveillance strategy      Reductions in SSI risk



i) SSI risk (%)

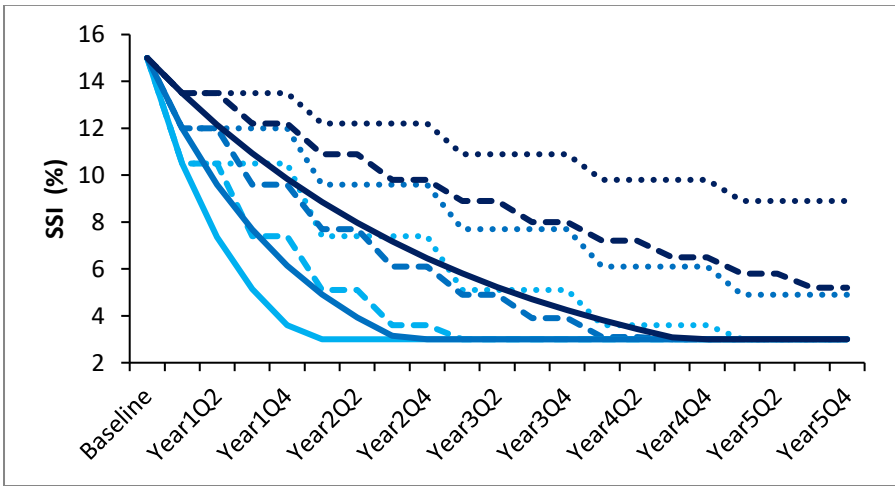

ii) balance of discounted cost versus savings

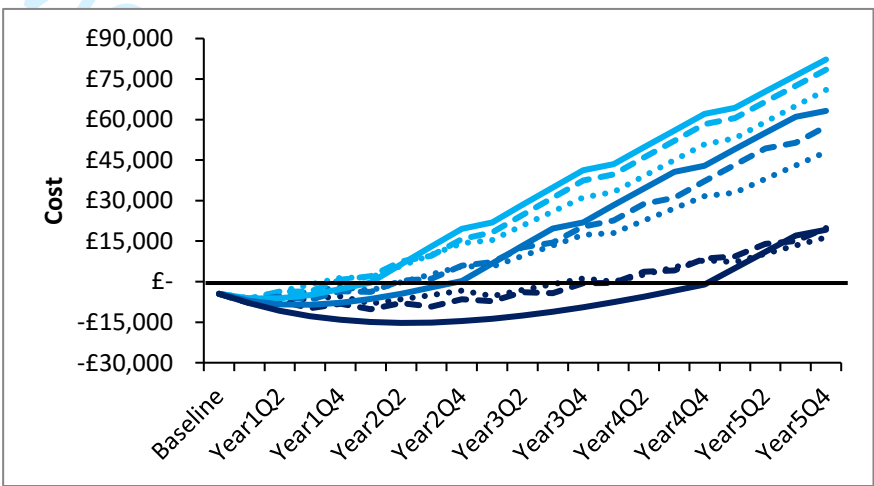

**Figure 5.** Balance of surveillance cost versus savings from reductions in surgical site infection risk of 10, 20 and 30% per surveillance period for baseline surgical site infection (SSI) risk of 10 or 15% using a variable surveillance strategy (continuous surveillance when the infection risk is above 10%, two quarters per year surveillance for infection risk between 5 and 10% and one quarter per year surveillance for infection risk below 5%)

Model assumes reductions in risk of infection are achieved in conjunction with improvement programmes during surveillance periods and maintained between each surveillance period. No further reductions in risk of infection were included once a postulated minimum SSI risk of 3% was reached.

Key: Reductions in risk      Baseline SSI risk



i) SSI risk (%)

ii) balance of discounted cost versus savings

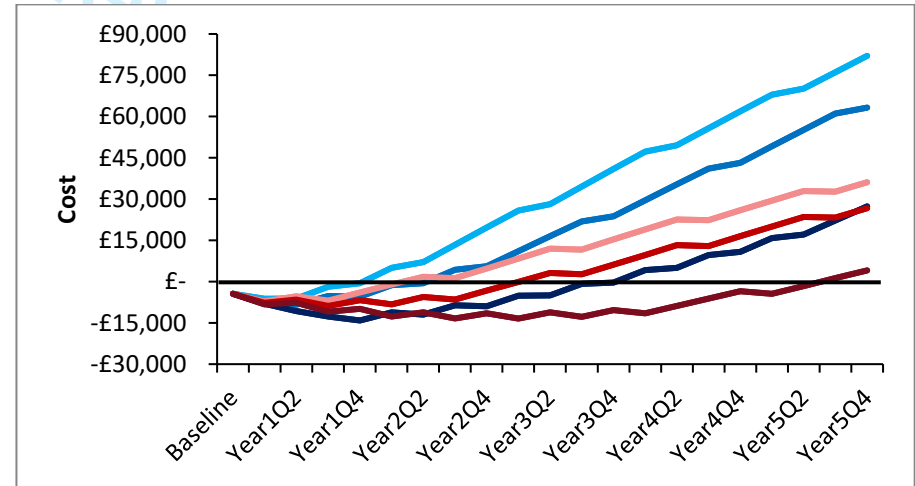

**Figure 6.** Cumulative discounted prevented costs against costs of surveillance after 5-year surveillance programme – 15% baseline surgical site infection risk

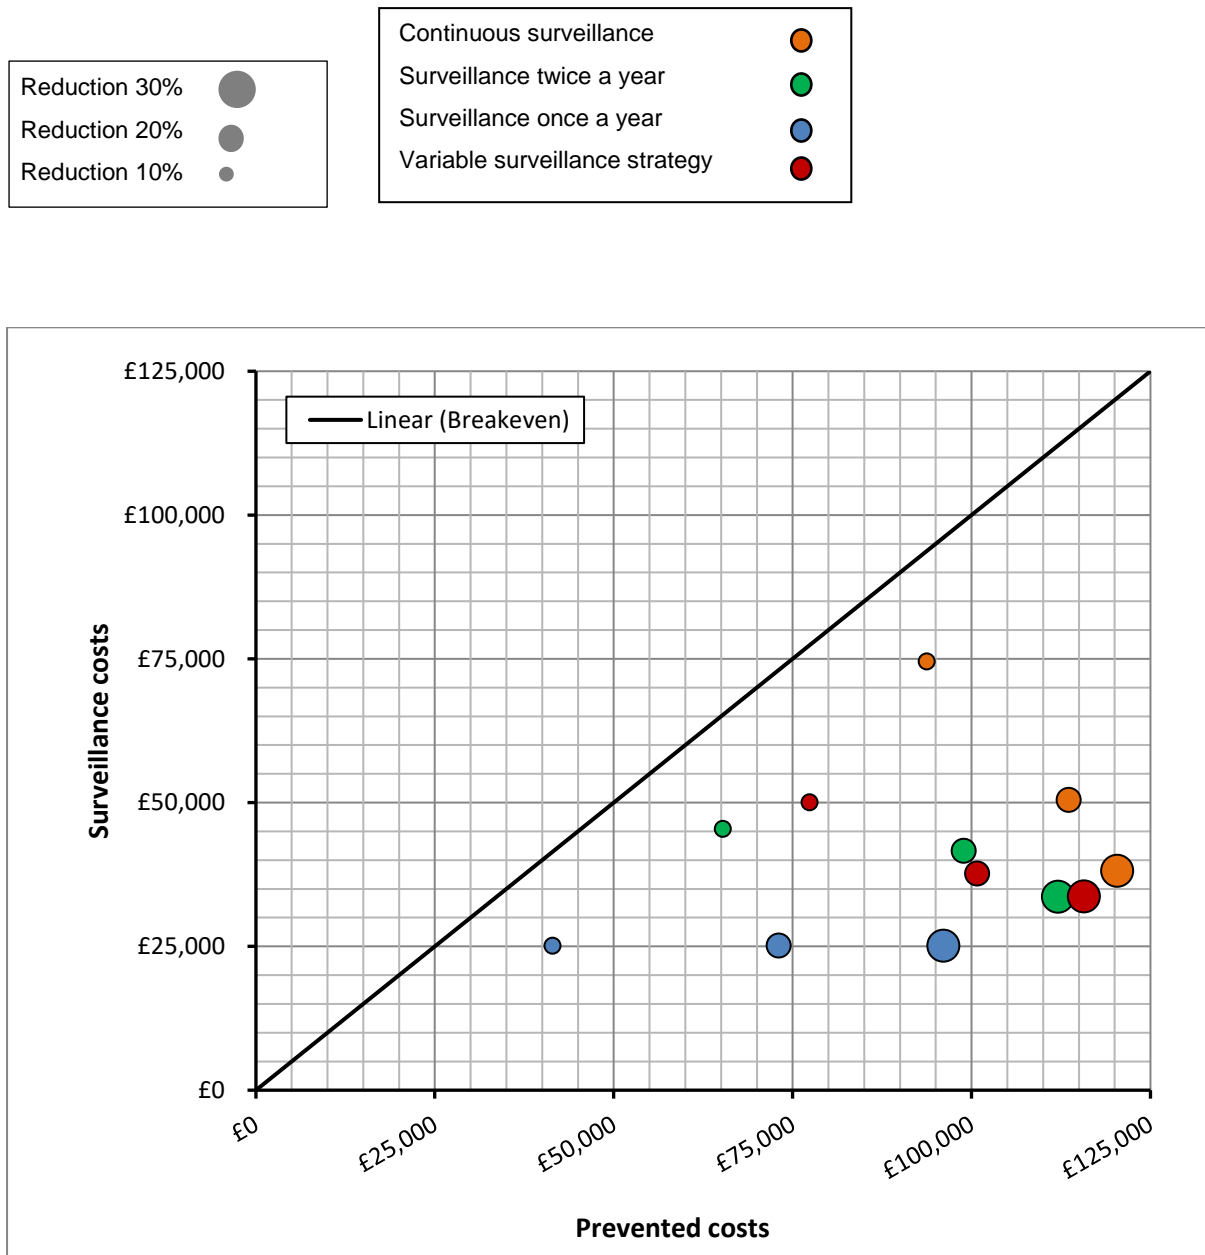

**Figure 7.** Cumulative discounted prevented costs against costs of surveillance after 5-year surveillance programme – 10% baseline surgical site infection risk

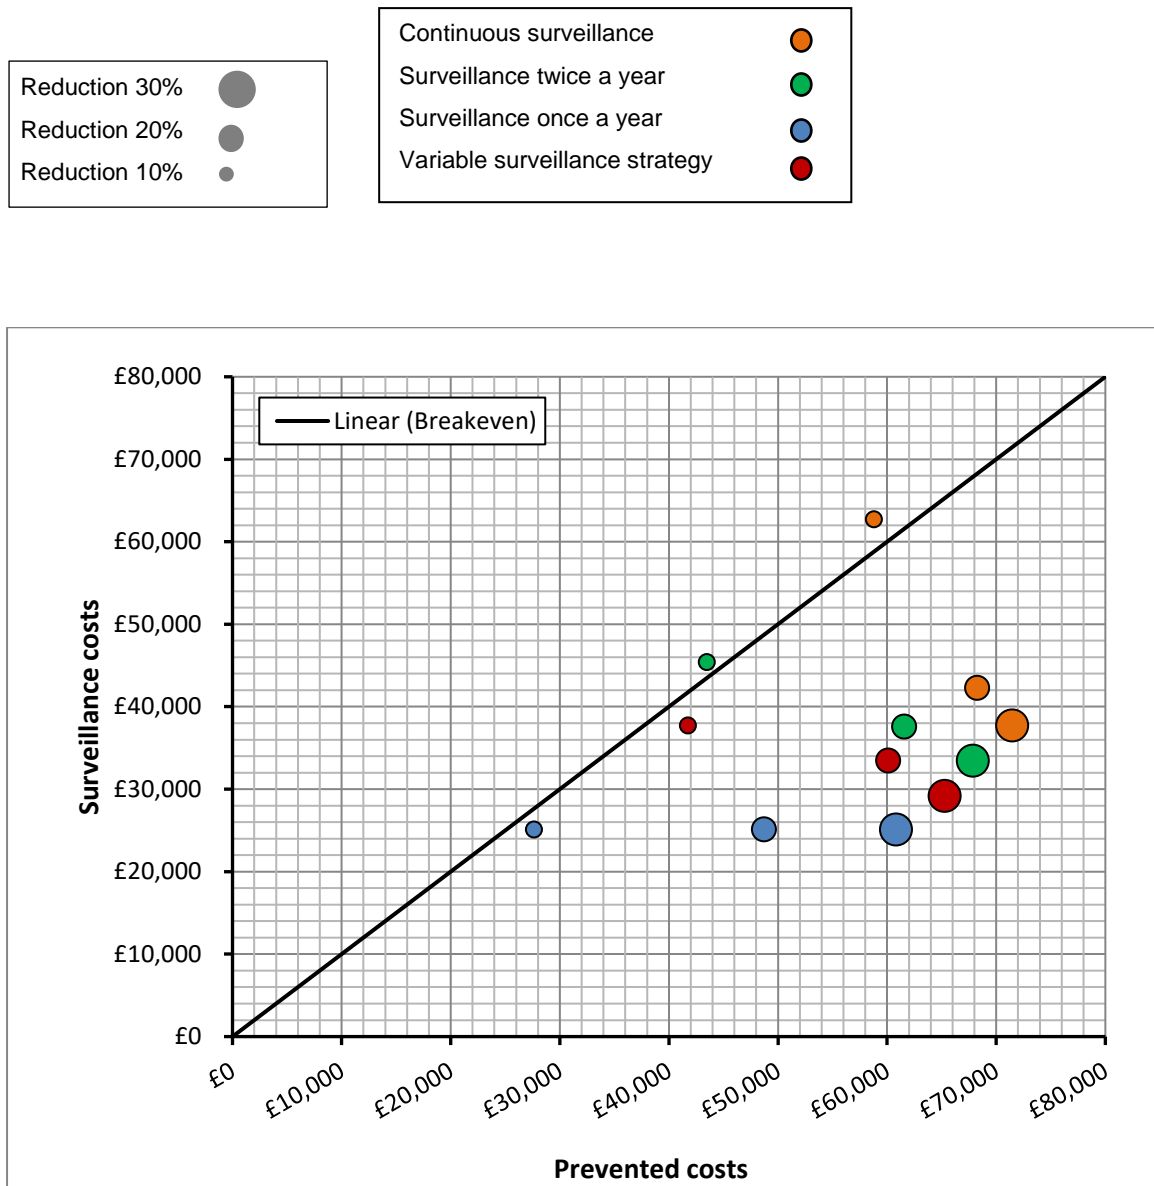

**Figure 8.** Cumulative discounted prevented costs against costs of surveillance after 5-year surveillance programme – 5% baseline surgical site infection risk

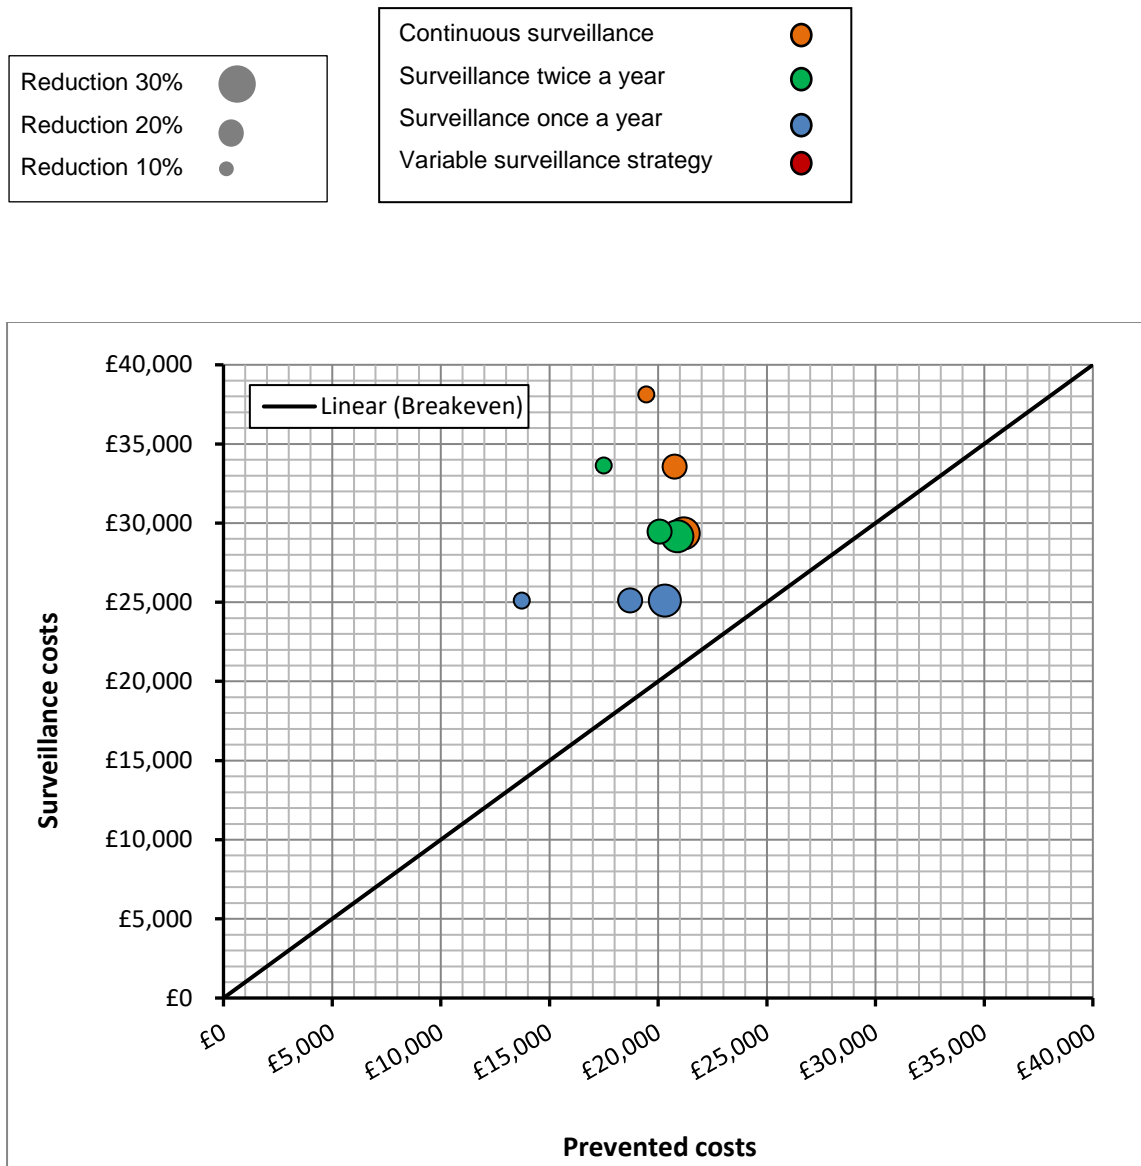

\*Variable surveillance strategy is equivalent to once-a-year surveillance where SSI risk is <5%





|                                 |       |
|---------------------------------|-------|
| No. C-section per year          | 800   |
| Baseline SSI rate (>3.0%)       | 10    |
| Reduction SSI due to action (%) | 20%   |
| Discounting                     | 3.50% |

|                                |         |
|--------------------------------|---------|
| Quarterly cost surveillance    | £4,439  |
| cost per 1% SSI rate           | £2,337  |
| Total cost of disease per year | £23,367 |

**Years until cost-saving**

**3.375**

999= more than 25 years

1  
2  
3  
4  
5  
6  
7  
8  
9  
10  
11  
12  
13  
14  
15  
16  
17  
18  
19  
20  
21  
22  
23  
24  
25  
26  
27  
28  
29  
30  
31  
32  
33  
34  
35  
36  
37  
38  
39  
40  
41  
42  
43  
44  
45  
46

| Period   | Discounting | Total cost of disease per quarter | Total costs discounted | SSI rate reduction (%) | SSI rate reduction to 3% minimum (%) | Quarterly cost of surveillance | Quarterly costs of surveillance discounted | New total costs after reduction SSI | New total cost discounted | Prevented costs | Prevented costs discounted |
|----------|-------------|-----------------------------------|------------------------|------------------------|--------------------------------------|--------------------------------|--------------------------------------------|-------------------------------------|---------------------------|-----------------|----------------------------|
| Baseline | 0           | £5,842                            | £5,842                 | 10.00                  | 10.0                                 | £4,439                         | £4,439                                     | £ 5,841.85                          | £ 5,841.85                | £ -             | £ -                        |
| Year1Q1  | 0.125       | £5,842                            | £5,817                 | 8.00                   | 8.0                                  | £4,439                         | £4,420                                     | £ 4,673.48                          | £ 4,653.43                | £ 1,168.37      | £ 1,163.36                 |
| Year1Q2  | 0.375       | £5,842                            | £5,767                 | 8.00                   | 8.0                                  | £0                             | £0                                         | £ 4,673.48                          | £ 4,613.58                | £ 1,168.37      | £ 1,153.39                 |
| Year1Q3  | 0.625       | £5,842                            | £5,718                 | 6.40                   | 6.4                                  | £4,439                         | £4,345                                     | £ 3,738.78                          | £ 3,659.25                | £ 2,103.07      | £ 2,058.33                 |
| Year1Q4  | 0.875       | £5,842                            | £5,669                 | 6.40                   | 6.4                                  | £0                             | £0                                         | £ 3,738.78                          | £ 3,627.92                | £ 2,103.07      | £ 2,040.70                 |
| Year2Q1  | 1.125       | £5,842                            | £5,620                 | 5.12                   | 5.1                                  | £4,439                         | £4,270                                     | £ 2,991.03                          | £ 2,877.48                | £ 2,850.82      | £ 2,742.60                 |
| Year2Q2  | 1.375       | £5,842                            | £5,572                 | 5.12                   | 5.1                                  | £0                             | £0                                         | £ 2,991.03                          | £ 2,852.84                | £ 2,850.82      | £ 2,719.11                 |
| Year2Q3  | 1.625       | £5,842                            | £5,524                 | 4.10                   | 4.1                                  | £4,439                         | £4,198                                     | £ 2,392.82                          | £ 2,262.73                | £ 3,449.03      | £ 3,261.51                 |
| Year2Q4  | 1.875       | £5,842                            | £5,477                 | 4.10                   | 4.1                                  | £0                             | £0                                         | £ 2,392.82                          | £ 2,243.35                | £ 3,449.03      | £ 3,233.58                 |
| Year3Q1  | 2.125       | £5,842                            | £5,430                 | 4.10                   | 4.1                                  | £0                             | £0                                         | £ 2,392.82                          | £ 2,224.14                | £ 3,449.03      | £ 3,205.89                 |
| Year3Q2  | 2.375       | £5,842                            | £5,384                 | 4.10                   | 4.1                                  | £0                             | £0                                         | £ 2,392.82                          | £ 2,205.09                | £ 3,449.03      | £ 3,178.44                 |
| Year3Q3  | 2.625       | £5,842                            | £5,337                 | 3.28                   | 3.3                                  | £4,439                         | £4,056                                     | £ 1,914.26                          | £ 1,748.97                | £ 3,927.59      | £ 3,588.46                 |
| Year3Q4  | 2.875       | £5,842                            | £5,292                 | 3.28                   | 3.3                                  | £0                             | £0                                         | £ 1,914.26                          | £ 1,733.99                | £ 3,927.59      | £ 3,557.73                 |
| Year4Q1  | 3.125       | £5,842                            | £5,246                 | 3.3                    | 3.3                                  | £0                             | £0                                         | £ 1,914.26                          | £ 1,719.14                | £ 3,927.59      | £ 3,527.26                 |
| Year4Q2  | 3.375       | £5,842                            | £5,201                 | 3.3                    | 3.3                                  | £0                             | £0                                         | £ 1,914.26                          | £ 1,704.42                | £ 3,927.59      | £ 3,497.06                 |
| Year4Q3  | 3.625       | £5,842                            | £5,157                 | 2.6                    | 3.0                                  | £4,439                         | £3,919                                     | £ 1,752.56                          | £ 1,547.08                | £ 4,089.30      | £ 3,609.85                 |
| Year4Q4  | 3.875       | £5,842                            | £5,113                 | 2.6                    | 3.0                                  | £0                             | £0                                         | £ 1,752.56                          | £ 1,533.83                | £ 4,089.30      | £ 3,578.94                 |
| Year5Q1  | 4.125       | £5,842                            | £5,069                 | 2.6                    | 3.0                                  | £0                             | £0                                         | £ 1,752.56                          | £ 1,520.70                | £ 4,089.30      | £ 3,548.29                 |
| Year5Q2  | 4.375       | £5,842                            | £5,026                 | 2.6                    | 3.0                                  | £0                             | £0                                         | £ 1,752.56                          | £ 1,507.67                | £ 4,089.30      | £ 3,517.91                 |
| Year5Q3  | 4.625       | £5,842                            | £4,983                 | 2.1                    | 3.0                                  | £4,439                         | £3,786                                     | £ 1,752.56                          | £ 1,494.76                | £ 4,089.30      | £ 3,487.78                 |
| Year5Q4  | 4.875       | £5,842                            | £4,940                 | 2.1                    | 3.0                                  | £0                             | £0                                         | £ 1,752.56                          | £ 1,481.96                | £ 4,089.30      | £ 3,457.91                 |
| Year6Q1  | 5.125       | £5,842                            | £4,898                 | 2.1                    | 3.0                                  | £0                             | £0                                         | £ 1,752.56                          | £ 1,469.27                | £ 4,089.30      | £ 3,428.30                 |
| Year6Q2  | 5.375       | £5,842                            | £4,856                 | 2.1                    | 3.0                                  | £0                             | £0                                         | £ 1,752.56                          | £ 1,456.69                | £ 4,089.30      | £ 3,398.94                 |
| Year6Q3  | 5.625       | £5,842                            | £4,814                 | 1.7                    | 3.0                                  | £4,439                         | £3,658                                     | £ 1,752.56                          | £ 1,444.22                | £ 4,089.30      | £ 3,369.84                 |
| Year6Q4  | 5.875       | £5,842                            | £4,773                 | 1.7                    | 3.0                                  | £0                             | £0                                         | £ 1,752.56                          | £ 1,431.85                | £ 4,089.30      | £ 3,340.98                 |
| Year7Q1  | 6.125       | £5,842                            | £4,732                 | 1.7                    | 3.0                                  | £0                             | £0                                         | £ 1,752.56                          | £ 1,419.59                | £ 4,089.30      | £ 3,312.37                 |
| Year7Q2  | 6.375       | £5,842                            | £4,691                 | 1.7                    | 3.0                                  | £0                             | £0                                         | £ 1,752.56                          | £ 1,407.43                | £ 4,089.30      | £ 3,284.00                 |
| Year7Q3  | 6.625       | £5,842                            | £4,651                 | 1.3                    | 3.0                                  | £4,439                         | £3,534                                     | £ 1,752.56                          | £ 1,395.38                | £ 4,089.30      | £ 3,255.88                 |
| Year7Q4  | 6.875       | £5,842                            | £4,611                 | 1.3                    | 3.0                                  | £0                             | £0                                         | £ 1,752.56                          | £ 1,383.43                | £ 4,089.30      | £ 3,228.00                 |

|    |          |        |        |        |     |     |        |        |   |          |   |          |   |          |   |          |
|----|----------|--------|--------|--------|-----|-----|--------|--------|---|----------|---|----------|---|----------|---|----------|
| 1  |          |        |        |        |     |     |        |        |   |          |   |          |   |          |   |          |
| 2  | Year8Q1  | 7.125  | £5,842 | £4,572 | 1.3 | 3.0 | £0     | £0     | £ | 1,752.56 | £ | 1,371.58 | £ | 4,089.30 | £ | 3,200.36 |
| 3  | Year8Q2  | 7.375  | £5,842 | £4,533 | 1.3 | 3.0 | £0     | £0     | £ | 1,752.56 | £ | 1,359.84 | £ | 4,089.30 | £ | 3,172.95 |
| 4  | Year8Q3  | 7.625  | £5,842 | £4,494 | 1.1 | 3.0 | £4,439 | £3,415 | £ | 1,752.56 | £ | 1,348.19 | £ | 4,089.30 | £ | 3,145.78 |
| 5  | Year8Q4  | 7.875  | £5,842 | £4,455 | 1.1 | 3.0 | £0     | £0     | £ | 1,752.56 | £ | 1,336.65 | £ | 4,089.30 | £ | 3,118.84 |
| 6  | Year9Q1  | 8.125  | £5,842 | £4,417 | 1.1 | 3.0 | £0     | £0     | £ | 1,752.56 | £ | 1,325.20 | £ | 4,089.30 | £ | 3,092.13 |
| 7  | Year9Q2  | 8.375  | £5,842 | £4,380 | 1.1 | 3.0 | £0     | £0     | £ | 1,752.56 | £ | 1,313.85 | £ | 4,089.30 | £ | 3,065.65 |
| 8  | Year9Q3  | 8.625  | £5,842 | £4,342 | 0.9 | 3.0 | £4,439 | £3,299 | £ | 1,752.56 | £ | 1,302.60 | £ | 4,089.30 | £ | 3,039.40 |
| 9  | Year9Q4  | 8.875  | £5,842 | £4,305 | 0.9 | 3.0 | £0     | £0     | £ | 1,752.56 | £ | 1,291.45 | £ | 4,089.30 | £ | 3,013.37 |
| 10 | Year10Q1 | 9.125  | £5,842 | £4,268 | 0.9 | 3.0 | £0     | £0     | £ | 1,752.56 | £ | 1,280.39 | £ | 4,089.30 | £ | 2,987.57 |
| 11 | Year10Q2 | 9.375  | £5,842 | £4,231 | 0.9 | 3.0 | £0     | £0     | £ | 1,752.56 | £ | 1,269.42 | £ | 4,089.30 | £ | 2,961.98 |
| 12 | Year10Q3 | 9.625  | £5,842 | £4,195 | 0.7 | 3.0 | £4,439 | £3,188 | £ | 1,752.56 | £ | 1,258.55 | £ | 4,089.30 | £ | 2,936.62 |
| 13 | Year10Q4 | 9.875  | £5,842 | £4,159 | 0.7 | 3.0 | £0     | £0     | £ | 1,752.56 | £ | 1,247.77 | £ | 4,089.30 | £ | 2,911.47 |
| 14 | Year11Q1 | 10.125 | £5,842 | £4,124 | 0.7 | 3.0 | £0     | £0     | £ | 1,752.56 | £ | 1,237.09 | £ | 4,089.30 | £ | 2,886.54 |
| 15 | Year11Q2 | 10.375 | £5,842 | £4,088 | 0.7 | 3.0 | £0     | £0     | £ | 1,752.56 | £ | 1,226.49 | £ | 4,089.30 | £ | 2,861.82 |
| 16 | Year11Q3 | 10.625 | £5,842 | £4,053 | 0.5 | 3.0 | £4,439 | £3,080 | £ | 1,752.56 | £ | 1,215.99 | £ | 4,089.30 | £ | 2,837.31 |
| 17 | Year11Q4 | 10.875 | £5,842 | £4,019 | 0.5 | 3.0 | £0     | £0     | £ | 1,752.56 | £ | 1,205.58 | £ | 4,089.30 | £ | 2,813.02 |
| 18 | Year12Q1 | 11.125 | £5,842 | £3,984 | 0.5 | 3.0 | £0     | £0     | £ | 1,752.56 | £ | 1,195.25 | £ | 4,089.30 | £ | 2,788.93 |
| 19 | Year12Q2 | 11.375 | £5,842 | £3,950 | 0.5 | 3.0 | £0     | £0     | £ | 1,752.56 | £ | 1,185.02 | £ | 4,089.30 | £ | 2,765.04 |
| 20 | Year12Q3 | 11.625 | £5,842 | £3,916 | 0.4 | 3.0 | £4,439 | £2,976 | £ | 1,752.56 | £ | 1,174.87 | £ | 4,089.30 | £ | 2,741.37 |
| 21 | Year12Q4 | 11.875 | £5,842 | £3,883 | 0.4 | 3.0 | £0     | £0     | £ | 1,752.56 | £ | 1,164.81 | £ | 4,089.30 | £ | 2,717.89 |
| 22 | Year13Q1 | 12.125 | £5,842 | £3,849 | 0.4 | 3.0 | £0     | £0     | £ | 1,752.56 | £ | 1,154.83 | £ | 4,089.30 | £ | 2,694.61 |
| 23 | Year13Q2 | 12.375 | £5,842 | £3,816 | 0.4 | 3.0 | £0     | £0     | £ | 1,752.56 | £ | 1,144.95 | £ | 4,089.30 | £ | 2,671.54 |
| 24 | Year13Q3 | 12.625 | £5,842 | £3,784 | 0.4 | 3.0 | £4,439 | £2,875 | £ | 1,752.56 | £ | 1,135.14 | £ | 4,089.30 | £ | 2,648.66 |
| 25 | Year13Q4 | 12.875 | £5,842 | £3,751 | 0.4 | 3.0 | £0     | £0     | £ | 1,752.56 | £ | 1,125.42 | £ | 4,089.30 | £ | 2,625.98 |
| 26 | Year14Q1 | 13.125 | £5,842 | £3,719 | 0.4 | 3.0 | £0     | £0     | £ | 1,752.56 | £ | 1,115.78 | £ | 4,089.30 | £ | 2,603.49 |
| 27 | Year14Q2 | 13.375 | £5,842 | £3,687 | 0.4 | 3.0 | £0     | £0     | £ | 1,752.56 | £ | 1,106.23 | £ | 4,089.30 | £ | 2,581.20 |
| 28 | Year14Q3 | 13.625 | £5,842 | £3,656 | 0.3 | 3.0 | £4,439 | £2,778 | £ | 1,752.56 | £ | 1,096.75 | £ | 4,089.30 | £ | 2,559.09 |
| 29 | Year14Q4 | 13.875 | £5,842 | £3,625 | 0.3 | 3.0 | £0     | £0     | £ | 1,752.56 | £ | 1,087.36 | £ | 4,089.30 | £ | 2,537.18 |
| 30 | Year15Q1 | 14.125 | £5,842 | £3,594 | 0.3 | 3.0 | £0     | £0     | £ | 1,752.56 | £ | 1,078.05 | £ | 4,089.30 | £ | 2,515.45 |
| 31 | Year15Q2 | 14.375 | £5,842 | £3,563 | 0.3 | 3.0 | £0     | £0     | £ | 1,752.56 | £ | 1,068.82 | £ | 4,089.30 | £ | 2,493.91 |
| 32 | Year15Q3 | 14.625 | £5,842 | £3,532 | 0.2 | 3.0 | £4,439 | £2,684 | £ | 1,752.56 | £ | 1,059.67 | £ | 4,089.30 | £ | 2,472.55 |
| 33 | Year15Q4 | 14.875 | £5,842 | £3,502 | 0.2 | 3.0 | £0     | £0     | £ | 1,752.56 | £ | 1,050.59 | £ | 4,089.30 | £ | 2,451.38 |
| 34 | Year16Q1 | 15.125 | £5,842 | £3,472 | 0.2 | 3.0 | £0     | £0     | £ | 1,752.56 | £ | 1,041.59 | £ | 4,089.30 | £ | 2,430.39 |
| 35 | Year16Q2 | 15.375 | £5,842 | £3,442 | 0.2 | 3.0 | £0     | £0     | £ | 1,752.56 | £ | 1,032.68 | £ | 4,089.30 | £ | 2,409.58 |
| 36 | Year16Q3 | 15.625 | £5,842 | £3,413 | 0.2 | 3.0 | £4,439 | £2,593 | £ | 1,752.56 | £ | 1,023.83 | £ | 4,089.30 | £ | 2,388.94 |
| 37 | Year16Q4 | 15.875 | £5,842 | £3,384 | 0.2 | 3.0 | £0     | £0     | £ | 1,752.56 | £ | 1,015.06 | £ | 4,089.30 | £ | 2,368.48 |
| 38 | Year17Q1 | 16.125 | £5,842 | £3,355 | 0.2 | 3.0 | £0     | £0     | £ | 1,752.56 | £ | 1,006.37 | £ | 4,089.30 | £ | 2,348.20 |
| 39 | Year17Q2 | 16.375 | £5,842 | £3,326 | 0.2 | 3.0 | £0     | £0     | £ | 1,752.56 | £ | 997.75   | £ | 4,089.30 | £ | 2,328.09 |
| 40 | Year17Q3 | 16.625 | £5,842 | £3,297 | 0.1 | 3.0 | £4,439 | £2,506 | £ | 1,752.56 | £ | 989.21   | £ | 4,089.30 | £ | 2,308.16 |
| 41 | Year17Q4 | 16.875 | £5,842 | £3,269 | 0.1 | 3.0 | £0     | £0     | £ | 1,752.56 | £ | 980.74   | £ | 4,089.30 | £ | 2,288.39 |
| 42 | Year18Q1 | 17.125 | £5,842 | £3,241 | 0.1 | 3.0 | £0     | £0     | £ | 1,752.56 | £ | 972.34   | £ | 4,089.30 | £ | 2,268.79 |
| 43 | Year18Q2 | 17.375 | £5,842 | £3,213 | 0.1 | 3.0 | £0     | £0     | £ | 1,752.56 | £ | 964.01   | £ | 4,089.30 | £ | 2,249.36 |
| 44 | Year18Q3 | 17.625 | £5,842 | £3,186 | 0.1 | 3.0 | £4,439 | £2,421 | £ | 1,752.56 | £ | 955.76   | £ | 4,089.30 | £ | 2,230.10 |
| 45 | Year18Q4 | 17.875 | £5,842 | £3,159 | 0.1 | 3.0 | £0     | £0     | £ | 1,752.56 | £ | 947.57   | £ | 4,089.30 | £ | 2,211.00 |



|    |          |   |        |   |        |   |         |   |         |    |        |      |        |        |
|----|----------|---|--------|---|--------|---|---------|---|---------|----|--------|------|--------|--------|
| 1  |          |   |        |   |        |   |         |   |         |    |        |      |        |        |
| 2  | Year3Q1  | £ | 22,195 | £ | 21,672 | £ | 22,592  | £ | 21,578  | £  | 93     | 1.00 | 3.125  | 999    |
| 3  | Year3Q2  | £ | 22,195 | £ | 21,672 | £ | 26,041  | £ | 24,757  | -£ | 3,085  | 0.88 | 3.375  | 3.375  |
| 4  | Year3Q3  | £ | 26,634 | £ | 25,727 | £ | 29,968  | £ | 28,345  | -£ | 2,618  | 0.91 | 3.625  | 3.625  |
| 5  | Year3Q4  | £ | 26,634 | £ | 25,727 | £ | 33,896  | £ | 31,903  | -£ | 6,176  | 0.81 | 3.875  | 3.875  |
| 6  | Year4Q1  | £ | 26,634 | £ | 25,727 | £ | 37,823  | £ | 35,430  | -£ | 9,703  | 0.73 | 4.125  | 4.125  |
| 7  | Year4Q2  | £ | 26,634 | £ | 25,727 | £ | 41,751  | £ | 38,927  | -£ | 13,200 | 0.66 | 4.375  | 4.375  |
| 8  | Year4Q3  | £ | 31,073 | £ | 29,646 | £ | 45,840  | £ | 42,537  | -£ | 12,892 | 0.70 | 4.625  | 4.625  |
| 9  | Year4Q4  | £ | 31,073 | £ | 29,646 | £ | 49,930  | £ | 46,116  | -£ | 16,470 | 0.64 | 4.875  | 4.875  |
| 10 | Year5Q1  | £ | 31,073 | £ | 29,646 | £ | 54,019  | £ | 49,665  | -£ | 20,019 | 0.60 | 5.125  | 5.125  |
| 11 | Year5Q2  | £ | 31,073 | £ | 29,646 | £ | 58,108  | £ | 53,182  | -£ | 23,537 | 0.56 | 5.375  | 5.375  |
| 12 | Year5Q3  | £ | 35,512 | £ | 33,432 | £ | 62,197  | £ | 56,670  | -£ | 23,238 | 0.59 | 5.625  | 5.625  |
| 13 | Year5Q4  | £ | 35,512 | £ | 33,432 | £ | 66,287  | £ | 60,128  | -£ | 26,696 | 0.56 | 5.875  | 5.875  |
| 14 | Year6Q1  | £ | 35,512 | £ | 33,432 | £ | 70,376  | £ | 63,556  | -£ | 30,125 | 0.53 | 6.125  | 6.125  |
| 15 | Year6Q2  | £ | 35,512 | £ | 33,432 | £ | 74,465  | £ | 66,955  | -£ | 33,524 | 0.50 | 6.375  | 6.375  |
| 16 | Year6Q3  | £ | 39,951 | £ | 37,090 | £ | 78,555  | £ | 70,325  | -£ | 33,235 | 0.53 | 6.625  | 6.625  |
| 17 | Year6Q4  | £ | 39,951 | £ | 37,090 | £ | 82,644  | £ | 73,666  | -£ | 36,576 | 0.50 | 6.875  | 6.875  |
| 18 | Year7Q1  | £ | 39,951 | £ | 37,090 | £ | 86,733  | £ | 76,979  | -£ | 39,889 | 0.48 | 7.125  | 7.125  |
| 19 | Year7Q2  | £ | 39,951 | £ | 37,090 | £ | 90,823  | £ | 80,263  | -£ | 43,173 | 0.46 | 7.375  | 7.375  |
| 20 | Year7Q3  | £ | 44,390 | £ | 40,624 | £ | 94,912  | £ | 83,518  | -£ | 42,894 | 0.49 | 7.625  | 7.625  |
| 21 | Year7Q4  | £ | 44,390 | £ | 40,624 | £ | 99,001  | £ | 86,746  | -£ | 46,122 | 0.47 | 7.875  | 7.875  |
| 22 | Year8Q1  | £ | 44,390 | £ | 40,624 | £ | 103,090 | £ | 89,947  | -£ | 49,323 | 0.45 | 8.125  | 8.125  |
| 23 | Year8Q2  | £ | 44,390 | £ | 40,624 | £ | 107,180 | £ | 93,120  | -£ | 52,496 | 0.44 | 8.375  | 8.375  |
| 24 | Year8Q3  | £ | 48,829 | £ | 44,039 | £ | 111,269 | £ | 96,266  | -£ | 52,227 | 0.46 | 8.625  | 8.625  |
| 25 | Year8Q4  | £ | 48,829 | £ | 44,039 | £ | 115,358 | £ | 99,384  | -£ | 55,346 | 0.44 | 8.875  | 8.875  |
| 26 | Year9Q1  | £ | 48,829 | £ | 44,039 | £ | 119,448 | £ | 102,476 | -£ | 58,438 | 0.43 | 9.125  | 9.125  |
| 27 | Year9Q2  | £ | 48,829 | £ | 44,039 | £ | 123,537 | £ | 105,542 | -£ | 61,503 | 0.42 | 9.375  | 9.375  |
| 28 | Year9Q3  | £ | 53,268 | £ | 47,338 | £ | 127,626 | £ | 108,582 | -£ | 61,243 | 0.44 | 9.625  | 9.625  |
| 29 | Year9Q4  | £ | 53,268 | £ | 47,338 | £ | 131,715 | £ | 111,595 | -£ | 64,257 | 0.42 | 9.875  | 9.875  |
| 30 | Year10Q1 | £ | 53,268 | £ | 47,338 | £ | 135,805 | £ | 114,582 | -£ | 67,244 | 0.41 | 10.125 | 10.125 |
| 31 | Year10Q2 | £ | 53,268 | £ | 47,338 | £ | 139,894 | £ | 117,544 | -£ | 70,206 | 0.40 | 10.375 | 10.375 |
| 32 | Year10Q3 | £ | 57,707 | £ | 50,526 | £ | 143,983 | £ | 120,481 | -£ | 69,955 | 0.42 | 10.625 | 10.625 |
| 33 | Year10Q4 | £ | 57,707 | £ | 50,526 | £ | 148,073 | £ | 123,393 | -£ | 72,867 | 0.41 | 10.875 | 10.875 |
| 34 | Year11Q1 | £ | 57,707 | £ | 50,526 | £ | 152,162 | £ | 126,279 | -£ | 75,753 | 0.40 | 11.125 | 11.125 |
| 35 | Year11Q2 | £ | 57,707 | £ | 50,526 | £ | 156,251 | £ | 129,141 | -£ | 78,615 | 0.39 | 11.375 | 11.375 |
| 36 | Year11Q3 | £ | 62,146 | £ | 53,606 | £ | 160,341 | £ | 131,978 | -£ | 78,372 | 0.41 | 11.625 | 11.625 |
| 37 | Year11Q4 | £ | 62,146 | £ | 53,606 | £ | 164,430 | £ | 134,791 | -£ | 81,185 | 0.40 | 11.875 | 11.875 |
| 38 | Year12Q1 | £ | 62,146 | £ | 53,606 | £ | 168,519 | £ | 137,580 | -£ | 83,974 | 0.39 | 12.125 | 12.125 |
| 39 | Year12Q2 | £ | 62,146 | £ | 53,606 | £ | 172,608 | £ | 140,345 | -£ | 86,739 | 0.38 | 12.375 | 12.375 |
| 40 | Year12Q3 | £ | 66,585 | £ | 56,582 | £ | 176,698 | £ | 143,087 | -£ | 86,505 | 0.40 | 12.625 | 12.625 |
| 41 | Year12Q4 | £ | 66,585 | £ | 56,582 | £ | 180,787 | £ | 145,804 | -£ | 89,223 | 0.39 | 12.875 | 12.875 |
| 42 | Year13Q1 | £ | 66,585 | £ | 56,582 | £ | 184,876 | £ | 148,499 | -£ | 91,918 | 0.38 | 13.125 | 13.125 |
| 43 | Year13Q2 | £ | 66,585 | £ | 56,582 | £ | 188,966 | £ | 151,171 | -£ | 94,589 | 0.37 | 13.375 | 13.375 |
| 44 | Year13Q3 | £ | 71,024 | £ | 59,457 | £ | 193,055 | £ | 153,819 | -£ | 94,363 | 0.39 | 13.625 | 13.625 |
| 45 | Year13Q4 | £ | 71,024 | £ | 59,457 | £ | 197,144 | £ | 156,445 | -£ | 96,989 | 0.38 | 13.875 | 13.875 |
| 46 |          |   |        |   |        |   |         |   |         |    |        |      |        |        |

|    |          |   |         |   |        |   |         |   |         |    |         |      |        |        |
|----|----------|---|---------|---|--------|---|---------|---|---------|----|---------|------|--------|--------|
| 1  |          |   |         |   |        |   |         |   |         |    |         |      |        |        |
| 2  | Year14Q1 | £ | 71,024  | £ | 59,457 | £ | 201,234 | £ | 159,049 | -£ | 99,592  | 0.37 | 14.125 | 14.125 |
| 3  | Year14Q2 | £ | 71,024  | £ | 59,457 | £ | 205,323 | £ | 161,630 | -£ | 102,173 | 0.37 | 14.375 | 14.375 |
| 4  | Year14Q3 | £ | 75,462  | £ | 62,235 | £ | 209,412 | £ | 164,189 | -£ | 101,954 | 0.38 | 14.625 | 14.625 |
| 5  | Year14Q4 | £ | 75,462  | £ | 62,235 | £ | 213,501 | £ | 166,726 | -£ | 104,492 | 0.37 | 14.875 | 14.875 |
| 6  | Year15Q1 | £ | 75,462  | £ | 62,235 | £ | 217,591 | £ | 169,242 | -£ | 107,007 | 0.37 | 15.125 | 15.125 |
| 7  | Year15Q2 | £ | 75,462  | £ | 62,235 | £ | 221,680 | £ | 171,736 | -£ | 109,501 | 0.36 | 15.375 | 15.375 |
| 8  | Year15Q3 | £ | 79,901  | £ | 64,919 | £ | 225,769 | £ | 174,208 | -£ | 109,290 | 0.37 | 15.625 | 15.625 |
| 9  | Year15Q4 | £ | 79,901  | £ | 64,919 | £ | 229,859 | £ | 176,660 | -£ | 111,741 | 0.37 | 15.875 | 15.875 |
| 10 | Year16Q1 | £ | 79,901  | £ | 64,919 | £ | 233,948 | £ | 179,090 | -£ | 114,171 | 0.36 | 16.125 | 16.125 |
| 11 | Year16Q2 | £ | 79,901  | £ | 64,919 | £ | 238,037 | £ | 181,499 | -£ | 116,581 | 0.36 | 16.375 | 16.375 |
| 12 | Year16Q3 | £ | 84,340  | £ | 67,512 | £ | 242,126 | £ | 183,888 | -£ | 116,377 | 0.37 | 16.625 | 16.625 |
| 13 | Year16Q4 | £ | 84,340  | £ | 67,512 | £ | 246,216 | £ | 186,257 | -£ | 118,745 | 0.36 | 16.875 | 16.875 |
| 14 | Year17Q1 | £ | 84,340  | £ | 67,512 | £ | 250,305 | £ | 188,605 | -£ | 121,093 | 0.36 | 17.125 | 17.125 |
| 15 | Year17Q2 | £ | 84,340  | £ | 67,512 | £ | 254,394 | £ | 190,933 | -£ | 123,421 | 0.35 | 17.375 | 17.375 |
| 16 | Year17Q3 | £ | 88,779  | £ | 70,017 | £ | 258,484 | £ | 193,241 | -£ | 123,224 | 0.36 | 17.625 | 17.625 |
| 17 | Year17Q4 | £ | 88,779  | £ | 70,017 | £ | 262,573 | £ | 195,530 | -£ | 125,512 | 0.36 | 17.875 | 17.875 |
| 18 | Year18Q1 | £ | 88,779  | £ | 70,017 | £ | 266,662 | £ | 197,799 | -£ | 127,781 | 0.35 | 18.125 | 18.125 |
| 19 | Year18Q2 | £ | 88,779  | £ | 70,017 | £ | 270,752 | £ | 200,048 | -£ | 130,031 | 0.35 | 18.375 | 18.375 |
| 20 | Year18Q3 | £ | 93,218  | £ | 72,438 | £ | 274,841 | £ | 202,278 | -£ | 129,840 | 0.36 | 18.625 | 18.625 |
| 21 | Year18Q4 | £ | 93,218  | £ | 72,438 | £ | 278,930 | £ | 204,489 | -£ | 132,051 | 0.35 | 18.875 | 18.875 |
| 22 | Year19Q1 | £ | 93,218  | £ | 72,438 | £ | 283,019 | £ | 206,681 | -£ | 134,243 | 0.35 | 19.125 | 19.125 |
| 23 | Year19Q2 | £ | 93,218  | £ | 72,438 | £ | 287,109 | £ | 208,854 | -£ | 136,416 | 0.35 | 19.375 | 19.375 |
| 24 | Year19Q3 | £ | 97,657  | £ | 74,777 | £ | 291,198 | £ | 211,009 | -£ | 136,232 | 0.35 | 19.625 | 19.625 |
| 25 | Year19Q4 | £ | 97,657  | £ | 74,777 | £ | 295,287 | £ | 213,145 | -£ | 138,368 | 0.35 | 19.875 | 19.875 |
| 26 | Year20Q1 | £ | 97,657  | £ | 74,777 | £ | 299,377 | £ | 215,263 | -£ | 140,486 | 0.35 | 20.125 | 20.125 |
| 27 | Year20Q2 | £ | 97,657  | £ | 74,777 | £ | 303,466 | £ | 217,363 | -£ | 142,586 | 0.34 | 20.375 | 20.375 |
| 28 | Year20Q3 | £ | 102,096 | £ | 77,037 | £ | 307,555 | £ | 219,445 | -£ | 142,408 | 0.35 | 20.625 | 20.625 |
| 29 | Year20Q4 | £ | 102,096 | £ | 77,037 | £ | 311,644 | £ | 221,509 | -£ | 144,472 | 0.35 | 20.875 | 20.875 |
| 30 | Year21Q1 | £ | 102,096 | £ | 77,037 | £ | 315,734 | £ | 223,555 | -£ | 146,518 | 0.34 | 21.125 | 21.125 |
| 31 | Year21Q2 | £ | 102,096 | £ | 77,037 | £ | 319,823 | £ | 225,584 | -£ | 148,547 | 0.34 | 21.375 | 21.375 |
| 32 | Year21Q3 | £ | 106,535 | £ | 79,220 | £ | 323,912 | £ | 227,595 | -£ | 148,375 | 0.35 | 21.625 | 21.625 |
| 33 | Year21Q4 | £ | 106,535 | £ | 79,220 | £ | 328,002 | £ | 229,590 | -£ | 150,369 | 0.35 | 21.875 | 21.875 |
| 34 | Year22Q1 | £ | 106,535 | £ | 79,220 | £ | 332,091 | £ | 231,567 | -£ | 152,346 | 0.34 | 22.125 | 22.125 |
| 35 | Year22Q2 | £ | 106,535 | £ | 79,220 | £ | 336,180 | £ | 233,527 | -£ | 154,307 | 0.34 | 22.375 | 22.375 |
| 36 | Year22Q3 | £ | 110,974 | £ | 81,330 | £ | 340,270 | £ | 235,470 | -£ | 154,140 | 0.35 | 22.625 | 22.625 |
| 37 | Year22Q4 | £ | 110,974 | £ | 81,330 | £ | 344,359 | £ | 237,397 | -£ | 156,067 | 0.34 | 22.875 | 22.875 |
| 38 | Year23Q1 | £ | 110,974 | £ | 81,330 | £ | 348,448 | £ | 239,307 | -£ | 157,977 | 0.34 | 23.125 | 23.125 |
| 39 | Year23Q2 | £ | 110,974 | £ | 81,330 | £ | 352,537 | £ | 241,201 | -£ | 159,871 | 0.34 | 23.375 | 23.375 |
| 40 | Year23Q3 | £ | 115,413 | £ | 83,368 | £ | 356,627 | £ | 243,079 | -£ | 159,711 | 0.34 | 23.625 | 23.625 |
| 41 | Year23Q4 | £ | 115,413 | £ | 83,368 | £ | 360,716 | £ | 244,941 | -£ | 161,572 | 0.34 | 23.875 | 23.875 |
| 42 | Year24Q1 | £ | 115,413 | £ | 83,368 | £ | 364,805 | £ | 246,786 | -£ | 163,418 | 0.34 | 24.125 | 24.125 |
| 43 | Year24Q2 | £ | 115,413 | £ | 83,368 | £ | 368,895 | £ | 248,616 | -£ | 165,248 | 0.34 | 24.375 | 24.375 |
| 44 | Year24Q3 | £ | 119,852 | £ | 85,338 | £ | 372,984 | £ | 250,430 | -£ | 165,093 | 0.34 | 24.625 | 24.625 |
| 45 | Year24Q4 | £ | 119,852 | £ | 85,338 | £ | 377,073 | £ | 252,229 | -£ | 166,891 | 0.34 | 24.875 | 24.875 |
| 46 |          |   |         |   |        |   |         |   |         |    |         |      |        |        |

1  
2  
3  
4  
5  
6  
7  
8  
9  
10  
11  
12  
13  
14  
15  
16  
17  
18  
19  
20  
21  
22  
23  
24  
25  
26  
27  
28  
29  
30  
31  
32  
33  
34  
35  
36  
37  
38  
39  
40  
41  
42  
43  
44  
45  
46

|          |   |         |   |        |   |         |   |         |    |         |      |        |        |
|----------|---|---------|---|--------|---|---------|---|---------|----|---------|------|--------|--------|
| Year25Q1 | £ | 119,852 | £ | 85,338 | £ | 381,162 | £ | 254,012 | -£ | 168,675 | 0.34 | 25.125 | 25.125 |
| Year25Q2 | £ | 119,852 | £ | 85,338 | £ | 385,252 | £ | 255,780 | -£ | 170,443 | 0.33 | 25.375 | 25.375 |
| Year25Q3 | £ | 124,291 | £ | 87,240 | £ | 389,341 | £ | 257,533 | -£ | 170,293 | 0.34 | 25.625 | 25.625 |
| Year25Q4 | £ | 124,291 | £ | 87,240 | £ | 393,430 | £ | 259,271 | -£ | 172,031 | 0.34 | 25.875 | 25.875 |

For peer review only

# CHEERS Checklist

| Section/topic                                          | #   | Recommendation                                                                                                                                                                             | Reported on page # |
|--------------------------------------------------------|-----|--------------------------------------------------------------------------------------------------------------------------------------------------------------------------------------------|--------------------|
| <b>TITLE AND ABSTRACT</b>                              |     |                                                                                                                                                                                            |                    |
| Title                                                  | 1   | Identify the study as an economic evaluation or use more specific terms such as “cost-effectiveness analysis”, and describe the interventions compared.                                    | 1                  |
| Abstract                                               | 2   | Provide a structured summary of objectives, perspective, setting, methods (including study design and inputs), results (including base case and uncertainty analyses), and conclusions.    | 3 - 4              |
| <b>INTRODUCTION</b>                                    |     |                                                                                                                                                                                            |                    |
| Background and objectives                              | 3   | Provide an explicit statement of the broader context for the study.<br>Present the study question and its relevance for health policy or practice decisions.                               | 5 - 6              |
| <b>METHODS</b>                                         |     |                                                                                                                                                                                            |                    |
| Target population and subgroups                        | 4   | Describe characteristics of the base case population and subgroups analysed, including why they were chosen.                                                                               | 6 - 7              |
| Setting and location                                   | 5   | State relevant aspects of the system(s) in which the decision(s) need(s) to be made.                                                                                                       | 6 - 7              |
| Study perspective                                      | 6   | Describe the perspective of the study and relate this to the costs being evaluated.                                                                                                        | 10                 |
| Comparators                                            | 7   | Describe the interventions or strategies being compared and state why they were chosen.                                                                                                    | 10 - 11            |
| Time horizon                                           | 8   | State the time horizon(s) over which costs and consequences are being evaluated and say why appropriate.                                                                                   | 10                 |
| Discount rate                                          | 9   | Report the choice of discount rate(s) used for costs and outcomes and say why appropriate.                                                                                                 | 10                 |
| Choice of health outcomes                              | 10  | Describe what outcomes were used as the measure(s) of benefit in the evaluation and their relevance for the type of analysis performed.                                                    | 10-11              |
| Measurement of effectiveness                           | 11a | <i>Single study-based estimates</i> : Describe fully the design features of the single effectiveness study and why the single study was a sufficient source of clinical effectiveness data |                    |
|                                                        | 11b | <i>Synthesis-based estimates</i> : Describe fully the methods used for identification of included studies and synthesis of clinical effectiveness data.                                    | 7 - 10             |
| Measurement and valuation of preference based outcomes | 12  | If applicable, describe the population and methods used to elicit preferences for outcomes                                                                                                 | NA                 |

# CHEERS Checklist

| Section/topic                        | #   | Checklist item                                                                                                                                                                                                                                                                                                                                        | Reported on page #        |
|--------------------------------------|-----|-------------------------------------------------------------------------------------------------------------------------------------------------------------------------------------------------------------------------------------------------------------------------------------------------------------------------------------------------------|---------------------------|
| Estimating resources and costs       | 13a | <i>Single study-based economic evaluation:</i> Describe approaches used to estimate resource use associated with the alternative interventions. Describe primary or secondary research methods for valuing each resource item in terms of its unit cost. Describe any adjustments made to approximate to opportunity costs.                           | NA                        |
|                                      | 13b | <i>Model-based economic evaluation:</i> Describe approaches and data sources used to estimate resource use associated with model health states. Describe primary or secondary research methods for valuing each resource item in terms of its unit cost. Describe any adjustments made to approximate to opportunity costs.                           | 7 - 10                    |
| Currency, price date, and conversion | 14  | Report the dates of the estimated resource quantities and unit costs. Describe methods for adjusting estimated unit costs to the year of reported costs if necessary. Describe methods for converting costs into a common currency base and the exchange rate.                                                                                        | 8 - 9                     |
| Choice of model                      | 15  | Describe and give reasons for the specific type of decision-analytical model used. Providing a figure to show model structure is strongly recommended.                                                                                                                                                                                                | 9 - 10                    |
| Assumptions                          | 16  | Describe all structural or other assumptions underpinning the decision-analytical model.                                                                                                                                                                                                                                                              | 10 - 12                   |
| Analytical models                    | 17  | Describe all analytical methods supporting the evaluation. This could include methods for dealing with skewed, missing, or censored data; extrapolation methods; methods for pooling data; approaches to validate or make adjustments (such as half cycle corrections) to a model; and methods for handling population heterogeneity and uncertainty. | 7 - 11                    |
| <b>RESULTS</b>                       |     |                                                                                                                                                                                                                                                                                                                                                       |                           |
| Study parameters                     | 18  | Report the values, ranges, references, and, if used, probability distributions for all parameters/ Report reasons or sources for distributions used to represent uncertainty where appropriate. Providing a table to show the input values is strongly recommended.                                                                                   | 12 – 14<br>Tables 1, 2, 3 |
| Incremental costs and outcomes       | 19  | For each intervention, report mean values for the main categories of estimated costs and outcomes of interest, as well as mean differences between the comparator groups. If applicable, report incremental cost-effectiveness ratios.                                                                                                                | 17 - 18                   |
| Characterising uncertainty           | 20a | <i>Single study-based economic evaluation:</i> Describe the effects of sampling uncertainty for the estimated incremental cost and incremental effectiveness parameters, together with the impact of methodological assumptions (such as discount rate, study perspective).                                                                           | NA                        |
|                                      | 20b | <i>Model-based economic evaluation:</i> Describe the effects on the results of uncertainty for all input parameters, and uncertainty related to the structure of the model and assumptions.                                                                                                                                                           | 13                        |
| Characterising heterogeneity         | 21  | If applicable, report differences in costs, outcomes, or cost-effectiveness that can be explained by variations between subgroups of patients with different baseline characteristics or other observed variability in effects that are not reducible by more information.                                                                            | NA                        |
| Section/topic                        | #   | Checklist item                                                                                                                                                                                                                                                                                                                                        | Reported on page #        |
| <b>DISCUSSION</b>                    |     |                                                                                                                                                                                                                                                                                                                                                       |                           |



# CHEERS Checklist

1  
2  
3  
4  
5  
6  
7  
8  
9  
10  
11  
12  
13  
14  
15  
16  
17  
18  
19  
20  
21  
22  
23  
24  
25  
26  
27  
28  
29  
30  
31  
32  
33  
34  
35  
36  
37  
38  
39  
40  
41  
42  
43  
44  
45  
46  
47

|                                                                      |    |                                                                                                                                                                                                                                                   |         |
|----------------------------------------------------------------------|----|---------------------------------------------------------------------------------------------------------------------------------------------------------------------------------------------------------------------------------------------------|---------|
| Study findings, limitations, generalisability, and current knowledge | 22 | Summarise key study findings and describe how they support the conclusions reached. Discuss limitations and the generalisability of the findings and how the findings fit with current knowledge.                                                 | 19 – 26 |
| <b>Other</b>                                                         |    |                                                                                                                                                                                                                                                   |         |
| Source of funding                                                    | 23 | Describe how the study was funded and the role of the funder in the identification, design, conduct, and reporting of the analysis. Describe other non-monetary sources of support.                                                               | 27      |
| Conflicts of interest                                                | 24 | Describe any potential for conflict of interest of study contributors in accordance with journal policy. In the absence of a journal policy, we recommend authors comply with International Committee of Medical Journal Editors recommendations. | 27      |
