# Supplementary material for: Cost–benefit analysis of surveillance for surgical site infection following caesarean section
Source: PubMed Central journal article supplement — BMJ Open. 2020 Jul 20;10(7):e036919. doi: 10.1136/bmjopen-2020-036919 (PMC7375637; doi:10.1136/bmjopen-2020-036919), 2020-07-20
Supplement: bmjopen-2020-036919supp001.pdf [file bmjopen-2020-036919supp001.pdf]

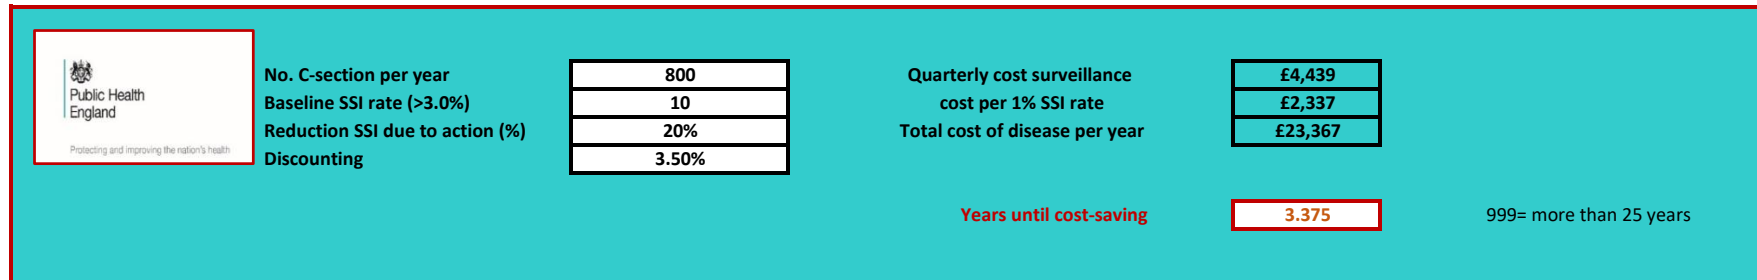

| Period   | Discounting | Total cost of disease per quarter | Total costs discounted | SSI rate reduction (%) | SSI rate reduction to 3% minimum (%) | Quarterly cost of surveillance | Quarterly costs of surveillance discounted | New total costs after reduction SSI | New total cost discounted | Prevented costs | Prevented costs discounted |
|----------|-------------|-----------------------------------|------------------------|------------------------|--------------------------------------|--------------------------------|--------------------------------------------|-------------------------------------|---------------------------|-----------------|----------------------------|
| Baseline | 0           | £5,842                            | £5,842                 | 10.00                  | 10.0                                 | £4,439                         | £4,439                                     | £ 5,841.85                          | £ 5,841.85                | £ -             | £ -                        |
| Year1Q1  | 0.125       | £5,842                            | £5,817                 | 8.00                   | 8.0                                  | £4,439                         | £4,420                                     | £ 4,673.48                          | £ 4,653.43                | £ 1,168.37      | £ 1,163.36                 |
| Year1Q2  | 0.375       | £5,842                            | £5,767                 | 8.00                   | 8.0                                  | £0                             | £0                                         | £ 4,673.48                          | £ 4,613.58                | £ 1,168.37      | £ 1,153.39                 |
| Year1Q3  | 0.625       | £5,842                            | £5,718                 | 6.40                   | 6.4                                  | £4,439                         | £4,345                                     | £ 3,738.78                          | £ 3,659.25                | £ 2,103.07      | £ 2,058.33                 |
| Year1Q4  | 0.875       | £5,842                            | £5,669                 | 6.40                   | 6.4                                  | £0                             | £0                                         | £ 3,738.78                          | £ 3,627.92                | £ 2,103.07      | £ 2,040.70                 |
| Year2Q1  | 1.125       | £5,842                            | £5,620                 | 5.12                   | 5.1                                  | £4,439                         | £4,270                                     | £ 2,991.03                          | £ 2,877.48                | £ 2,850.82      | £ 2,742.60                 |
| Year2Q2  | 1.375       | £5,842                            | £5,572                 | 5.12                   | 5.1                                  | £0                             | £0                                         | £ 2,991.03                          | £ 2,852.84                | £ 2,850.82      | £ 2,719.11                 |
| Year2Q3  | 1.625       | £5,842                            | £5,524                 | 4.10                   | 4.1                                  | £4,439                         | £4,198                                     | £ 2,392.82                          | £ 2,262.73                | £ 3,449.03      | £ 3,261.51                 |
| Year2Q4  | 1.875       | £5,842                            | £5,477                 | 4.10                   | 4.1                                  | £0                             | £0                                         | £ 2,392.82                          | £ 2,243.35                | £ 3,449.03      | £ 3,233.58                 |
| Year3Q1  | 2.125       | £5,842                            | £5,430                 | 4.10                   | 4.1                                  | £0                             | £0                                         | £ 2,392.82                          | £ 2,224.14                | £ 3,449.03      | £ 3,205.89                 |
| Year3Q2  | 2.375       | £5,842                            | £5,384                 | 4.10                   | 4.1                                  | £0                             | £0                                         | £ 2,392.82                          | £ 2,205.09                | £ 3,449.03      | £ 3,178.44                 |
| Year3Q3  | 2.625       | £5,842                            | £5,337                 | 3.28                   | 3.3                                  | £4,439                         | £4,056                                     | £ 1,914.26                          | £ 1,748.97                | £ 3,927.59      | £ 3,588.46                 |
| Year3Q4  | 2.875       | £5,842                            | £5,292                 | 3.28                   | 3.3                                  | £0                             | £0                                         | £ 1,914.26                          | £ 1,733.99                | £ 3,927.59      | £ 3,557.73                 |
| Year4Q1  | 3.125       | £5,842                            | £5,246                 | 3.3                    | 3.3                                  | £0                             | £0                                         | £ 1,914.26                          | £ 1,719.14                | £ 3,927.59      | £ 3,527.26                 |
| Year4Q2  | 3.375       | £5,842                            | £5,201                 | 3.3                    | 3.3                                  | £0                             | £0                                         | £ 1,914.26                          | £ 1,704.42                | £ 3,927.59      | £ 3,497.06                 |
| Year4Q3  | 3.625       | £5,842                            | £5,157                 | 2.6                    | 3.0                                  | £4,439                         | £3,919                                     | £ 1,752.56                          | £ 1,547.08                | £ 4,089.30      | £ 3,609.85                 |
| Year4Q4  | 3.875       | £5,842                            | £5,113                 | 2.6                    | 3.0                                  | £0                             | £0                                         | £ 1,752.56                          | £ 1,533.83                | £ 4,089.30      | £ 3,578.94                 |
| Year5Q1  | 4.125       | £5,842                            | £5,069                 | 2.6                    | 3.0                                  | £0                             | £0                                         | £ 1,752.56                          | £ 1,520.70                | £ 4,089.30      | £ 3,548.29                 |
| Year5Q2  | 4.375       | £5,842                            | £5,026                 | 2.6                    | 3.0                                  | £0                             | £0                                         | £ 1,752.56                          | £ 1,507.67                | £ 4,089.30      | £ 3,517.91                 |
| Year5Q3  | 4.625       | £5,842                            | £4,983                 | 2.1                    | 3.0                                  | £4,439                         | £3,786                                     | £ 1,752.56                          | £ 1,494.76                | £ 4,089.30      | £ 3,487.78                 |
| Year5Q4  | 4.875       | £5,842                            | £4,940                 | 2.1                    | 3.0                                  | £0                             | £0                                         | £ 1,752.56                          | £ 1,481.96                | £ 4,089.30      | £ 3,457.91                 |
| Year6Q1  | 5.125       | £5,842                            | £4,898                 | 2.1                    | 3.0                                  | £0                             | £0                                         | £ 1,752.56                          | £ 1,469.27                | £ 4,089.30      | £ 3,428.30                 |
| Year6Q2  | 5.375       | £5,842                            | £4,856                 | 2.1                    | 3.0                                  | £0                             | £0                                         | £ 1,752.56                          | £ 1,456.69                | £ 4,089.30      | £ 3,398.94                 |
| Year6Q3  | 5.625       | £5,842                            | £4,814                 | 1.7                    | 3.0                                  | £4,439                         | £3,658                                     | £ 1,752.56                          | £ 1,444.22                | £ 4,089.30      | £ 3,369.84                 |
| Year6Q4  | 5.875       | £5,842                            | £4,773                 | 1.7                    | 3.0                                  | £0                             | £0                                         | £ 1,752.56                          | £ 1,431.85                | £ 4,089.30      | £ 3,340.98                 |
| Year7Q1  | 6.125       | £5,842                            | £4,732                 | 1.7                    | 3.0                                  | £0                             | £0                                         | £ 1,752.56                          | £ 1,419.59                | £ 4,089.30      | £ 3,312.37                 |
| Year7Q2  | 6.375       | £5,842                            | £4,691                 | 1.7                    | 3.0                                  | £0                             | £0                                         | £ 1,752.56                          | £ 1,407.43                | £ 4,089.30      | £ 3,284.00                 |
| Year7Q3  | 6.625       | £5,842                            | £4,651                 | 1.3                    | 3.0                                  | £4,439                         | £3,534                                     | £ 1,752.56                          | £ 1,395.38                | £ 4,089.30      | £ 3,255.88                 |
| Year7Q4  | 6.875       | £5,842                            | £4,611                 | 1.3                    | 3.0                                  | £0                             | £0                                         | £ 1,752.56                          | £ 1,383.43                | £ 4,089.30      | £ 3,228.00                 |

|          |        |        |        |     |     |        |        |   |          |   |          |   |          |   |          |
|----------|--------|--------|--------|-----|-----|--------|--------|---|----------|---|----------|---|----------|---|----------|
| Year8Q1  | 7.125  | £5,842 | £4,572 | 1.3 | 3.0 | £0     | £0     | £ | 1,752.56 | £ | 1,371.58 | £ | 4,089.30 | £ | 3,200.36 |
| Year8Q2  | 7.375  | £5,842 | £4,533 | 1.3 | 3.0 | £0     | £0     | £ | 1,752.56 | £ | 1,359.84 | £ | 4,089.30 | £ | 3,172.95 |
| Year8Q3  | 7.625  | £5,842 | £4,494 | 1.1 | 3.0 | £4,439 | £3,415 | £ | 1,752.56 | £ | 1,348.19 | £ | 4,089.30 | £ | 3,145.78 |
| Year8Q4  | 7.875  | £5,842 | £4,455 | 1.1 | 3.0 | £0     | £0     | £ | 1,752.56 | £ | 1,336.65 | £ | 4,089.30 | £ | 3,118.84 |
| Year9Q1  | 8.125  | £5,842 | £4,417 | 1.1 | 3.0 | £0     | £0     | £ | 1,752.56 | £ | 1,325.20 | £ | 4,089.30 | £ | 3,092.13 |
| Year9Q2  | 8.375  | £5,842 | £4,380 | 1.1 | 3.0 | £0     | £0     | £ | 1,752.56 | £ | 1,313.85 | £ | 4,089.30 | £ | 3,065.65 |
| Year9Q3  | 8.625  | £5,842 | £4,342 | 0.9 | 3.0 | £4,439 | £3,299 | £ | 1,752.56 | £ | 1,302.60 | £ | 4,089.30 | £ | 3,039.40 |
| Year9Q4  | 8.875  | £5,842 | £4,305 | 0.9 | 3.0 | £0     | £0     | £ | 1,752.56 | £ | 1,291.45 | £ | 4,089.30 | £ | 3,013.37 |
| Year10Q1 | 9.125  | £5,842 | £4,268 | 0.9 | 3.0 | £0     | £0     | £ | 1,752.56 | £ | 1,280.39 | £ | 4,089.30 | £ | 2,987.57 |
| Year10Q2 | 9.375  | £5,842 | £4,231 | 0.9 | 3.0 | £0     | £0     | £ | 1,752.56 | £ | 1,269.42 | £ | 4,089.30 | £ | 2,961.98 |
| Year10Q3 | 9.625  | £5,842 | £4,195 | 0.7 | 3.0 | £4,439 | £3,188 | £ | 1,752.56 | £ | 1,258.55 | £ | 4,089.30 | £ | 2,936.62 |
| Year10Q4 | 9.875  | £5,842 | £4,159 | 0.7 | 3.0 | £0     | £0     | £ | 1,752.56 | £ | 1,247.77 | £ | 4,089.30 | £ | 2,911.47 |
| Year11Q1 | 10.125 | £5,842 | £4,124 | 0.7 | 3.0 | £0     | £0     | £ | 1,752.56 | £ | 1,237.09 | £ | 4,089.30 | £ | 2,886.54 |
| Year11Q2 | 10.375 | £5,842 | £4,088 | 0.7 | 3.0 | £0     | £0     | £ | 1,752.56 | £ | 1,226.49 | £ | 4,089.30 | £ | 2,861.82 |
| Year11Q3 | 10.625 | £5,842 | £4,053 | 0.5 | 3.0 | £4,439 | £3,080 | £ | 1,752.56 | £ | 1,215.99 | £ | 4,089.30 | £ | 2,837.31 |
| Year11Q4 | 10.875 | £5,842 | £4,019 | 0.5 | 3.0 | £0     | £0     | £ | 1,752.56 | £ | 1,205.58 | £ | 4,089.30 | £ | 2,813.02 |
| Year12Q1 | 11.125 | £5,842 | £3,984 | 0.5 | 3.0 | £0     | £0     | £ | 1,752.56 | £ | 1,195.25 | £ | 4,089.30 | £ | 2,788.93 |
| Year12Q2 | 11.375 | £5,842 | £3,950 | 0.5 | 3.0 | £0     | £0     | £ | 1,752.56 | £ | 1,185.02 | £ | 4,089.30 | £ | 2,765.04 |
| Year12Q3 | 11.625 | £5,842 | £3,916 | 0.4 | 3.0 | £4,439 | £2,976 | £ | 1,752.56 | £ | 1,174.87 | £ | 4,089.30 | £ | 2,741.37 |
| Year12Q4 | 11.875 | £5,842 | £3,883 | 0.4 | 3.0 | £0     | £0     | £ | 1,752.56 | £ | 1,164.81 | £ | 4,089.30 | £ | 2,717.89 |
| Year13Q1 | 12.125 | £5,842 | £3,849 | 0.4 | 3.0 | £0     | £0     | £ | 1,752.56 | £ | 1,154.83 | £ | 4,089.30 | £ | 2,694.61 |
| Year13Q2 | 12.375 | £5,842 | £3,816 | 0.4 | 3.0 | £0     | £0     | £ | 1,752.56 | £ | 1,144.95 | £ | 4,089.30 | £ | 2,671.54 |
| Year13Q3 | 12.625 | £5,842 | £3,784 | 0.4 | 3.0 | £4,439 | £2,875 | £ | 1,752.56 | £ | 1,135.14 | £ | 4,089.30 | £ | 2,648.66 |
| Year13Q4 | 12.875 | £5,842 | £3,751 | 0.4 | 3.0 | £0     | £0     | £ | 1,752.56 | £ | 1,125.42 | £ | 4,089.30 | £ | 2,625.98 |
| Year14Q1 | 13.125 | £5,842 | £3,719 | 0.4 | 3.0 | £0     | £0     | £ | 1,752.56 | £ | 1,115.78 | £ | 4,089.30 | £ | 2,603.49 |
| Year14Q2 | 13.375 | £5,842 | £3,687 | 0.4 | 3.0 | £0     | £0     | £ | 1,752.56 | £ | 1,106.23 | £ | 4,089.30 | £ | 2,581.20 |
| Year14Q3 | 13.625 | £5,842 | £3,656 | 0.3 | 3.0 | £4,439 | £2,778 | £ | 1,752.56 | £ | 1,096.75 | £ | 4,089.30 | £ | 2,559.09 |
| Year14Q4 | 13.875 | £5,842 | £3,625 | 0.3 | 3.0 | £0     | £0     | £ | 1,752.56 | £ | 1,087.36 | £ | 4,089.30 | £ | 2,537.18 |
| Year15Q1 | 14.125 | £5,842 | £3,594 | 0.3 | 3.0 | £0     | £0     | £ | 1,752.56 | £ | 1,078.05 | £ | 4,089.30 | £ | 2,515.45 |
| Year15Q2 | 14.375 | £5,842 | £3,563 | 0.3 | 3.0 | £0     | £0     | £ | 1,752.56 | £ | 1,068.82 | £ | 4,089.30 | £ | 2,493.91 |
| Year15Q3 | 14.625 | £5,842 | £3,532 | 0.2 | 3.0 | £4,439 | £2,684 | £ | 1,752.56 | £ | 1,059.67 | £ | 4,089.30 | £ | 2,472.55 |
| Year15Q4 | 14.875 | £5,842 | £3,502 | 0.2 | 3.0 | £0     | £0     | £ | 1,752.56 | £ | 1,050.59 | £ | 4,089.30 | £ | 2,451.38 |
| Year16Q1 | 15.125 | £5,842 | £3,472 | 0.2 | 3.0 | £0     | £0     | £ | 1,752.56 | £ | 1,041.59 | £ | 4,089.30 | £ | 2,430.39 |
| Year16Q2 | 15.375 | £5,842 | £3,442 | 0.2 | 3.0 | £0     | £0     | £ | 1,752.56 | £ | 1,032.68 | £ | 4,089.30 | £ | 2,409.58 |
| Year16Q3 | 15.625 | £5,842 | £3,413 | 0.2 | 3.0 | £4,439 | £2,593 | £ | 1,752.56 | £ | 1,023.83 | £ | 4,089.30 | £ | 2,388.94 |
| Year16Q4 | 15.875 | £5,842 | £3,384 | 0.2 | 3.0 | £0     | £0     | £ | 1,752.56 | £ | 1,015.06 | £ | 4,089.30 | £ | 2,368.48 |
| Year17Q1 | 16.125 | £5,842 | £3,355 | 0.2 | 3.0 | £0     | £0     | £ | 1,752.56 | £ | 1,006.37 | £ | 4,089.30 | £ | 2,348.20 |
| Year17Q2 | 16.375 | £5,842 | £3,326 | 0.2 | 3.0 | £0     | £0     | £ | 1,752.56 | £ | 997.75   | £ | 4,089.30 | £ | 2,328.09 |
| Year17Q3 | 16.625 | £5,842 | £3,297 | 0.1 | 3.0 | £4,439 | £2,506 | £ | 1,752.56 | £ | 989.21   | £ | 4,089.30 | £ | 2,308.16 |
| Year17Q4 | 16.875 | £5,842 | £3,269 | 0.1 | 3.0 | £0     | £0     | £ | 1,752.56 | £ | 980.74   | £ | 4,089.30 | £ | 2,288.39 |
| Year18Q1 | 17.125 | £5,842 | £3,241 | 0.1 | 3.0 | £0     | £0     | £ | 1,752.56 | £ | 972.34   | £ | 4,089.30 | £ | 2,268.79 |
| Year18Q2 | 17.375 | £5,842 | £3,213 | 0.1 | 3.0 | £0     | £0     | £ | 1,752.56 | £ | 964.01   | £ | 4,089.30 | £ | 2,249.36 |
| Year18Q3 | 17.625 | £5,842 | £3,186 | 0.1 | 3.0 | £4,439 | £2,421 | £ | 1,752.56 | £ | 955.76   | £ | 4,089.30 | £ | 2,230.10 |
| Year18Q4 | 17.875 | £5,842 | £3,159 | 0.1 | 3.0 | £0     | £0     | £ | 1,752.56 | £ | 947.57   | £ | 4,089.30 | £ | 2,211.00 |

|          |        |        |        |     |     |        |        |   |          |   |        |   |          |   |          |
|----------|--------|--------|--------|-----|-----|--------|--------|---|----------|---|--------|---|----------|---|----------|
| Year19Q1 | 18.125 | £5,842 | £3,132 | 0.1 | 3.0 | £0     | £0     | £ | 1,752.56 | £ | 939.46 | £ | 4,089.30 | £ | 2,192.07 |
| Year19Q2 | 18.375 | £5,842 | £3,105 | 0.1 | 3.0 | £0     | £0     | £ | 1,752.56 | £ | 931.41 | £ | 4,089.30 | £ | 2,173.30 |
| Year19Q3 | 18.625 | £5,842 | £3,078 | 0.1 | 3.0 | £4,439 | £2,339 | £ | 1,752.56 | £ | 923.44 | £ | 4,089.30 | £ | 2,154.69 |
| Year19Q4 | 18.875 | £5,842 | £3,052 | 0.1 | 3.0 | £0     | £0     | £ | 1,752.56 | £ | 915.53 | £ | 4,089.30 | £ | 2,136.24 |
| Year20Q1 | 19.125 | £5,842 | £3,026 | 0.1 | 3.0 | £0     | £0     | £ | 1,752.56 | £ | 907.69 | £ | 4,089.30 | £ | 2,117.94 |
| Year20Q2 | 19.375 | £5,842 | £3,000 | 0.1 | 3.0 | £0     | £0     | £ | 1,752.56 | £ | 899.92 | £ | 4,089.30 | £ | 2,099.81 |
| Year20Q3 | 19.625 | £5,842 | £2,974 | 0.1 | 3.0 | £4,439 | £2,260 | £ | 1,752.56 | £ | 892.21 | £ | 4,089.30 | £ | 2,081.82 |
| Year20Q4 | 19.875 | £5,842 | £2,949 | 0.1 | 3.0 | £0     | £0     | £ | 1,752.56 | £ | 884.57 | £ | 4,089.30 | £ | 2,064.00 |
| Year21Q1 | 20.125 | £5,842 | £2,923 | 0.1 | 3.0 | £0     | £0     | £ | 1,752.56 | £ | 876.99 | £ | 4,089.30 | £ | 2,046.32 |
| Year21Q2 | 20.375 | £5,842 | £2,898 | 0.1 | 3.0 | £0     | £0     | £ | 1,752.56 | £ | 869.48 | £ | 4,089.30 | £ | 2,028.80 |
| Year21Q3 | 20.625 | £5,842 | £2,873 | 0.1 | 3.0 | £4,439 | £2,183 | £ | 1,752.56 | £ | 862.04 | £ | 4,089.30 | £ | 2,011.42 |
| Year21Q4 | 20.875 | £5,842 | £2,849 | 0.1 | 3.0 | £0     | £0     | £ | 1,752.56 | £ | 854.66 | £ | 4,089.30 | £ | 1,994.20 |
| Year22Q1 | 21.125 | £5,842 | £2,824 | 0.1 | 3.0 | £0     | £0     | £ | 1,752.56 | £ | 847.34 | £ | 4,089.30 | £ | 1,977.12 |
| Year22Q2 | 21.375 | £5,842 | £2,800 | 0.1 | 3.0 | £0     | £0     | £ | 1,752.56 | £ | 840.08 | £ | 4,089.30 | £ | 1,960.19 |
| Year22Q3 | 21.625 | £5,842 | £2,776 | 0.0 | 3.0 | £4,439 | £2,110 | £ | 1,752.56 | £ | 832.89 | £ | 4,089.30 | £ | 1,943.41 |
| Year22Q4 | 21.875 | £5,842 | £2,753 | 0.0 | 3.0 | £0     | £0     | £ | 1,752.56 | £ | 825.76 | £ | 4,089.30 | £ | 1,926.76 |
| Year23Q1 | 22.125 | £5,842 | £2,729 | 0.0 | 3.0 | £0     | £0     | £ | 1,752.56 | £ | 818.68 | £ | 4,089.30 | £ | 1,910.26 |
| Year23Q2 | 22.375 | £5,842 | £2,706 | 0.0 | 3.0 | £0     | £0     | £ | 1,752.56 | £ | 811.67 | £ | 4,089.30 | £ | 1,893.90 |
| Year23Q3 | 22.625 | £5,842 | £2,682 | 0.0 | 3.0 | £4,439 | £2,038 | £ | 1,752.56 | £ | 804.72 | £ | 4,089.30 | £ | 1,877.69 |
| Year23Q4 | 22.875 | £5,842 | £2,659 | 0.0 | 3.0 | £0     | £0     | £ | 1,752.56 | £ | 797.83 | £ | 4,089.30 | £ | 1,861.61 |
| Year24Q1 | 23.125 | £5,842 | £2,637 | 0.0 | 3.0 | £0     | £0     | £ | 1,752.56 | £ | 791.00 | £ | 4,089.30 | £ | 1,845.66 |
| Year24Q2 | 23.375 | £5,842 | £2,614 | 0.0 | 3.0 | £0     | £0     | £ | 1,752.56 | £ | 784.23 | £ | 4,089.30 | £ | 1,829.86 |
| Year24Q3 | 23.625 | £5,842 | £2,592 | 0.0 | 3.0 | £4,439 | £1,969 | £ | 1,752.56 | £ | 777.51 | £ | 4,089.30 | £ | 1,814.19 |
| Year24Q4 | 23.875 | £5,842 | £2,570 | 0.0 | 3.0 | £0     | £0     | £ | 1,752.56 | £ | 770.85 | £ | 4,089.30 | £ | 1,798.65 |
| Year25Q1 | 24.125 | £5,842 | £2,548 | 0.0 | 3.0 | £0     | £0     | £ | 1,752.56 | £ | 764.25 | £ | 4,089.30 | £ | 1,783.25 |
| Year25Q2 | 24.375 | £5,842 | £2,526 | 0.0 | 3.0 | £0     | £0     | £ | 1,752.56 | £ | 757.71 | £ | 4,089.30 | £ | 1,767.98 |
| Year25Q3 | 24.625 | £5,842 | £2,504 | 0.0 | 3.0 | £4,439 | £1,903 | £ | 1,752.56 | £ | 751.22 | £ | 4,089.30 | £ | 1,752.84 |
| Year25Q4 | 24.875 | £5,842 | £2,483 | 0.0 | 3.0 | £0     | £0     | £ | 1,752.56 | £ | 744.78 | £ | 4,089.30 | £ | 1,737.83 |
| Year26Q5 | 25.125 | £5,842 | £2,461 | 0.0 | 3.0 | £0     | £0     | £ | 1,752.56 | £ | 738.41 | £ | 4,089.30 | £ | 1,722.95 |
| Year26Q6 | 25.375 | £5,842 | £2,440 | 0.0 | 3.0 | £0     | £0     | £ | 1,752.56 | £ | 732.08 | £ | 4,089.30 | £ | 1,708.19 |
| Year26Q7 | 25.625 | £5,842 | £2,419 | 0.0 | 3.0 | £4,439 | £1,838 | £ | 1,752.56 | £ | 725.81 | £ | 4,089.30 | £ | 1,693.57 |
| Year26Q8 | 25.875 | £5,842 | £2,399 | 0.0 | 3.0 | £0     | £0     | £ | 1,752.56 | £ | 719.60 | £ | 4,089.30 | £ | 1,679.06 |

| Year Quarter | Cumulative cost surveillance | Cumulative cost surveillance discounted | Cumulative prevented cost | Cumulative prevented cost discounted | Net saving | Ratio | Year  | Year of cost saving |
|--------------|------------------------------|-----------------------------------------|---------------------------|--------------------------------------|------------|-------|-------|---------------------|
| Year1Q1      | £ 8,878                      | £ 8,859                                 | £ 1,168                   | £ 1,163                              | £ 7,696    | 7.61  | 1.125 | 999                 |
| Year1Q2      | £ 8,878                      | £ 8,859                                 | £ 2,337                   | £ 2,317                              | £ 6,542    | 3.82  | 1.375 | 999                 |
| Year1Q3      | £ 13,317                     | £ 13,203                                | £ 4,440                   | £ 4,375                              | £ 8,828    | 3.02  | 1.625 | 999                 |
| Year1Q4      | £ 13,317                     | £ 13,203                                | £ 6,543                   | £ 6,416                              | £ 6,788    | 2.06  | 1.875 | 999                 |
| Year2Q1      | £ 17,756                     | £ 17,474                                | £ 9,394                   | £ 9,158                              | £ 8,316    | 1.91  | 2.125 | 999                 |
| Year2Q2      | £ 17,756                     | £ 17,474                                | £ 12,245                  | £ 11,877                             | £ 5,596    | 1.47  | 2.375 | 999                 |
| Year2Q3      | £ 22,195                     | £ 21,672                                | £ 15,694                  | £ 15,139                             | £ 6,533    | 1.43  | 2.625 | 999                 |
| Year2Q4      | £ 22,195                     | £ 21,672                                | £ 19,143                  | £ 18,373                             | £ 3,299    | 1.18  | 2.875 | 999                 |

|          |   |        |   |        |   |         |   |         |    |        |      |        |        |
|----------|---|--------|---|--------|---|---------|---|---------|----|--------|------|--------|--------|
| Year3Q1  | £ | 22,195 | £ | 21,672 | £ | 22,592  | £ | 21,578  | £  | 93     | 1.00 | 3.125  | 999    |
| Year3Q2  | £ | 22,195 | £ | 21,672 | £ | 26,041  | £ | 24,757  | -£ | 3,085  | 0.88 | 3.375  | 3.375  |
| Year3Q3  | £ | 26,634 | £ | 25,727 | £ | 29,968  | £ | 28,345  | -£ | 2,618  | 0.91 | 3.625  | 3.625  |
| Year3Q4  | £ | 26,634 | £ | 25,727 | £ | 33,896  | £ | 31,903  | -£ | 6,176  | 0.81 | 3.875  | 3.875  |
| Year4Q1  | £ | 26,634 | £ | 25,727 | £ | 37,823  | £ | 35,430  | -£ | 9,703  | 0.73 | 4.125  | 4.125  |
| Year4Q2  | £ | 26,634 | £ | 25,727 | £ | 41,751  | £ | 38,927  | -£ | 13,200 | 0.66 | 4.375  | 4.375  |
| Year4Q3  | £ | 31,073 | £ | 29,646 | £ | 45,840  | £ | 42,537  | -£ | 12,892 | 0.70 | 4.625  | 4.625  |
| Year4Q4  | £ | 31,073 | £ | 29,646 | £ | 49,930  | £ | 46,116  | -£ | 16,470 | 0.64 | 4.875  | 4.875  |
| Year5Q1  | £ | 31,073 | £ | 29,646 | £ | 54,019  | £ | 49,665  | -£ | 20,019 | 0.60 | 5.125  | 5.125  |
| Year5Q2  | £ | 31,073 | £ | 29,646 | £ | 58,108  | £ | 53,182  | -£ | 23,537 | 0.56 | 5.375  | 5.375  |
| Year5Q3  | £ | 35,512 | £ | 33,432 | £ | 62,197  | £ | 56,670  | -£ | 23,238 | 0.59 | 5.625  | 5.625  |
| Year5Q4  | £ | 35,512 | £ | 33,432 | £ | 66,287  | £ | 60,128  | -£ | 26,696 | 0.56 | 5.875  | 5.875  |
| Year6Q1  | £ | 35,512 | £ | 33,432 | £ | 70,376  | £ | 63,556  | -£ | 30,125 | 0.53 | 6.125  | 6.125  |
| Year6Q2  | £ | 35,512 | £ | 33,432 | £ | 74,465  | £ | 66,955  | -£ | 33,524 | 0.50 | 6.375  | 6.375  |
| Year6Q3  | £ | 39,951 | £ | 37,090 | £ | 78,555  | £ | 70,325  | -£ | 33,235 | 0.53 | 6.625  | 6.625  |
| Year6Q4  | £ | 39,951 | £ | 37,090 | £ | 82,644  | £ | 73,666  | -£ | 36,576 | 0.50 | 6.875  | 6.875  |
| Year7Q1  | £ | 39,951 | £ | 37,090 | £ | 86,733  | £ | 76,979  | -£ | 39,889 | 0.48 | 7.125  | 7.125  |
| Year7Q2  | £ | 39,951 | £ | 37,090 | £ | 90,823  | £ | 80,263  | -£ | 43,173 | 0.46 | 7.375  | 7.375  |
| Year7Q3  | £ | 44,390 | £ | 40,624 | £ | 94,912  | £ | 83,518  | -£ | 42,894 | 0.49 | 7.625  | 7.625  |
| Year7Q4  | £ | 44,390 | £ | 40,624 | £ | 99,001  | £ | 86,746  | -£ | 46,122 | 0.47 | 7.875  | 7.875  |
| Year8Q1  | £ | 44,390 | £ | 40,624 | £ | 103,090 | £ | 89,947  | -£ | 49,323 | 0.45 | 8.125  | 8.125  |
| Year8Q2  | £ | 44,390 | £ | 40,624 | £ | 107,180 | £ | 93,120  | -£ | 52,496 | 0.44 | 8.375  | 8.375  |
| Year8Q3  | £ | 48,829 | £ | 44,039 | £ | 111,269 | £ | 96,266  | -£ | 52,227 | 0.46 | 8.625  | 8.625  |
| Year8Q4  | £ | 48,829 | £ | 44,039 | £ | 115,358 | £ | 99,384  | -£ | 55,346 | 0.44 | 8.875  | 8.875  |
| Year9Q1  | £ | 48,829 | £ | 44,039 | £ | 119,448 | £ | 102,476 | -£ | 58,438 | 0.43 | 9.125  | 9.125  |
| Year9Q2  | £ | 48,829 | £ | 44,039 | £ | 123,537 | £ | 105,542 | -£ | 61,503 | 0.42 | 9.375  | 9.375  |
| Year9Q3  | £ | 53,268 | £ | 47,338 | £ | 127,626 | £ | 108,582 | -£ | 61,243 | 0.44 | 9.625  | 9.625  |
| Year9Q4  | £ | 53,268 | £ | 47,338 | £ | 131,715 | £ | 111,595 | -£ | 64,257 | 0.42 | 9.875  | 9.875  |
| Year10Q1 | £ | 53,268 | £ | 47,338 | £ | 135,805 | £ | 114,582 | -£ | 67,244 | 0.41 | 10.125 | 10.125 |
| Year10Q2 | £ | 53,268 | £ | 47,338 | £ | 139,894 | £ | 117,544 | -£ | 70,206 | 0.40 | 10.375 | 10.375 |
| Year10Q3 | £ | 57,707 | £ | 50,526 | £ | 143,983 | £ | 120,481 | -£ | 69,955 | 0.42 | 10.625 | 10.625 |
| Year10Q4 | £ | 57,707 | £ | 50,526 | £ | 148,073 | £ | 123,393 | -£ | 72,867 | 0.41 | 10.875 | 10.875 |
| Year11Q1 | £ | 57,707 | £ | 50,526 | £ | 152,162 | £ | 126,279 | -£ | 75,753 | 0.40 | 11.125 | 11.125 |
| Year11Q2 | £ | 57,707 | £ | 50,526 | £ | 156,251 | £ | 129,141 | -£ | 78,615 | 0.39 | 11.375 | 11.375 |
| Year11Q3 | £ | 62,146 | £ | 53,606 | £ | 160,341 | £ | 131,978 | -£ | 78,372 | 0.41 | 11.625 | 11.625 |
| Year11Q4 | £ | 62,146 | £ | 53,606 | £ | 164,430 | £ | 134,791 | -£ | 81,185 | 0.40 | 11.875 | 11.875 |
| Year12Q1 | £ | 62,146 | £ | 53,606 | £ | 168,519 | £ | 137,580 | -£ | 83,974 | 0.39 | 12.125 | 12.125 |
| Year12Q2 | £ | 62,146 | £ | 53,606 | £ | 172,608 | £ | 140,345 | -£ | 86,739 | 0.38 | 12.375 | 12.375 |
| Year12Q3 | £ | 66,585 | £ | 56,582 | £ | 176,698 | £ | 143,087 | -£ | 86,505 | 0.40 | 12.625 | 12.625 |
| Year12Q4 | £ | 66,585 | £ | 56,582 | £ | 180,787 | £ | 145,804 | -£ | 89,223 | 0.39 | 12.875 | 12.875 |
| Year13Q1 | £ | 66,585 | £ | 56,582 | £ | 184,876 | £ | 148,499 | -£ | 91,918 | 0.38 | 13.125 | 13.125 |
| Year13Q2 | £ | 66,585 | £ | 56,582 | £ | 188,966 | £ | 151,171 | -£ | 94,589 | 0.37 | 13.375 | 13.375 |
| Year13Q3 | £ | 71,024 | £ | 59,457 | £ | 193,055 | £ | 153,819 | -£ | 94,363 | 0.39 | 13.625 | 13.625 |
| Year13Q4 | £ | 71,024 | £ | 59,457 | £ | 197,144 | £ | 156,445 | -£ | 96,989 | 0.38 | 13.875 | 13.875 |

|          |   |         |   |        |   |         |   |         |    |         |      |        |        |
|----------|---|---------|---|--------|---|---------|---|---------|----|---------|------|--------|--------|
| Year14Q1 | £ | 71,024  | £ | 59,457 | £ | 201,234 | £ | 159,049 | -£ | 99,592  | 0.37 | 14.125 | 14.125 |
| Year14Q2 | £ | 71,024  | £ | 59,457 | £ | 205,323 | £ | 161,630 | -£ | 102,173 | 0.37 | 14.375 | 14.375 |
| Year14Q3 | £ | 75,462  | £ | 62,235 | £ | 209,412 | £ | 164,189 | -£ | 101,954 | 0.38 | 14.625 | 14.625 |
| Year14Q4 | £ | 75,462  | £ | 62,235 | £ | 213,501 | £ | 166,726 | -£ | 104,492 | 0.37 | 14.875 | 14.875 |
| Year15Q1 | £ | 75,462  | £ | 62,235 | £ | 217,591 | £ | 169,242 | -£ | 107,007 | 0.37 | 15.125 | 15.125 |
| Year15Q2 | £ | 75,462  | £ | 62,235 | £ | 221,680 | £ | 171,736 | -£ | 109,501 | 0.36 | 15.375 | 15.375 |
| Year15Q3 | £ | 79,901  | £ | 64,919 | £ | 225,769 | £ | 174,208 | -£ | 109,290 | 0.37 | 15.625 | 15.625 |
| Year15Q4 | £ | 79,901  | £ | 64,919 | £ | 229,859 | £ | 176,660 | -£ | 111,741 | 0.37 | 15.875 | 15.875 |
| Year16Q1 | £ | 79,901  | £ | 64,919 | £ | 233,948 | £ | 179,090 | -£ | 114,171 | 0.36 | 16.125 | 16.125 |
| Year16Q2 | £ | 79,901  | £ | 64,919 | £ | 238,037 | £ | 181,499 | -£ | 116,581 | 0.36 | 16.375 | 16.375 |
| Year16Q3 | £ | 84,340  | £ | 67,512 | £ | 242,126 | £ | 183,888 | -£ | 116,377 | 0.37 | 16.625 | 16.625 |
| Year16Q4 | £ | 84,340  | £ | 67,512 | £ | 246,216 | £ | 186,257 | -£ | 118,745 | 0.36 | 16.875 | 16.875 |
| Year17Q1 | £ | 84,340  | £ | 67,512 | £ | 250,305 | £ | 188,605 | -£ | 121,093 | 0.36 | 17.125 | 17.125 |
| Year17Q2 | £ | 84,340  | £ | 67,512 | £ | 254,394 | £ | 190,933 | -£ | 123,421 | 0.35 | 17.375 | 17.375 |
| Year17Q3 | £ | 88,779  | £ | 70,017 | £ | 258,484 | £ | 193,241 | -£ | 123,224 | 0.36 | 17.625 | 17.625 |
| Year17Q4 | £ | 88,779  | £ | 70,017 | £ | 262,573 | £ | 195,530 | -£ | 125,512 | 0.36 | 17.875 | 17.875 |
| Year18Q1 | £ | 88,779  | £ | 70,017 | £ | 266,662 | £ | 197,799 | -£ | 127,781 | 0.35 | 18.125 | 18.125 |
| Year18Q2 | £ | 88,779  | £ | 70,017 | £ | 270,752 | £ | 200,048 | -£ | 130,031 | 0.35 | 18.375 | 18.375 |
| Year18Q3 | £ | 93,218  | £ | 72,438 | £ | 274,841 | £ | 202,278 | -£ | 129,840 | 0.36 | 18.625 | 18.625 |
| Year18Q4 | £ | 93,218  | £ | 72,438 | £ | 278,930 | £ | 204,489 | -£ | 132,051 | 0.35 | 18.875 | 18.875 |
| Year19Q1 | £ | 93,218  | £ | 72,438 | £ | 283,019 | £ | 206,681 | -£ | 134,243 | 0.35 | 19.125 | 19.125 |
| Year19Q2 | £ | 93,218  | £ | 72,438 | £ | 287,109 | £ | 208,854 | -£ | 136,416 | 0.35 | 19.375 | 19.375 |
| Year19Q3 | £ | 97,657  | £ | 74,777 | £ | 291,198 | £ | 211,009 | -£ | 136,232 | 0.35 | 19.625 | 19.625 |
| Year19Q4 | £ | 97,657  | £ | 74,777 | £ | 295,287 | £ | 213,145 | -£ | 138,368 | 0.35 | 19.875 | 19.875 |
| Year20Q1 | £ | 97,657  | £ | 74,777 | £ | 299,377 | £ | 215,263 | -£ | 140,486 | 0.35 | 20.125 | 20.125 |
| Year20Q2 | £ | 97,657  | £ | 74,777 | £ | 303,466 | £ | 217,363 | -£ | 142,586 | 0.34 | 20.375 | 20.375 |
| Year20Q3 | £ | 102,096 | £ | 77,037 | £ | 307,555 | £ | 219,445 | -£ | 142,408 | 0.35 | 20.625 | 20.625 |
| Year20Q4 | £ | 102,096 | £ | 77,037 | £ | 311,644 | £ | 221,509 | -£ | 144,472 | 0.35 | 20.875 | 20.875 |
| Year21Q1 | £ | 102,096 | £ | 77,037 | £ | 315,734 | £ | 223,555 | -£ | 146,518 | 0.34 | 21.125 | 21.125 |
| Year21Q2 | £ | 102,096 | £ | 77,037 | £ | 319,823 | £ | 225,584 | -£ | 148,547 | 0.34 | 21.375 | 21.375 |
| Year21Q3 | £ | 106,535 | £ | 79,220 | £ | 323,912 | £ | 227,595 | -£ | 148,375 | 0.35 | 21.625 | 21.625 |
| Year21Q4 | £ | 106,535 | £ | 79,220 | £ | 328,002 | £ | 229,590 | -£ | 150,369 | 0.35 | 21.875 | 21.875 |
| Year22Q1 | £ | 106,535 | £ | 79,220 | £ | 332,091 | £ | 231,567 | -£ | 152,346 | 0.34 | 22.125 | 22.125 |
| Year22Q2 | £ | 106,535 | £ | 79,220 | £ | 336,180 | £ | 233,527 | -£ | 154,307 | 0.34 | 22.375 | 22.375 |
| Year22Q3 | £ | 110,974 | £ | 81,330 | £ | 340,270 | £ | 235,470 | -£ | 154,140 | 0.35 | 22.625 | 22.625 |
| Year22Q4 | £ | 110,974 | £ | 81,330 | £ | 344,359 | £ | 237,397 | -£ | 156,067 | 0.34 | 22.875 | 22.875 |
| Year23Q1 | £ | 110,974 | £ | 81,330 | £ | 348,448 | £ | 239,307 | -£ | 157,977 | 0.34 | 23.125 | 23.125 |
| Year23Q2 | £ | 110,974 | £ | 81,330 | £ | 352,537 | £ | 241,201 | -£ | 159,871 | 0.34 | 23.375 | 23.375 |
| Year23Q3 | £ | 115,413 | £ | 83,368 | £ | 356,627 | £ | 243,079 | -£ | 159,711 | 0.34 | 23.625 | 23.625 |
| Year23Q4 | £ | 115,413 | £ | 83,368 | £ | 360,716 | £ | 244,941 | -£ | 161,572 | 0.34 | 23.875 | 23.875 |
| Year24Q1 | £ | 115,413 | £ | 83,368 | £ | 364,805 | £ | 246,786 | -£ | 163,418 | 0.34 | 24.125 | 24.125 |
| Year24Q2 | £ | 115,413 | £ | 83,368 | £ | 368,895 | £ | 248,616 | -£ | 165,248 | 0.34 | 24.375 | 24.375 |
| Year24Q3 | £ | 119,852 | £ | 85,338 | £ | 372,984 | £ | 250,430 | -£ | 165,093 | 0.34 | 24.625 | 24.625 |
| Year24Q4 | £ | 119,852 | £ | 85,338 | £ | 377,073 | £ | 252,229 | -£ | 166,891 | 0.34 | 24.875 | 24.875 |

|          |   |         |   |        |   |         |   |         |    |         |      |        |        |
|----------|---|---------|---|--------|---|---------|---|---------|----|---------|------|--------|--------|
| Year25Q1 | £ | 119,852 | £ | 85,338 | £ | 381,162 | £ | 254,012 | -£ | 168,675 | 0.34 | 25.125 | 25.125 |
| Year25Q2 | £ | 119,852 | £ | 85,338 | £ | 385,252 | £ | 255,780 | -£ | 170,443 | 0.33 | 25.375 | 25.375 |
| Year25Q3 | £ | 124,291 | £ | 87,240 | £ | 389,341 | £ | 257,533 | -£ | 170,293 | 0.34 | 25.625 | 25.625 |
| Year25Q4 | £ | 124,291 | £ | 87,240 | £ | 393,430 | £ | 259,271 | -£ | 172,031 | 0.34 | 25.875 | 25.875 |
